# Supplementary material for: Ir-catalyzed intermolecular asymmetric allylic dearomatization reaction of indoles
Source: Royal Society of Chemistry journal article supplement (doi:10.1039/c3sc53019a), 2013-11-19

*Supporting Information for*  
**Ir-Catalyzed Intermolecular Asymmetric Allylic Dearomatization  
Reaction of Indoles**

Xiao Zhang, Long Han, and Shu-Li You\*

State Key Laboratory of Organometallic Chemistry,  
Shanghai Institute of Organic Chemistry, Chinese Academy of Sciences  
345 Lingling Lu, Shanghai 200032, China

E-mail: [slyou@sioc.ac.cn](mailto:slyou@sioc.ac.cn)

**Table of Contents**

|                                                |        |
|------------------------------------------------|--------|
| General methods                                | S2-3   |
| Experimental details and characterization data | S3-14  |
| Copies of NMR spectra and HPLC chromatographs  | S14-65 |

**General methods.** Unless stated otherwise, all reactions were carried out in flame-dried glassware under a dry argon atmosphere. All solvents were freshly distilled according to standard methods prior to use.

$^1\text{H}$  and  $^{13}\text{C}$  NMR spectra were recorded on a Varian instrument (300 MHz and 75 MHz, 400 MHz and 100 MHz, respectively) and internally referenced to tetramethylsilane signal or residual protio solvent signals.  $^{19}\text{F}$  NMR spectra were recorded on Varian instrument (282 MHz and 376 MHz, respectively) and referenced relative to  $\text{CFCl}_3$ . Data for  $^1\text{H}$  NMR are recorded as follows: chemical shift ( $\delta$ , ppm), multiplicity (s = singlet, d = doublet, t = triplet, m = multiplet or unresolved, br = broad singlet, coupling constant(s) in Hz, integration). Data for  $^{13}\text{C}$  NMR are reported in terms of chemical shift ( $\delta$ , ppm).

**General procedure for iridium-catalyzed intermolecular asymmetric allylic dearomatization reaction of indoles:**

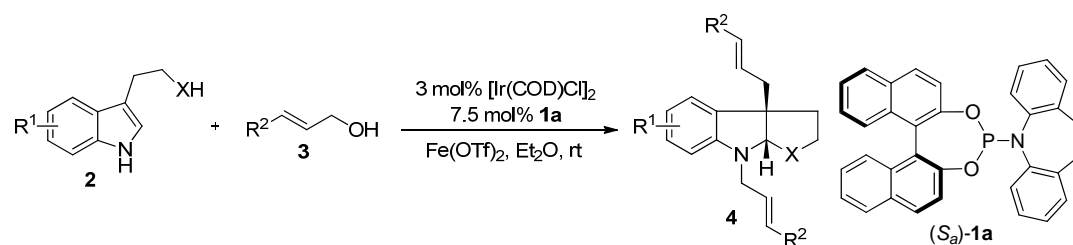

A flame-dried Schlenk tube was cooled to room temperature and filled with argon. To this flask were added  $[\text{Ir}(\text{COD})\text{Cl}]_2$  (4.0 mg, 0.006 mmol, 3 mol%), **(*S<sub>a</sub>)-1a*** (7.6 mg, 0.015 mmol, 7.5 mol%), indole derivative **2** (0.20 mmol, 100 mol%), allylic alcohol (0.60 mmol, 300 mol%),  $\text{Fe}(\text{OTf})_2$  (70.8 mg, 0.20 mmol, 100 mol%), ether (2 mL). The reaction mixture was stirred at room temperature. After the reaction was complete (monitored by TLC), the mixture was quenched with water, and extracted with ether. The combined organic layers were washed with brine, dried over  $\text{Na}_2\text{SO}_4$ , and filtered. The solvent was removed under reduced pressure, and the residue was

purified by silica gel column chromatography (PE/EA = 10/1) to afford the desired product **4**. The characterization data of the products are summarized below.

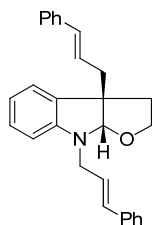

**4aa**<sup>[1]</sup>. Yellow oil, 97% yield, 94% ee [Daicel Chiralpak AD-H (0.46 cm x 25 cm), *n*-hexane/2-propanol = 100/1,  $\nu = 1.0 \text{ mL} \cdot \text{min}^{-1}$ ,  $\lambda = 254 \text{ nm}$ ,  $t$  (major) = 11.42 min,  $t$  (minor) = 14.76 min];  $[\alpha]_{\text{D}}^{19} = +107.5$  ( $c = 1.0$ ,  $\text{CHCl}_3$ ).  $^1\text{H}$  NMR (300 MHz,  $\text{CDCl}_3$ )  $\delta$  2.12-2.25 (m, 2H), 2.62 (dd,  $J = 8.4, 13.8 \text{ Hz}$ , 1H), 2.79 (dd,  $J = 6.0, 13.8 \text{ Hz}$ , 1H), 3.48-3.57 (m, 1H), 3.96-4.01 (m, 1H), 4.07 (d,  $J = 5.4 \text{ Hz}$ , 2H), 5.36 (s, 1H), 6.03-6.21 (m, 2H), 6.42-6.57 (m, 3H), 6.69 (t,  $J = 7.5 \text{ Hz}$ , 1H), 7.09 (t,  $J = 6.9 \text{ Hz}$ , 2H), 7.21-7.27 (m, 10H).

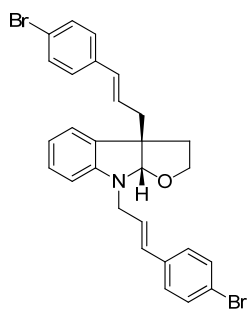

**4ab**. Yellow oil, 92% yield, 95% ee [Daicel Chiralpak AD-H (0.46 cm x 25 cm), *n*-hexane/2-propanol = 100/1,  $\nu = 1.0 \text{ mL} \cdot \text{min}^{-1}$ ,  $\lambda = 254 \text{ nm}$ ,  $t$  (major) = 18.93 min,  $t$  (minor) = 39.01 min];  $[\alpha]_{\text{D}}^{20} = +97.4$  ( $c = 1.0$ ,  $\text{CHCl}_3$ ).  $^1\text{H}$  NMR (300 MHz,  $\text{CDCl}_3$ )  $\delta$  2.15-2.19 (m, 2H), 2.58 (dd,  $J = 9.0, 13.8 \text{ Hz}$ , 1H), 2.80 (dd,  $J = 5.1, 13.8 \text{ Hz}$ , 1H), 3.48-3.56 (m, 1H), 3.95-4.05 (m, 3H), 5.33 (s, 1H), 5.96-6.15 (m, 2H), 6.33-6.45 (m, 3H), 6.70 (t,  $J = 7.5 \text{ Hz}$ , 1H), 6.98 (d,  $J = 8.4 \text{ Hz}$ , 2H), 7.06-7.12 (m, 4H), 7.32-7.36 (m, 4H).  $^{13}\text{C}$  NMR (100 MHz,  $\text{CDCl}_3$ )  $\delta$  40.3, 41.8, 46.3, 56.4, 66.9, 100.9, 105.3, 117.5, 120.9, 121.0, 123.2, 126.5, 126.9, 127.6, 127.7, 128.3, 130.3, 131.5, 131.6,

131.7, 132.0, 135.6, 136.0, 150.1. IR (thin film):  $\nu_{\max}$  ( $\text{cm}^{-1}$ ) = 2963, 1261, 1091, 1019, 865, 799, 689, 664; HRMS (ESI) calcd for  $\text{C}_{28}\text{H}_{26}\text{Br}_2\text{NO}$   $[\text{M}+\text{H}]^+$ : 550.0376. Found: 550.0356.

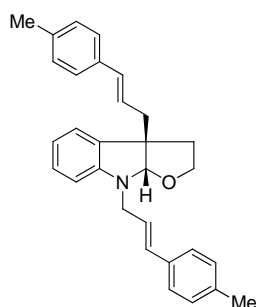

**4ac.** Yellow oil, 77% yield, 94% ee [Daicel Chiralpak AD-H (0.46 cm x 25 cm), *n*-hexane/2-propanol = 100/1,  $\nu$  = 1.0 mL · min<sup>-1</sup>,  $\lambda$  = 254 nm, *t* (major) = 10.20 min, *t* (minor) = 16.05 min];  $[\alpha]_{\text{D}}^{21}$  = +109.9 (*c* = 1.0,  $\text{CHCl}_3$ ). <sup>1</sup>H NMR (300 MHz,  $\text{CDCl}_3$ )  $\delta$  2.09-2.20 (m, 2H), 2.30 (s, 3H), 2.32 (s, 3H), 2.59 (dd, *J* = 9.0, 13.8 Hz, 1H), 2.75 (dd, *J* = 6.0, 13.8 Hz, 1H), 3.47-3.56 (m, 1H), 3.97 (t, *J* = 7.2 Hz, 1H), 4.05 (d, *J* = 5.7 Hz, 2H), 5.35 (s, 1H), 5.97-6.15 (m, 2H), 6.37-6.53 (m, 3H), 6.67 (t, *J* = 7.5 Hz, 1H), 7.01-7.17 (m, 10H). <sup>13</sup>C NMR (100 MHz,  $\text{CDCl}_3$ )  $\delta$  21.1, 40.0, 41.8, 46.6, 56.4, 66.9, 101.2, 105.4, 117.3, 123.3, 124.7, 124.9, 126.0, 126.2, 128.2, 129.1, 129.2, 131.5, 132.5, 132.8, 134.0, 134.5, 136.8, 137.0, 150.2. IR (thin film):  $\nu_{\max}$  ( $\text{cm}^{-1}$ ) = 2963, 1260, 1088, 1018, 865, 797, 702, 664; HRMS (ESI) calcd for  $\text{C}_{30}\text{H}_{32}\text{NO}$   $[\text{M}+\text{H}]^+$ : 422.2484. Found: 422.2470.

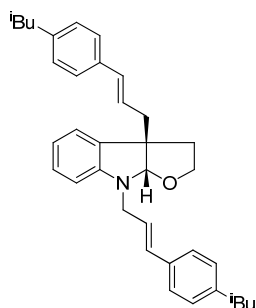

**4ad.** Yellow oil, 93% yield, 91% ee [Daicel Chiralpak AD-H (0.46 cm x 25 cm), *n*-hexane/2-propanol = 100/1,  $\nu$  = 1.0 mL · min<sup>-1</sup>,  $\lambda$  = 220 nm, *t* (major) = 7.11 min, *t* (minor) = 9.20 min];  $[\alpha]_{\text{D}}^{23}$  = +68.1 (*c* = 1.0,  $\text{CHCl}_3$ ). <sup>1</sup>H NMR (400 MHz,  $\text{CDCl}_3$ )  $\delta$

0.88-0.90 (m, 12H), 1.78-1.89 (m, 2H), 2.11-2.23 (m, 2H), 2.42-2.45 (m, 4H), 2.61 (dd,  $J = 8.4, 14.0$  Hz, 1H), 2.73-2.78 (m, 1H), 3.49-3.55 (m, 1H), 3.95-3.99 (m, 1H), 4.06 (d,  $J = 7.2$  Hz, 2H), 5.36 (s, 1H), 6.02-6.18 (m, 2H), 6.40-6.45 (m, 2H), 6.53 (d,  $J = 16.0$  Hz, 1H), 6.66-6.70 (m, 1H), 7.00-7.10 (m, 6H), 7.15-7.20 (m, 4H).  $^{13}\text{C}$  NMR (100 MHz,  $\text{CDCl}_3$ )  $\delta$  22.34, 22.36, 30.2, 40.0, 41.8, 45.1, 46.6, 56.4, 66.9, 101.2, 105.4, 117.3, 123.3, 124.8, 124.9, 125.9, 126.1, 128.2, 129.2, 129.3, 131.6, 132.6, 132.9, 134.3, 134.8, 140.8, 140.9, 150.2. IR (thin film):  $\nu_{\text{max}}$  ( $\text{cm}^{-1}$ ) = 3048, 2961, 2921, 2867, 1606, 1510, 1490, 1463, 1260, 1158, 1017, 966, 943, 798, 740, 687; HRMS (ESI) calcd for  $\text{C}_{36}\text{H}_{44}\text{NO}$   $[\text{M}+\text{H}]^+$ : 506.3417. Found: 506.3407.

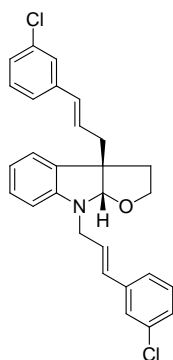

**4ae.** Yellow oil, 94% yield, 95% ee [Daicel Chiralpak AD-H (0.46 cm x 25 cm),  $n$ -hexane/2-propanol = 100/1,  $\nu = 1.0 \text{ mL} \cdot \text{min}^{-1}$ ,  $\lambda = 254 \text{ nm}$ ,  $t$  (major) = 13.30 min,  $t$  (minor) = 23.91 min];  $[\alpha]_{\text{D}}^{19} = +67.8$  ( $c = 1.0$ ,  $\text{CHCl}_3$ ).  $^1\text{H}$  NMR (400 MHz,  $\text{CDCl}_3$ )  $\delta$  2.16-2.20 (m, 2H), 2.62 (dd,  $J = 8.8, 14.0$  Hz, 1H), 2.78 (dd,  $J = 6.4, 14.0$  Hz, 1H), 3.49-3.55 (m, 1H), 3.97-4.01 (m, 1H), 4.05-4.07 (m, 2H), 5.32 (s, 1H), 6.04-6.11 (m, 1H), 6.15-6.22 (m, 1H), 6.34-6.48 (m, 3H), 6.71 (t,  $J = 7.6$  Hz, 1H), 7.02-7.05 (m, 1H), 7.08-7.16 (m, 7H), 7.227-7.230 (m, 2H).  $^{13}\text{C}$  NMR (100 MHz,  $\text{CDCl}_3$ )  $\delta$  40.0, 41.6, 46.4, 56.4, 67.0, 101.1, 105.4, 117.6, 123.3, 124.2, 124.4, 126.0, 126.2, 127.18, 127.24, 127.4, 127.5, 128.4, 129.6, 129.7, 130.2, 131.8, 132.1, 134.3, 134.4, 138.6, 139.0, 150.1. IR (thin film):  $\nu_{\text{max}}$  ( $\text{cm}^{-1}$ ) = 3025, 2965, 2922, 2867, 1681, 1593, 1564, 1488, 1425, 1358, 1261, 1077, 1042, 1011, 961, 875, 773, 740, 683, 635; HRMS (ESI) calcd for  $\text{C}_{28}\text{H}_{26}\text{Cl}_2\text{NO}$   $[\text{M}+\text{H}]^+$ : 462.1386. Found: 462.1374.

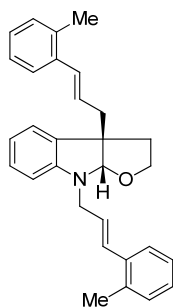

**4af.** Yellow oil, 71% yield, 93% ee [Daicel Chiralpak AD-H (0.46 cm x 25 cm), *n*-hexane/2-propanol = 100/1,  $\nu = 1.0 \text{ mL} \cdot \text{min}^{-1}$ ,  $\lambda = 254 \text{ nm}$ ,  $t$  (major) = 9.95 min,  $t$  (minor) = 10.85 min];  $[\alpha]_{\text{D}}^{18} = +109.6$  ( $c = 1.0$ ,  $\text{CHCl}_3$ ).  $^1\text{H}$  NMR (400 MHz,  $\text{CDCl}_3$ )  $\delta$  2.13-2.20 (m, 2H), 2.22 (s, 3H), 2.25 (s, 3H), 2.64 (dd,  $J = 8.4, 14.0 \text{ Hz}$ , 1H), 2.76-2.82 (m, 1H), 3.51-3.57 (m, 1H), 3.97-4.01 (m, 1H), 4.08-4.10 (m, 2H), 5.39 (s, 1H), 5.90-5.98 (m, 1H), 6.01-6.08 (m, 1H), 6.45 (d,  $J = 7.6 \text{ Hz}$ , 1H), 6.60 (d,  $J = 15.6 \text{ Hz}$ , 1H), 6.68 (t,  $J = 7.2 \text{ Hz}$ , 1H), 6.78 (d,  $J = 16.0 \text{ Hz}$ , 1H), 7.03-7.10 (m, 8H), 7.25-7.29 (m, 2H).  $^{13}\text{C}$  NMR (100 MHz,  $\text{CDCl}_3$ )  $\delta$  19.7, 40.1, 42.1, 47.0, 56.4, 66.9, 101.4, 105.4, 117.3, 123.4, 125.67, 125.7, 126.0, 127.06, 127.1, 127.2, 127.3, 128.2, 129.8, 130.06, 130.09, 131.2, 132.4, 135.0, 135.2, 136.0, 136.5, 150.1. IR (thin film):  $\nu_{\text{max}} (\text{cm}^{-1}) = 2963, 1412, 1261, 1092, 1020, 866, 799, 702, 689, 667$ ; HRMS (ESI) calcd for  $\text{C}_{30}\text{H}_{32}\text{NO}$   $[\text{M}+\text{H}]^+$ : 422.2478. Found: 422.2469.

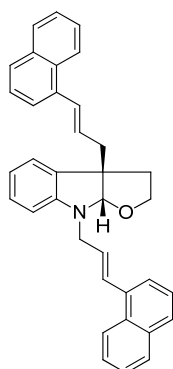

**4ag.** Yellow oil, 86% yield, 89% ee [Daicel Chiralpak AD-H (0.46 cm x 25 cm), *n*-hexane/2-propanol = 100/1,  $\nu = 1.0 \text{ mL} \cdot \text{min}^{-1}$ ,  $\lambda = 254 \text{ nm}$ ,  $t$  (major) = 19.80 min,  $t$  (minor) = 30.59 min];  $[\alpha]_{\text{D}}^{17} = +81.8$  ( $c = 1.0$ ,  $\text{CHCl}_3$ ).  $^1\text{H}$  NMR (400 MHz,  $\text{CDCl}_3$ )  $\delta$  2.18-2.30 (m, 2H), 2.72-2.77 (m, 1H), 2.88-2.94 (m, 1H), 3.56-3.63 (m, 1H), 4.01-4.05 (m, 1H), 4.18-4.19 (m, 2H), 5.51 (s, 1H), 6.04-6.11 (m, 1H), 6.14-6.21 (m,

1H), 6.53 (d,  $J = 7.6$  Hz, 1H), 6.71-6.75 (m, 1H), 7.08-7.16 (m, 3H), 7.19-7.27 (m, 3H), 7.31-7.44 (m, 6H), 7.64 (d,  $J = 8.0$  Hz, 1H), 7.68 (d,  $J = 8.0$  Hz, 1H), 7.75-7.79 (m, 2H), 7.88-7.90 (m, 1H), 7.96-7.98 (m, 1H).  $^{13}\text{C}$  NMR (100 MHz,  $\text{CDCl}_3$ )  $\delta$  40.3, 42.2, 47.0, 56.6, 66.9, 101.5, 105.5, 117.5, 123.5, 123.7, 123.9, 125.46, 125.50, 125.6, 125.8, 125.9, 127.5, 127.6, 128.31, 128.33, 128.9, 129.1, 129.3, 130.6, 130.96, 131.0, 132.4, 133.41, 133.44, 134.6, 135.1, 150.3. IR (thin film):  $\nu_{\text{max}}$  ( $\text{cm}^{-1}$ ) = 2963, 1412, 1261, 1091, 1019, 865, 798, 702, 663; HRMS (ESI) calcd for  $\text{C}_{36}\text{H}_{32}\text{NO}$   $[\text{M}+\text{H}]^+$ : 494.2478. Found: 494.2467.

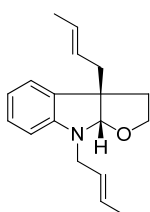

**4ah**<sup>[1]</sup>. Yellow oil, 82% yield, 85% ee [Phenomenex Lu X 5u Cellulose-4 (0.46 cm x 25 cm),  $n$ -hexane/2-propanol = 50/1,  $\nu = 0.51$  mL  $\cdot$  min $^{-1}$ ,  $\lambda = 254$  nm,  $t$  (major) = 7.58 min,  $t$  (minor) = 8.75 min];  $[\alpha]_{\text{D}}^{20} = +102.8$  ( $c = 1.0$ ,  $\text{CHCl}_3$ ).  $^1\text{H}$  NMR (400 MHz,  $\text{CDCl}_3$ )  $\delta$  1.63 (d,  $J = 6.4$  Hz, 3H), 1.68 (d,  $J = 8.0$  Hz, 3H), 2.02-2.14 (m, 2H), 2.38 (dd,  $J = 8.0, 13.6$  Hz, 1H), 2.51 (dd,  $J = 6.0, 13.6$  Hz, 1H), 3.43-3.49 (m, 1H), 3.83-3.84 (m, 2H), 3.90-3.95 (m, 1H), 5.23 (s, 1H), 5.26-5.34 (m, 1H), 5.42-5.54 (m, 2H), 5.62-5.70 (m, 1H), 6.36 (d,  $J = 8.0$  Hz, 1H), 6.63-6.67 (m, 1H), 7.01-7.08 (m, 2H).

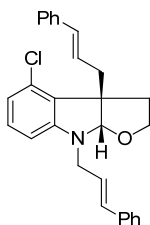

**4ba**. Yellow oil, 93% yield, 96% ee [Daicel Chiralpak AD-H (0.46 cm x 25 cm),  $n$ -hexane/2-propanol = 100/1,  $\nu = 1.0$  mL  $\cdot$  min $^{-1}$ ,  $\lambda = 254$  nm,  $t$  (major) = 10.70 min,  $t$  (minor) = 12.59 min];  $[\alpha]_{\text{D}}^{23} = +70.7$  ( $c = 1.0$ ,  $\text{CHCl}_3$ ).  $^1\text{H}$  NMR (400 MHz,  $\text{CDCl}_3$ )  $\delta$  2.06-2.14 (m, 1H), 2.58-2.63 (m, 2H), 3.28-3.33 (m, 1H), 3.51-3.57 (m, 1H), 3.97-4.06 (m, 3H), 5.40 (s, 1H), 5.86-5.94 (m, 1H), 6.04-6.10 (m, 1H), 6.27 (d,  $J =$

8.0 Hz, 1H), 6.44 (d,  $J = 13.6$  Hz, 1H), 6.48 (d,  $J = 10.5$  Hz, 1H), 6.62 (d,  $J = 8.8$  Hz, 1H), 6.99 (t,  $J = 8.0$  Hz, 1H), 7.09-7.12 (m, 2H), 7.16-7.23 (m, 8H).  $^{13}\text{C}$  NMR (100 MHz,  $\text{CDCl}_3$ )  $\delta$  37.8, 39.2, 46.4, 57.4, 66.9, 100.7, 103.7, 118.2, 125.0, 126.0, 126.1, 126.3, 127.1, 127.31, 127.34, 128.4, 128.5, 129.8, 130.2, 131.8, 132.8, 136.5, 137.2, 152.0. IR (thin film):  $\nu_{\text{max}}$  ( $\text{cm}^{-1}$ ) = 2963, 1598, 1261, 1091, 1019, 965, 867, 799, 733, 692; HRMS (ESI) calcd for  $\text{C}_{28}\text{H}_{27}\text{ClNO}$   $[\text{M}+\text{H}]^+$ : 428.1776. Found: 428.1765.

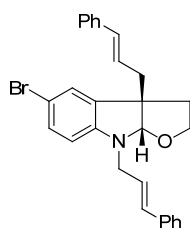

**4ca.** Yellow oil, 83% yield, 94% ee [Daicel Chiralpak AD-H (0.46 cm x 25 cm),  $n$ -hexane/2-propanol = 100/1,  $\nu = 1.0 \text{ mL} \cdot \text{min}^{-1}$ ,  $\lambda = 254 \text{ nm}$ ,  $t$  (major) = 15.00 min,  $t$  (minor) = 19.06 min];  $[\alpha]_{\text{D}}^{23} = +27.5$  ( $c = 1.0$ ,  $\text{CHCl}_3$ ).  $^1\text{H}$  NMR (400 MHz,  $\text{CDCl}_3$ )  $\delta$  2.09-2.21 (m, 2H), 2.59 (dd,  $J = 8.8, 13.6$  Hz, 1H), 2.78 (dd,  $J = 6.0, 14.0$  Hz, 1H), 3.48-3.54 (m, 1H), 3.96-4.08 (m, 3H), 5.35 (s, 1H), 5.97-6.14 (m, 2H), 6.28 (d,  $J = 8.4$  Hz, 1H), 6.44 (d,  $J = 15.6$  Hz, 1H), 6.50 (d,  $J = 15.6$  Hz, 1H), 7.15-7.26 (m, 12H).  $^{13}\text{C}$  NMR (100 MHz,  $\text{CDCl}_3$ )  $\delta$  40.1, 41.5, 46.5, 56.5, 66.9, 101.0, 106.7, 108.8, 125.1, 125.3, 126.1, 126.2, 126.28, 126.29, 127.4, 128.4, 128.5, 130.9, 131.9, 133.4, 134.8, 136.5, 137.0, 149.3. IR (thin film):  $\nu_{\text{max}}$  ( $\text{cm}^{-1}$ ) = 2963, 1412, 1260, 1090, 1019, 865, 798, 702, 664; HRMS (ESI) calcd for  $\text{C}_{28}\text{H}_{27}\text{BrNO}$   $[\text{M}+\text{H}]^+$ : 472.1271. Found: 472.1258.

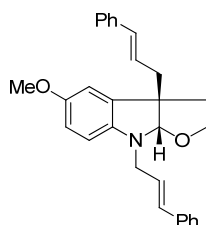

**4da.** Yellow oil, 93% yield, 95% ee [Daicel Chiralpak AD-H (0.46 cm x 25 cm),  $n$ -hexane/2-propanol = 100/1,  $\nu = 1.0 \text{ mL} \cdot \text{min}^{-1}$ ,  $\lambda = 254 \text{ nm}$ ,  $t$  (major) = 28.16 min,  $t$  (minor) = 36.10 min];  $[\alpha]_{\text{D}}^{18} = +58.9$  ( $c = 1.0$ ,  $\text{CHCl}_3$ ).  $^1\text{H}$  NMR (400 MHz,  $\text{CDCl}_3$ )  $\delta$



2.12-2.23 (m, 2H), 2.61 (dd,  $J = 8.4, 13.6$  Hz, 1H), 2.77 (dd,  $J = 6.4, 14.8$  Hz, 1H), 3.51-3.57 (m, 1H), 3.73 (s, 3H), 3.96-4.04 (m, 3H), 5.34 (s, 1H), 6.04-6.12 (m, 1H), 6.15-6.22 (m, 1H), 6.35 (d,  $J = 8.4$  Hz, 1H), 6.44 (d,  $J = 15.6$  Hz, 1H), 6.54 (d,  $J = 16.0$  Hz, 1H), 6.64-6.66 (m, 1H), 6.74 (d,  $J = 2.4$  Hz, 1H), 7.18-7.27 (m, 10H).  $^{13}\text{C}$  NMR (100 MHz,  $\text{CDCl}_3$ )  $\delta$  39.9, 41.6, 47.4, 56.0, 56.6, 67.0, 101.8, 105.8, 111.0, 112.4, 125.9, 126.1, 126.3, 127.2, 127.3, 128.4, 128.5, 128.7, 131.6, 133.1, 134.0, 136.8, 137.2, 144.6, 152.5. IR (thin film):  $\nu_{\text{max}}$  ( $\text{cm}^{-1}$ ) = 2963, 1412, 1260, 1090, 1019, 865, 798, 688; HRMS (ESI) calcd for  $\text{C}_{29}\text{H}_{30}\text{NO}_2$   $[\text{M}+\text{H}]^+$ : 424.2271. Found: 424.2262.

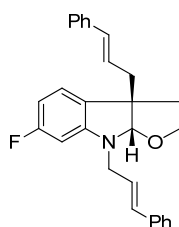

**4ea.** Yellow oil, 91% yield, 91% ee [Daicel Chiralpak AD-H (0.46 cm x 25 cm),  $n$ -hexane/2-propanol = 100/1,  $\nu = 1.0$  mL  $\cdot$  min $^{-1}$ ,  $\lambda = 254$  nm,  $t$  (major) = 13.46 min,  $t$  (minor) = 16.36 min];  $[\alpha]_{\text{D}}^{23} = +96.9$  ( $c = 1.0$ ,  $\text{CHCl}_3$ ).  $^1\text{H}$  NMR (400 MHz,  $\text{CDCl}_3$ )  $\delta$  2.09-2.21 (m, 2H), 2.59 (dd,  $J = 8.8, 14.0$  Hz, 1H), 2.75-2.80 (m, 1H), 3.49-3.56 (m, 1H), 3.97-4.09 (m, 3H), 5.37 (s, 1H), 6.00-6.15 (m, 3H), 6.32-6.36 (m, 1H), 6.44 (d,  $J = 16.0$  Hz, 1H), 6.52 (d,  $J = 16.0$  Hz, 1H), 6.95-6.98 (m, 1H), 7.18-7.27 (m, 10H).  $^{13}\text{C}$  NMR (100 MHz,  $\text{CDCl}_3$ )  $\delta$  40.3, 41.9, 46.4, 55.9, 67.0, 93.4 ( $J = 27.0$  Hz), 101.6, 103.1 ( $J = 22.9$  Hz), 123.7 ( $J = 10.6$  Hz), 125.1, 125.7, 126.1, 126.3, 127.3, 127.4, 127.7, 128.5, 128.6, 132.0, 133.2, 136.6, 137.1, 151.7 ( $J = 12.2$  Hz), 164.0 ( $J = 241.7$  Hz). IR (thin film):  $\nu_{\text{max}}$  ( $\text{cm}^{-1}$ ) = 2963, 1413, 1261, 1091, 1019, 865, 798, 688, 664; HRMS (ESI) calcd for  $\text{C}_{28}\text{H}_{27}\text{FNO}$   $[\text{M}+\text{H}]^+$ : 412.2071. Found: 412.2065.

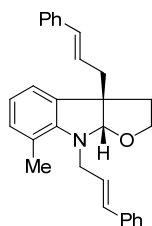

**4fa.** Yellow oil, 90% yield, 83% ee [Daicel Chiralpak AD-H (0.46 cm x 25 cm), *n*-hexane/2-propanol = 100/1,  $\nu = 1.0 \text{ mL} \cdot \text{min}^{-1}$ ,  $\lambda = 254 \text{ nm}$ ,  $t$  (major) = 13.86 min,  $t$  (minor) = 14.75 min];  $[\alpha]_{\text{D}}^{23} = +88.3$  ( $c = 1.0$ ,  $\text{CHCl}_3$ ).  $^1\text{H}$  NMR (400 MHz,  $\text{CDCl}_3$ )  $\delta$  2.08-2.12 (m, 1H), 2.16-2.23 (m, 1H), 2.38 (s, 3H), 2.58-2.64 (m, 1H), 2.72-2.77 (m, 1H), 3.52-3.58 (m, 1H), 3.92-3.96 (m, 1H), 4.14-4.20 (m, 1H), 4.27-4.33 (m, 1H), 5.26 (s, 1H), 6.05-6.12 (m, 1H), 6.19-6.26 (m, 1H), 6.41 (d,  $J = 16.0 \text{ Hz}$ , 1H), 6.52 (d,  $J = 17.6 \text{ Hz}$ , 1H), 6.72 (t,  $J = 7.2 \text{ Hz}$ , 1H), 6.89 (d,  $J = 7.2 \text{ Hz}$ , 1H), 6.96 (d,  $J = 7.2 \text{ Hz}$ , 1H), 7.15-7.26 (m, 10H).  $^{13}\text{C}$  NMR (100 MHz,  $\text{CDCl}_3$ )  $\delta$  19.1, 40.1, 42.3, 50.3, 56.0, 66.4, 103.0, 118.5, 119.2, 121.3, 126.0, 126.1, 126.3, 127.2, 127.29, 127.32, 128.4, 128.5, 131.4, 131.5, 133.2, 134.1, 136.8, 137.2, 148.5. IR (thin film):  $\nu_{\text{max}} (\text{cm}^{-1}) = 2963, 2869, 1594, 1494, 1469, 1422, 1358, 1327, 1294, 1260, 1222, 1088, 1019, 964, 866, 798, 739, 692$ ; HRMS (ESI) calcd for  $\text{C}_{29}\text{H}_{30}\text{NO}_2$   $[\text{M}+\text{H}]^+$ : 408.2322. Found: 408.2312.

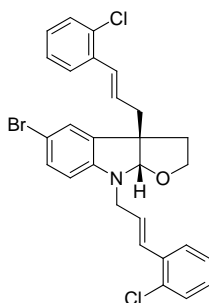

**4ci.** Yellow oil, 90% yield, 98% ee [Daicel Chiralpak AD-H (0.46 cm x 25 cm), *n*-hexane/2-propanol = 100/1,  $\nu = 1.0 \text{ mL} \cdot \text{min}^{-1}$ ,  $\lambda = 254 \text{ nm}$ ,  $t$  (major) = 13.82 min,  $t$  (minor) = 27.51 min];  $[\alpha]_{\text{D}}^{22} = +21.8$  ( $c = 1.0$ ,  $\text{CHCl}_3$ ).  $^1\text{H}$  NMR (300 MHz,  $\text{CDCl}_3$ )  $\delta$  2.10-2.25 (m, 2H), 2.65 (dd,  $J = 9.0, 14.1 \text{ Hz}$ , 1H), 2.83 (dd,  $J = 5.7, 13.5 \text{ Hz}$ , 1H), 3.50-3.58 (m, 1H), 4.01 (t,  $J = 7.5 \text{ Hz}$ , 1H), 4.07 (d,  $J = 5.4 \text{ Hz}$ , 2H), 5.39 (s, 1H), 5.91-6.12 (m, 2H), 6.31 (d,  $J = 7.8 \text{ Hz}$ , 1H), 6.82 (d,  $J = 15.6 \text{ Hz}$ , 1H), 6.92 (d,  $J = 15.6 \text{ Hz}$ , 1H), 7.08-7.19 (m, 6H), 7.25-7.30 (m, 4H).  $^{13}\text{C}$  NMR (100 MHz,  $\text{CDCl}_3$ )  $\delta$  40.0, 41.6, 46.8, 56.4, 66.9, 101.3, 106.8, 108.9, 126.2, 126.7, 126.8, 128.2, 128.3, 128.4, 129.47, 129.51, 129.9, 131.0, 132.6, 132.8, 134.7, 134.8, 135.2, 149.1. IR (thin film):  $\nu_{\text{max}} (\text{cm}^{-1}) = 2963, 1261, 1092, 1020, 865, 799, 685$ ; HRMS (ESI) calcd for

$C_{28}H_{25}BrCl_2NO$   $[M+H]^+$ : 540.0491. Found: 540.0465.

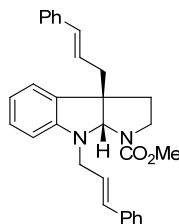

**4ga.** Yellow oil, 87% yield, 90% ee [Daicel Chiralpak AD-H (0.46 cm x 25 cm), *n*-hexane/2-propanol = 80/20,  $\nu = 0.5 \text{ mL} \cdot \text{min}^{-1}$ ,  $\lambda = 254 \text{ nm}$ ,  $t$  (major) = 10.99 min,  $t$  (minor) = 12.55 min];  $[\alpha]_D^{17} = +218.3$  ( $c = 1.0$ ,  $\text{CHCl}_3$ ).  $^1\text{H}$  NMR (300 MHz,  $\text{CDCl}_3$ )  $\delta$  2.03-2.14 (m, 2H), 2.53-2.61 (m, 1H), 2.66-2.72 (m, 1H), 3.08-3.17 (m, 1H), 3.66-4.34 (m, 6H), 5.38 and 5.54 (s, 1H), 5.95-6.19 (m, 2H), 6.39-6.58 (m, 3H), 6.67-6.71 (m, 1H), 7.04-7.12 (m, 2H), 7.22-7.23 (m, 10H).  $^{13}\text{C}$  NMR (100 MHz,  $\text{CDCl}_3$ )  $\delta$  37.2, 37.4, 42.4, 42.6, 45.4, 45.6, 48.2, 52.4, 56.2, 57.4, 60.4, 83.9, 84.4, 106.4, 117.3, 117.6, 122.8, 125.3, 125.4, 126.05, 126.10, 126.2, 126.9, 127.1, 127.2, 128.4, 128.5, 131.2, 131.9, 132.2, 133.4, 136.7, 137.0, 137.1, 149.99, 155.05, 156.0. IR (thin film):  $\nu_{\text{max}}$  ( $\text{cm}^{-1}$ ) = 2963, 1261, 1091, 1020, 865, 798, 701, 663; HRMS (ESI) calcd for  $C_{30}H_{31}N_2O_2$   $[M+H]^+$ : 451.2380. Found: 451.2371.

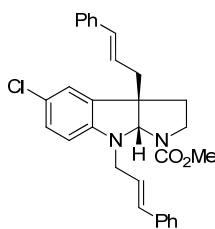

**4ha.** Yellow oil, 92% yield, 88% ee [Daicel Chiralpak AD-H (0.46 cm x 25 cm), *n*-hexane/2-propanol = 80/20,  $\nu = 0.5 \text{ mL} \cdot \text{min}^{-1}$ ,  $\lambda = 254 \text{ nm}$ ,  $t$  (major) = 10.78 min,  $t$  (minor) = 12.25 min];  $[\alpha]_D^{25} = +140.9$  ( $c = 1.0$ ,  $\text{CHCl}_3$ ).  $^1\text{H}$  NMR (400 MHz,  $\text{CDCl}_3$ )  $\delta$  2.06-2.10 (m, 2H), 2.54 (dd,  $J = 8.8, 14.0 \text{ Hz}$ , 1H), 2.65-2.70 (m, 1H), 3.08-3.15 (m, 1H), 3.66 and 3.71 (s, 3H), 3.78-4.29 (m, 3H), 5.40 and 5.56 (s, 1H), 5.95-6.13 (m, 2H), 6.34 (d,  $J = 8.0 \text{ Hz}$ , 1H), 6.42 (d,  $J = 16.0 \text{ Hz}$ , 1H), 6.50-6.54 (m, 1H), 7.00-7.04 (m, 2H), 7.20-7.23 (m, 10H).  $^{13}\text{C}$  NMR (100 MHz,  $\text{CDCl}_3$ )  $\delta$  37.2, 37.4, 42.2, 42.4, 45.3, 45.5, 48.2, 52.5, 56.2, 57.5, 83.9, 84.4, 107.1, 121.8, 122.1, 123.0, 124.6, 124.8,

125.4, 126.1, 126.2, 127.2, 127.3, 128.3, 128.4, 128.5, 131.5, 133.8, 134.1, 136.5, 136.8, 136.9, 148.6, 154.9, 155.9. IR (thin film):  $\nu_{\max}$  ( $\text{cm}^{-1}$ ) = 2953, 1736, 1698, 1600, 1489, 1446, 1382, 1318, 1240, 1211, 1152, 1098, 1045, 1029, 965, 936, 877, 802, 766, 736, 693; HRMS (ESI) calcd for  $\text{C}_{30}\text{H}_{30}\text{ClN}_2\text{O}_2$   $[\text{M}+\text{H}]^+$ : 485.1990. Found: 485.1981.

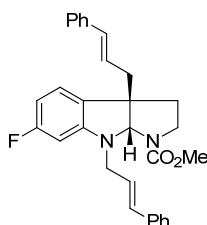

**4ia.** Yellow oil, 97% yield, 86% ee [Daicel Chiralpak AD-H (0.46 cm x 25 cm), *n*-hexane/2-propanol = 80/20,  $\nu$  = 0.5 mL  $\cdot$  min $^{-1}$ ,  $\lambda$  = 254 nm, *t* (major) = 11.23 min, *t* (minor) = 13.00 min];  $[\alpha]_{\text{D}}^{26}$  = +147.9 (*c* = 1.0,  $\text{CHCl}_3$ ).  $^1\text{H}$  NMR (400 MHz,  $\text{CDCl}_3$ )  $\delta$  2.07-2.09 (m, 2H), 2.50-2.56 (m, 1H), 2.62-2.67 (m, 1H), 3.08-3.15 (m, 1H), 3.65 and 3.70 (s, 3H), 3.75-4.29 (m, 3H), 5.38 and 5.55 (s, 1H), 5.99-6.16 (m, 2H), 6.34-6.56 (m, 3H), 6.75-6.79 (m, 2H), 7.19-7.22 (m, 10H).  $^{13}\text{C}$  NMR (100 MHz,  $\text{CDCl}_3$ )  $\delta$  36.9, 37.3, 42.0, 42.2, 45.3, 45.4, 48.7, 52.3, 56.2, 57.4, 84.4, 84.9, 106.5, 106.6, 110.2, 110.5, 114.2, 114.4, 124.6, 124.7, 125.8, 126.0, 126.2, 127.1, 127.2, 128.3, 128.4, 131.4, 133.6, 136.6, 136.9, 146.1, 154.9, 155.1, 155.9, 157.4. IR (thin film):  $\nu_{\max}$  ( $\text{cm}^{-1}$ ) = 2953, 1736, 1697, 1600, 1492, 1445, 1381, 1264, 1241, 1204, 1138, 1104, 1072, 1045, 964, 907, 867, 802, 767, 734, 693; HRMS (ESI) calcd for  $\text{C}_{30}\text{H}_{31}\text{FN}_2\text{O}_2$   $[\text{M}+\text{H}]^+$ : 469.2286. Found: 469.2272.

### Synthesis of (-)-debromoflustramine B

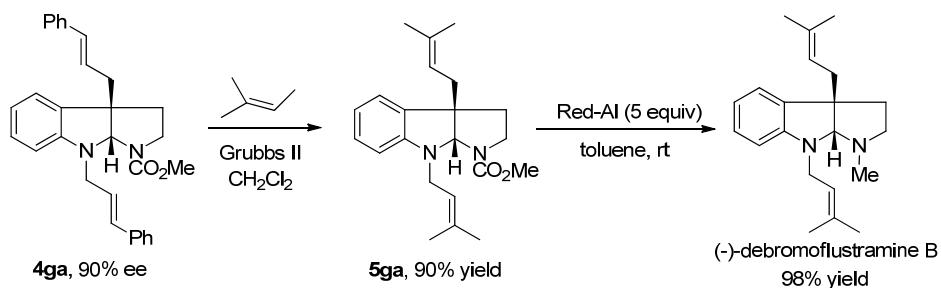

A 25 mL flame-dried Schlenk tube was cooled to room temperature and filled with argon. To this flask was added **4ga** (58.5 mg, 0.13 mmol). The vessel was placed

under vacuum and the atmosphere exchanged with argon three times before the addition of  $\text{CH}_2\text{Cl}_2$  (5 mL) and 2-methyl-2-butene (91.0 mg, 1.30 mmol). Then the mixture was heated to reflux after Grubbs II (11.1 mg, 0.013 mmol) was added. After the reaction was almost complete (monitored by TLC), the reaction mixture was quenched with water, extracted with ether. The combined organic layers were washed with brine, dried over  $\text{Na}_2\text{SO}_4$ , and filtered. The solvent was removed under reduced pressure, and the residue was purified by silica gel column chromatography (PE/EA = 15/1) to afford the desired product **5ga**<sup>[2]</sup> as a colorless liquid (41.9 mg, 90% yield). Analytical data for **5ga**:  $[\alpha]_{\text{D}}^{28} = +281.6$  ( $c = 1.0$ ,  $\text{CHCl}_3$ ).  $^1\text{H}$  NMR (300 MHz,  $\text{CDCl}_3$ )  $\delta$  1.55 (s, 3H), 1.68-1.76 (m, 9H), 2.03 (s, 2H), 2.38 (d,  $J = 7.2$  Hz, 2H), 3.02-3.11 (m, 1H), 3.70-4.22 (m, 6H), 5.05-5.34 (m, 3H), 6.36-6.39 (m, 1H), 6.45 (t,  $J = 7.2$  Hz, 1H), 6.98 (d,  $J = 7.5$  Hz, 1H), 7.07 (t,  $J = 6.9$  Hz, 1H).

A flame-dried 25mL round bottom flask was cooled to room temperature and filled with argon. To this flask was added **5ga** (35.4 mg, 0.1 mmol), the atmosphere exchanged with argon three times before the addition of toluene (5 mL) and the slow addition of Red-Al (0.5 mmol, 70 wt% in toluene, 0.14 mL)<sup>[3]</sup>. After the reaction was complete (monitored by TLC), the reaction mixture was quenched with water, extracted with ether. The combined organic layers were washed with brine, dried over  $\text{Na}_2\text{SO}_4$ , and filtered. The solvent was removed under reduced pressure, and the residue was purified by silica gel column chromatography (PE/EA = 1/2) to afford the desired product (-)-**debromoflustramine B** as a colorless liquid (29.0 mg, 98% yield). Analytical data for (-)-**debromoflustramine B**:  $[\alpha]_{\text{D}}^{25} = +85.68$  ( $c = 1.0$ ,  $\text{CHCl}_3$ ).  $^1\text{H}$  NMR (300 MHz,  $\text{CDCl}_3$ )  $\delta$  1.58 (s, 3H), 1.65 (s, 3H), 1.70 (s, 3H), 1.71 (s, 3H), 1.89-1.95 (m, 1H), 2.03-2.12 (m, 1H), 2.43 (d,  $J = 7.2$  Hz, 2H), 2.50 (s, 3H), 2.54-2.61 (m, 1H), 2.67-2.74 (m, 1H), 3.80 (dd,  $J = 6.9, 15.9$  Hz, 1H), 3.94 (dd,  $J = 5.7, 15.9$  Hz, 1H), 4.30 (s, 1H), 4.96 (t,  $J = 6.9$  Hz, 1H), 5.17 (t,  $J = 6.0$  Hz, 1H), 6.42 (d,  $J = 7.5$  Hz, 1H), 6.66 (t,  $J = 7.5$  Hz, 1H), 6.98 (d,  $J = 7.2$  Hz, 1H), 7.05 (t,  $J = 7.8$  Hz, 1H).

## References

- [1] X. Zhang, Z.-P. Yang, C. Liu and S.-L. You, *Chem. Sci.*, 2013, **4**, 3239.
- [2] (a) A. V. Dix, C. M. Meseck, A. J. Lowe and M. O. Mitchell, *Bioorg. Med. Chem. Lett.*, 2006, **16**, 2522; (b) A. W. Schammel, B. W. Boal, L. Zu, T. Mesganaw and N. K. Garg, *Tetrahedron*, 2010, **66**, 4687.
- [3] (a) G. H. Tan, X. Zhu and A. Ganesan, *Org. Lett.*, 2003, **5**, 1801; (b) T. Newhouse and P. S. Baran, *J. Am. Chem. Soc.*, 2008, **130**, 10886; (c) Z. Zhang and J. C. Antilla, *Angew. Chem. Int. Ed.*, 2012, **51**, 11778.

Compound **4aa**'s <sup>1</sup>H NMR Spectra

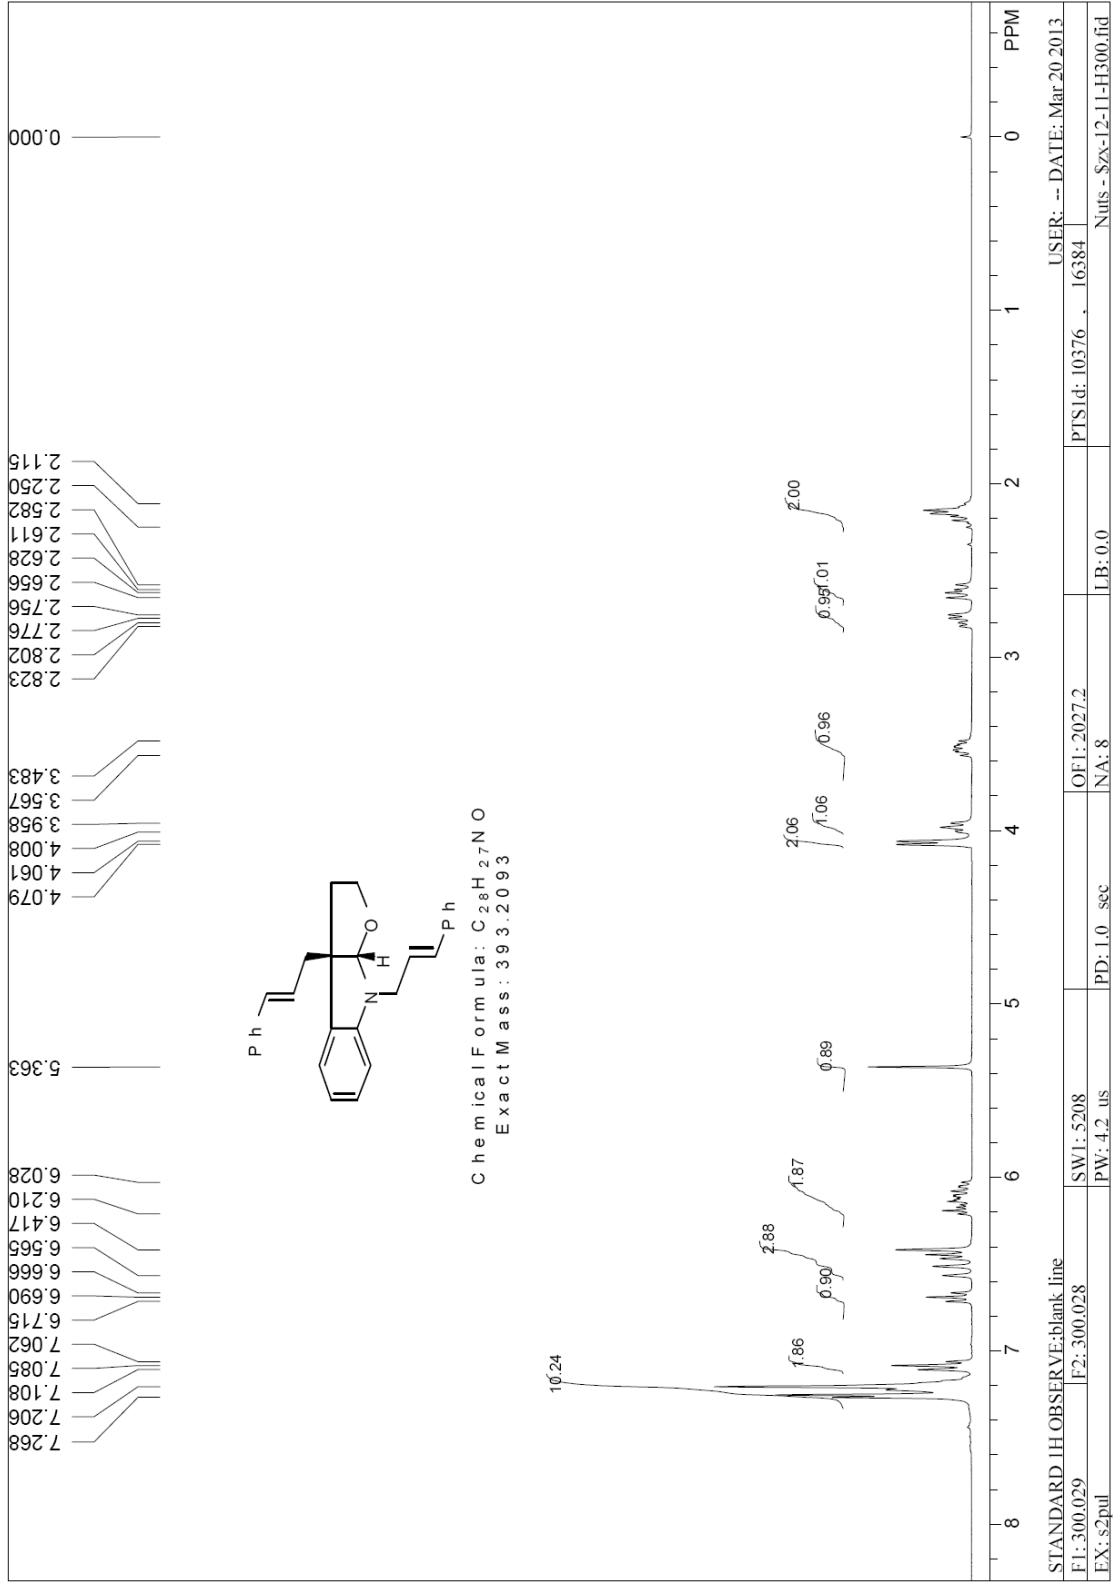

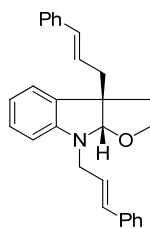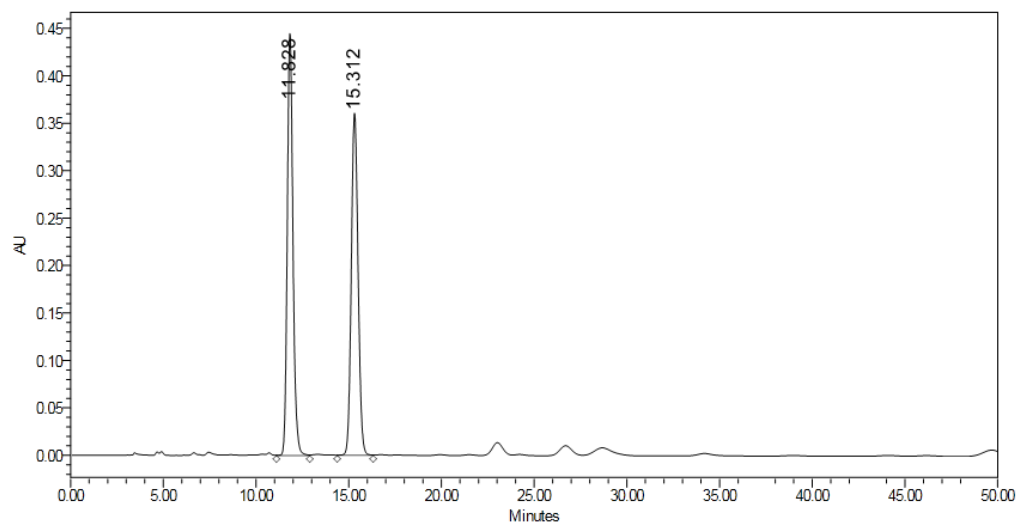

|   | RT<br>(min) | Area<br>( $\mu\text{V}\cdot\text{sec}$ ) | % Area |
|---|-------------|------------------------------------------|--------|
| 1 | 11.828      | 9452089                                  | 50.74  |
| 2 | 15.312      | 9178118                                  | 49.26  |

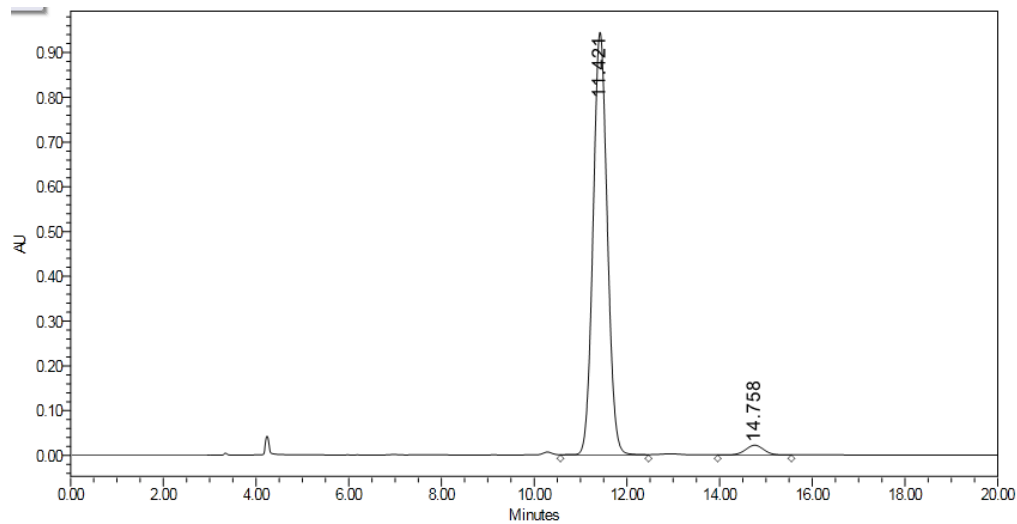

|   | RT<br>(min) | Area<br>( $\mu\text{V}\cdot\text{sec}$ ) | % Area |
|---|-------------|------------------------------------------|--------|
| 1 | 11.421      | 20145695                                 | 97.14  |
| 2 | 14.758      | 593923                                   | 2.86   |



Compound **4ab**'s  $^1\text{H}$  NMR Spectra

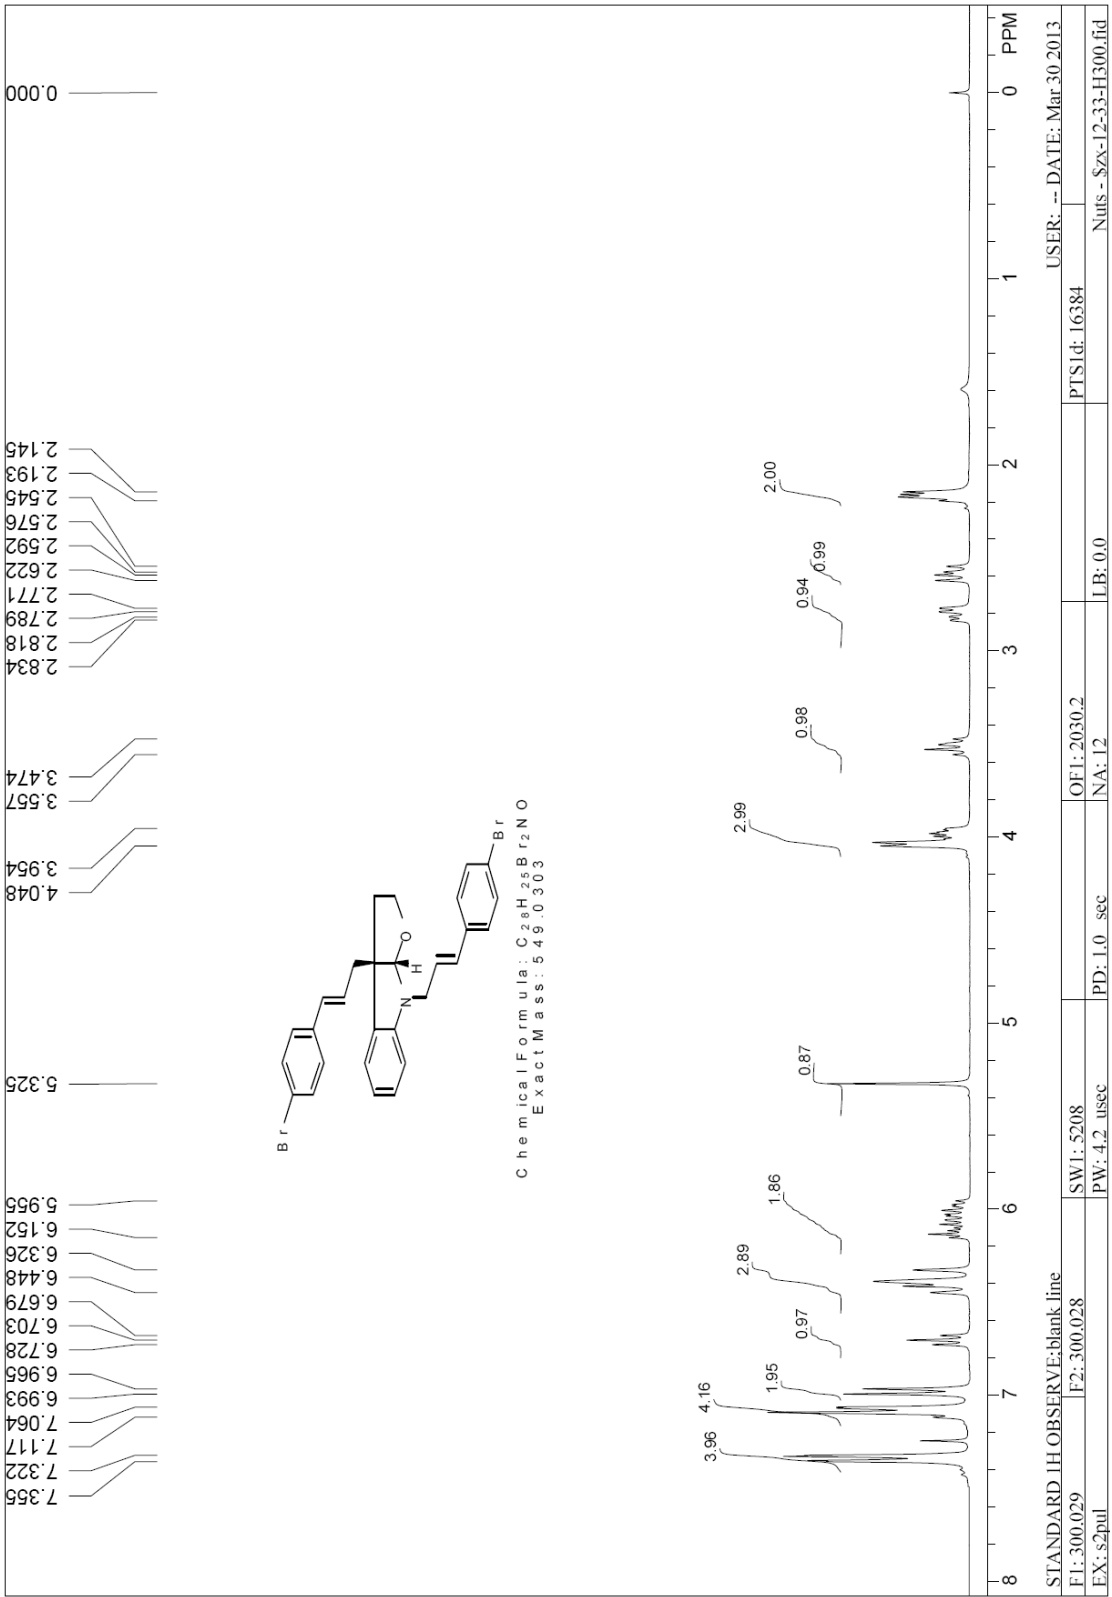

Compound **4ab**'s  $^{13}\text{C}$  NMR Spectra

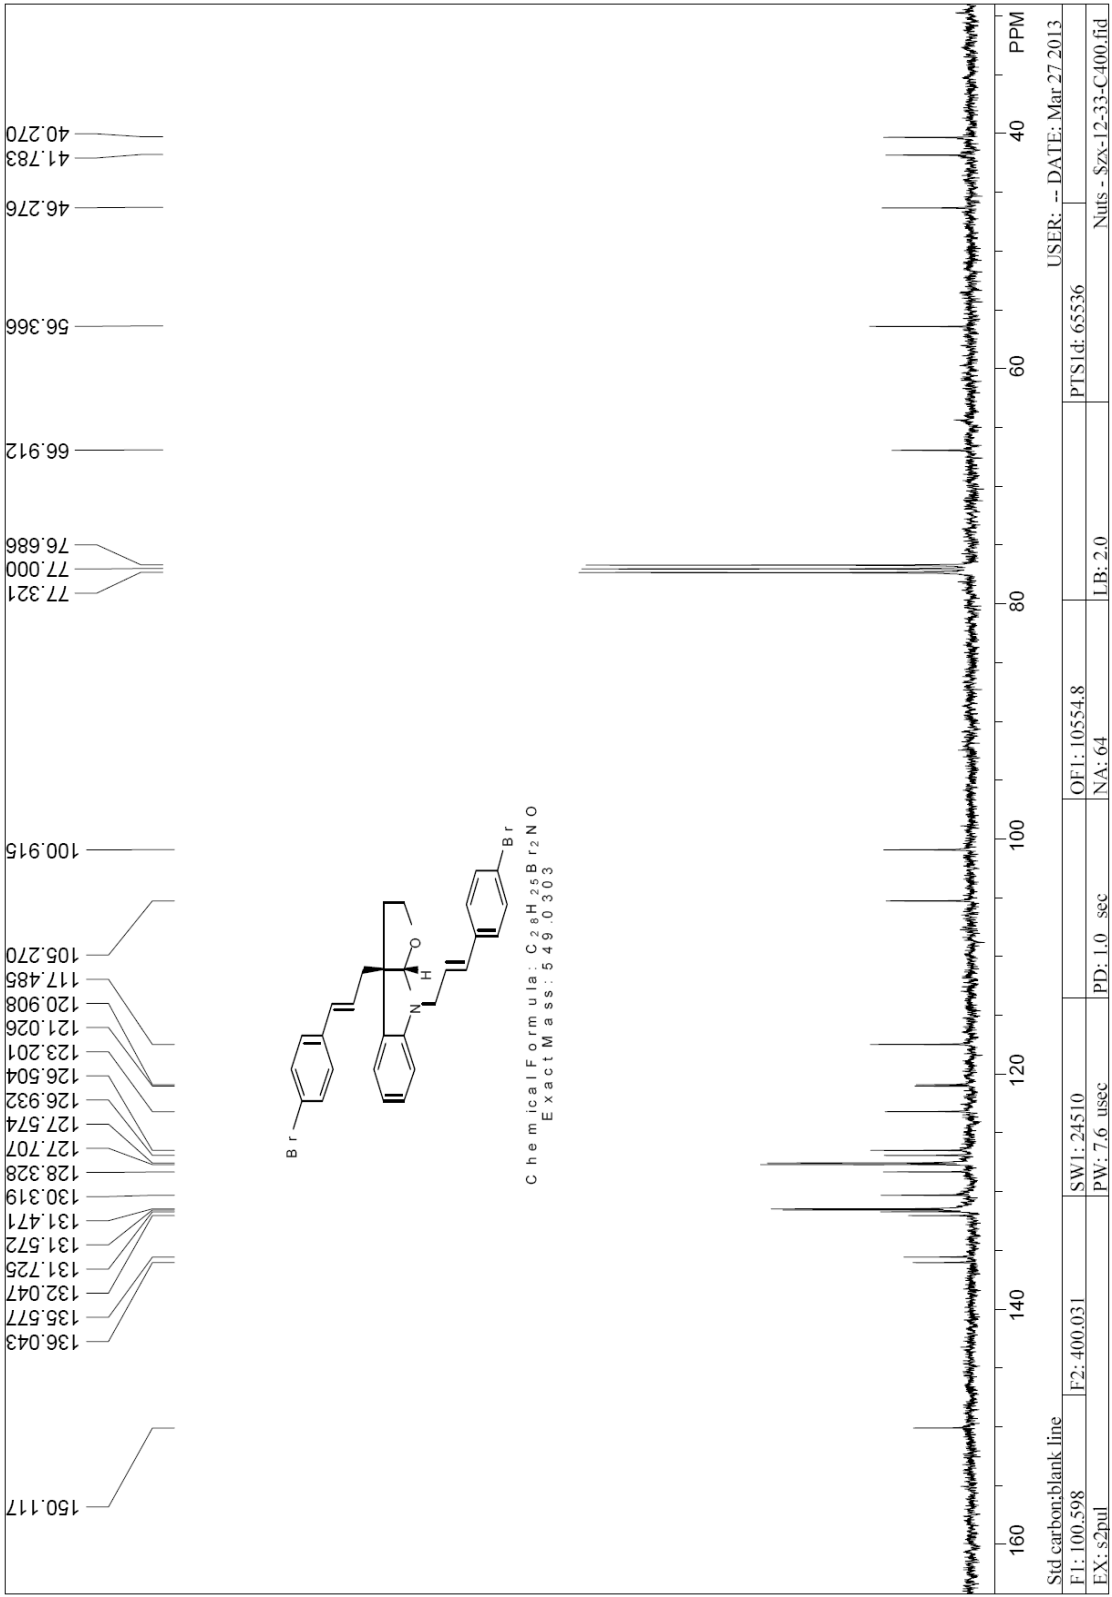

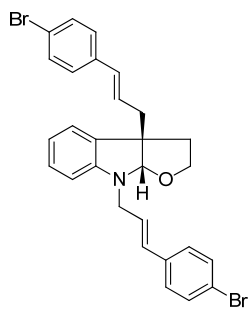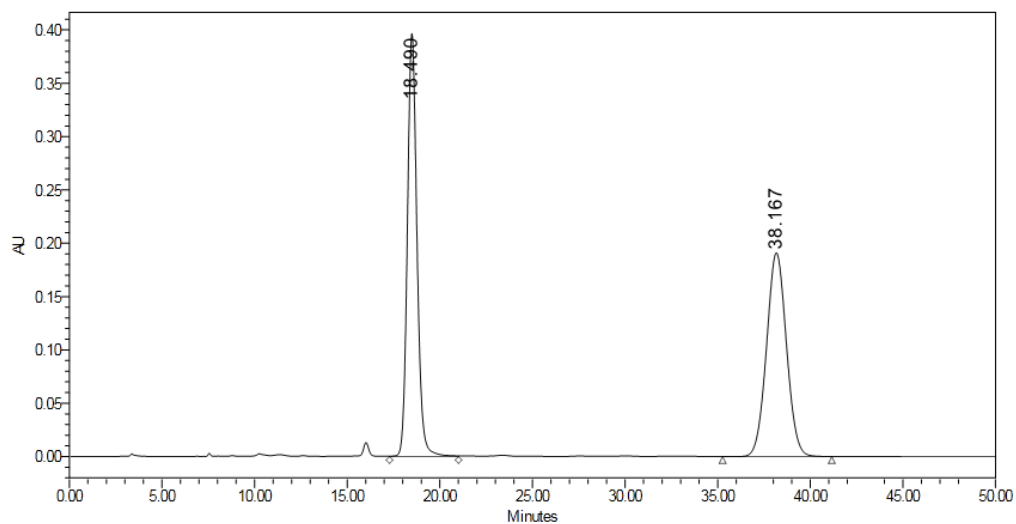

|   | RT (min) | Area (μV*sec) | % Area |
|---|----------|---------------|--------|
| 1 | 18.490   | 14321186      | 50.09  |
| 2 | 38.167   | 14270843      | 49.91  |

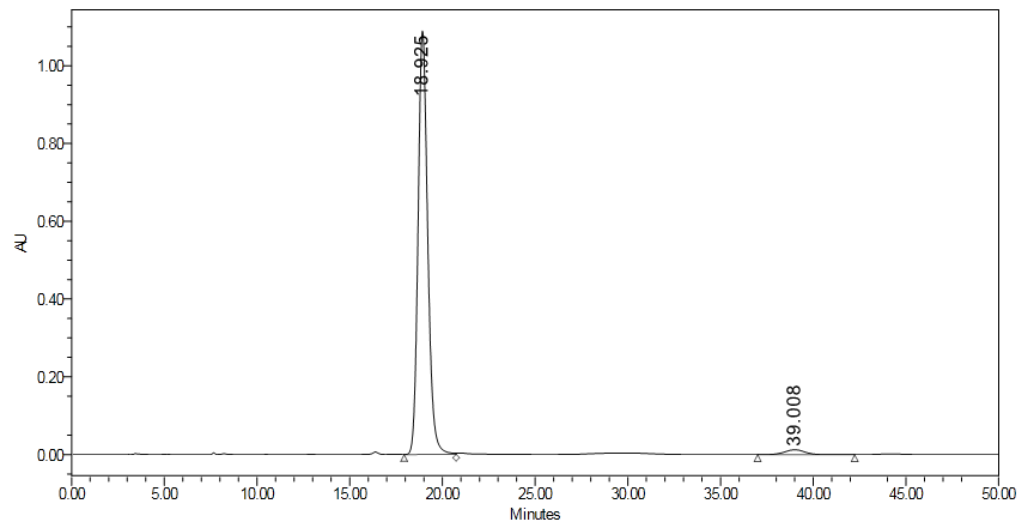

|   | RT (min) | Area (μV*sec) | % Area |
|---|----------|---------------|--------|
| 1 | 18.925   | 39389524      | 97.70  |
| 2 | 39.008   | 926642        | 2.30   |

Compound **4ac**'s  $^1\text{H}$  NMR Spectra

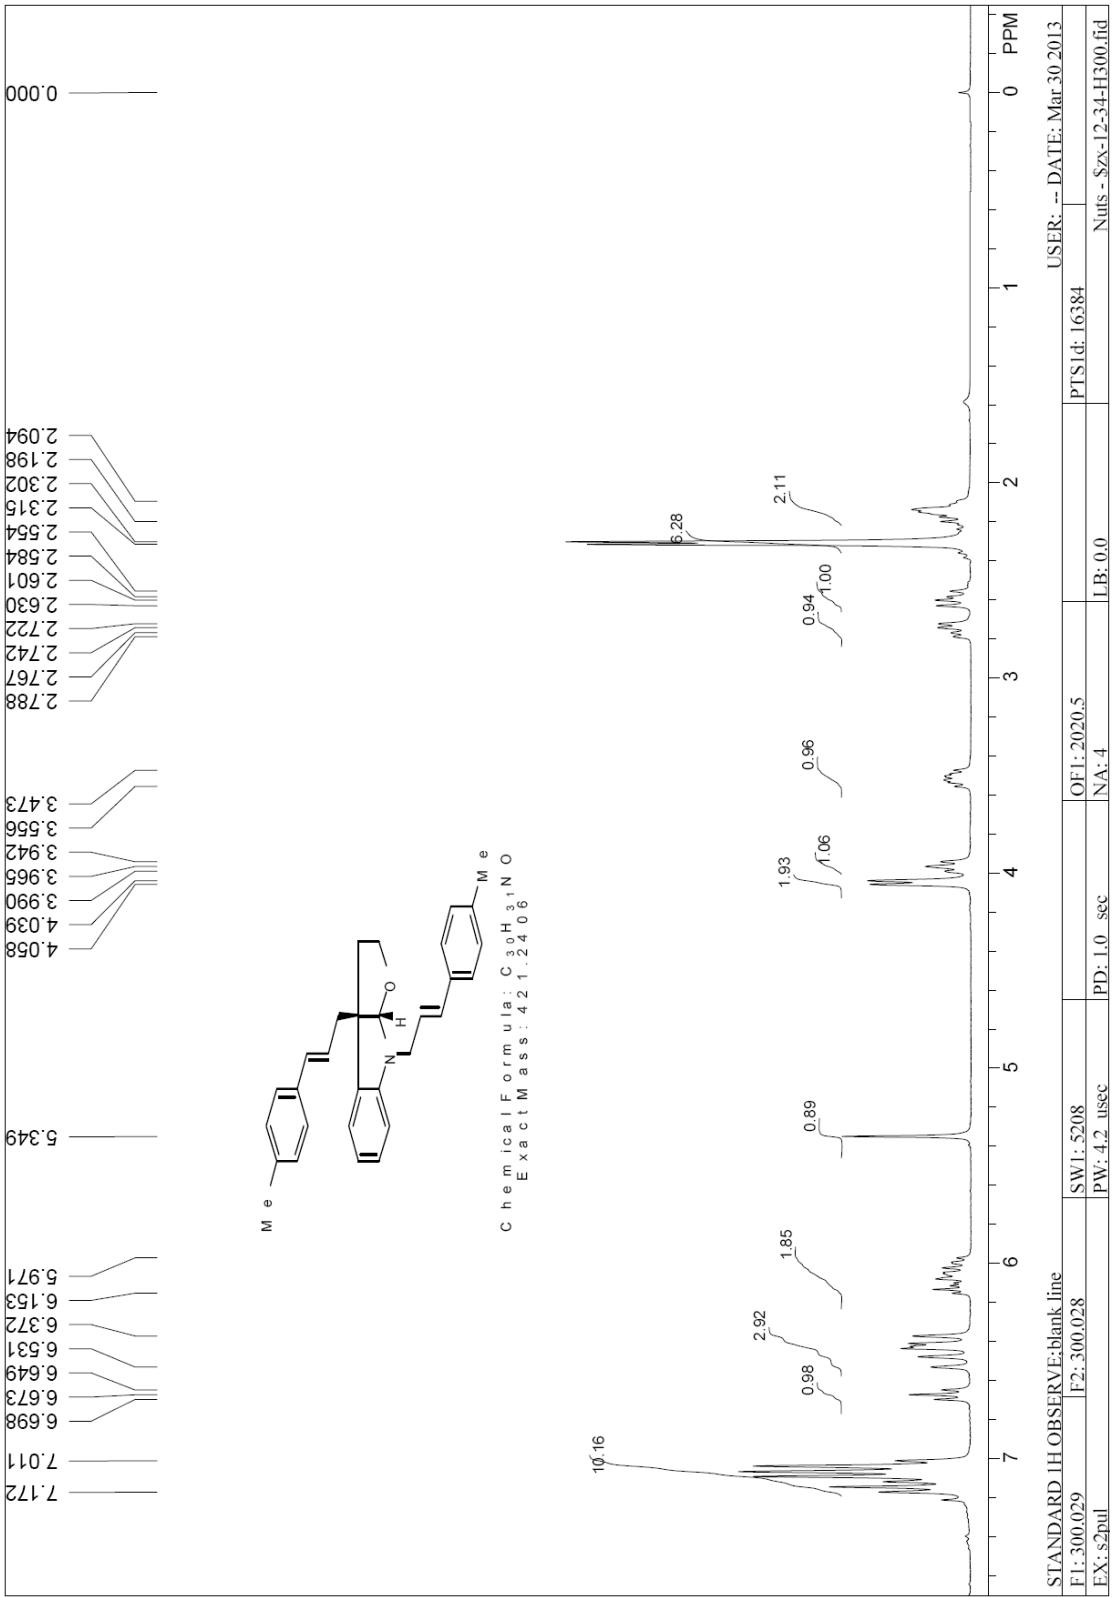

Compound **4ac**'s <sup>13</sup>C NMR Spectra

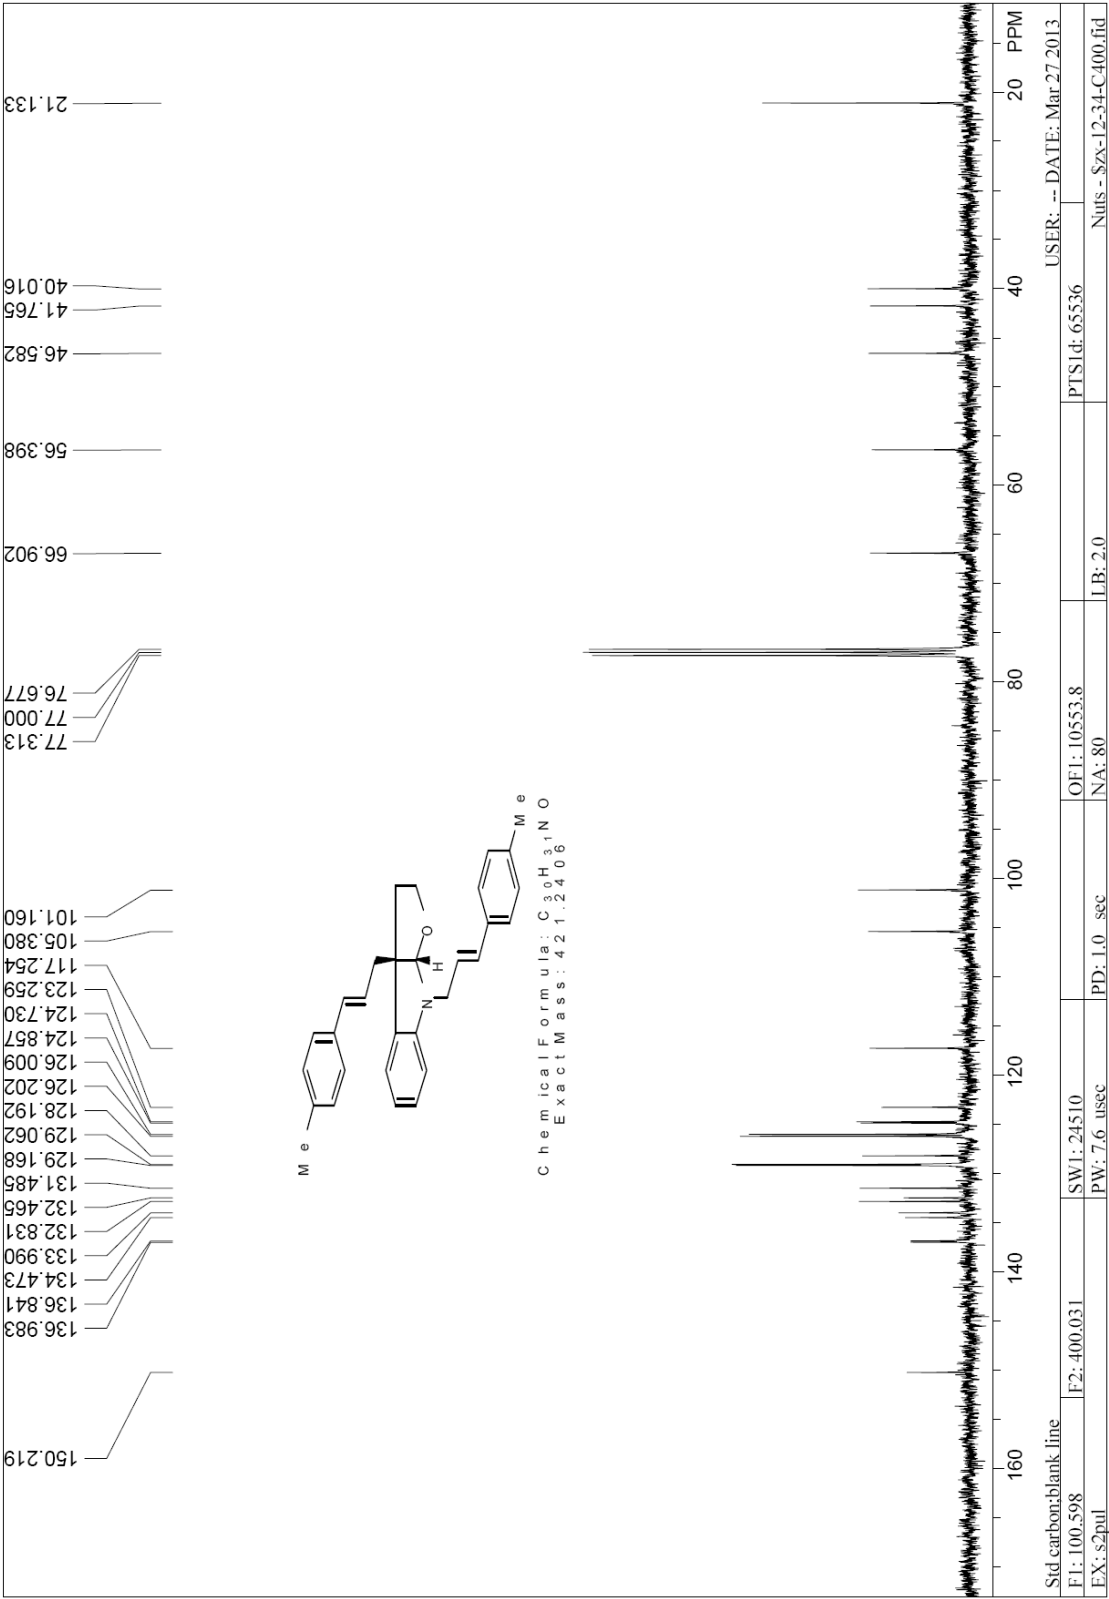

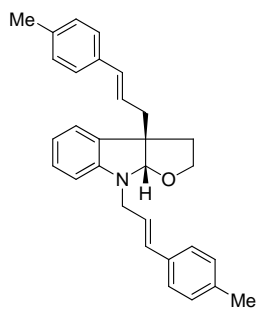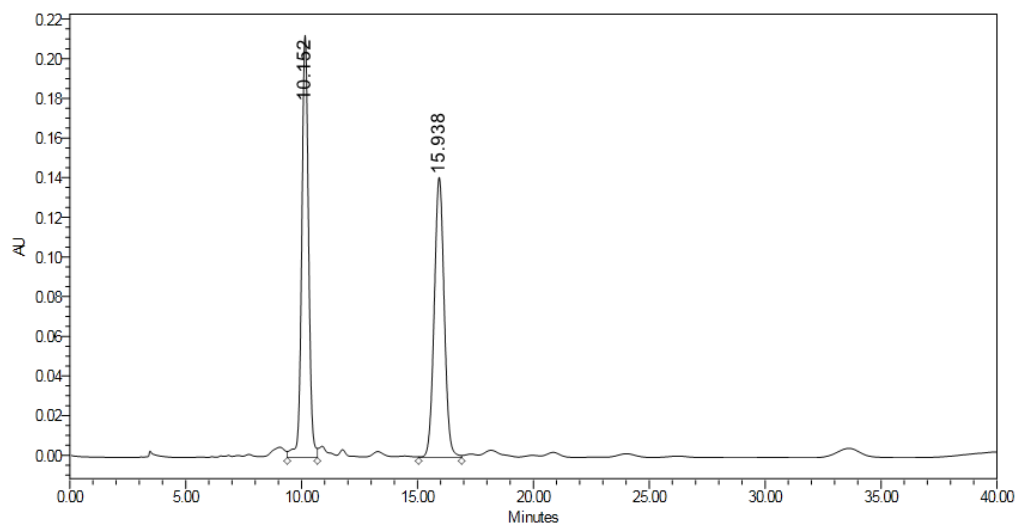

|   | RT<br>(min) | Area<br>( $\mu\text{V}\cdot\text{sec}$ ) | % Area |
|---|-------------|------------------------------------------|--------|
| 1 | 10.152      | 4345712                                  | 50.65  |
| 2 | 15.938      | 4234976                                  | 49.35  |

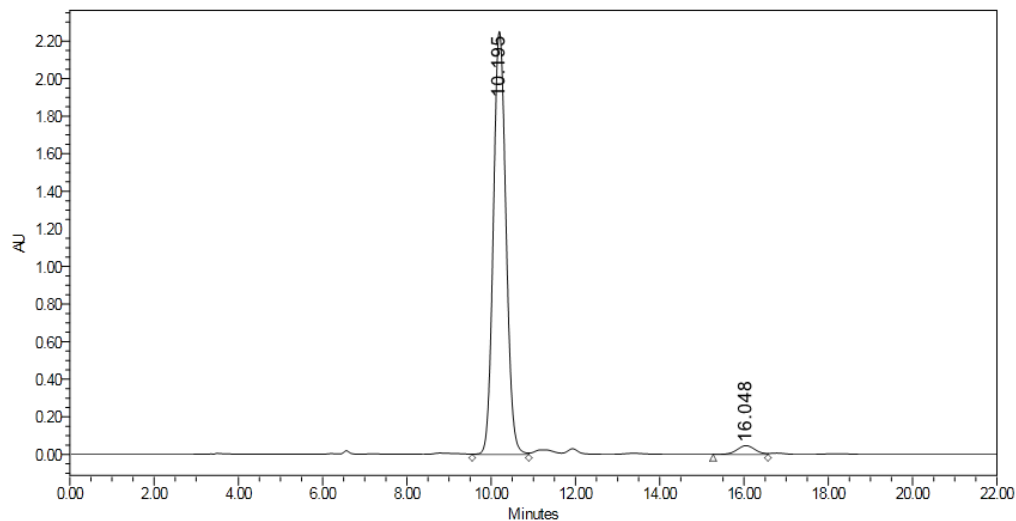

|   | RT<br>(min) | Area<br>( $\mu\text{V}\cdot\text{sec}$ ) | % Area |
|---|-------------|------------------------------------------|--------|
| 1 | 10.195      | 46959161                                 | 97.16  |
| 2 | 16.048      | 1372722                                  | 2.84   |

Compound **4ad**'s <sup>1</sup>H NMR Spectra

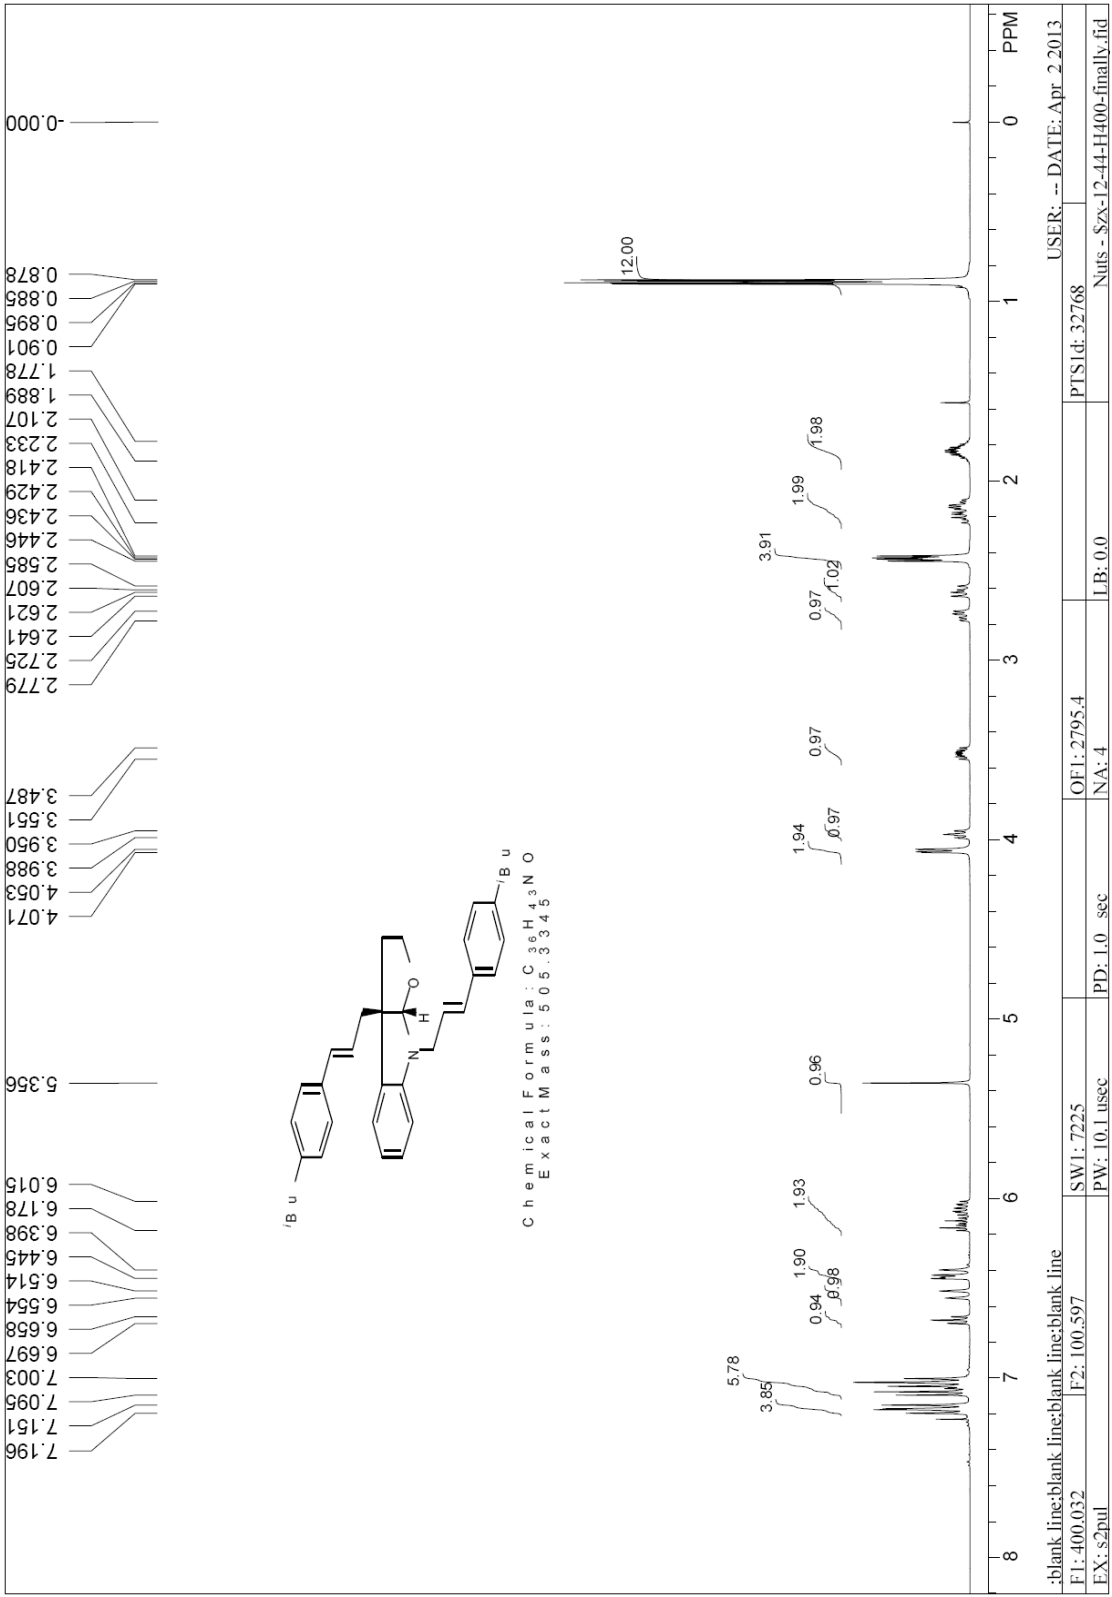

Compound **4ad**'s  $^{13}\text{C}$  NMR Spectra

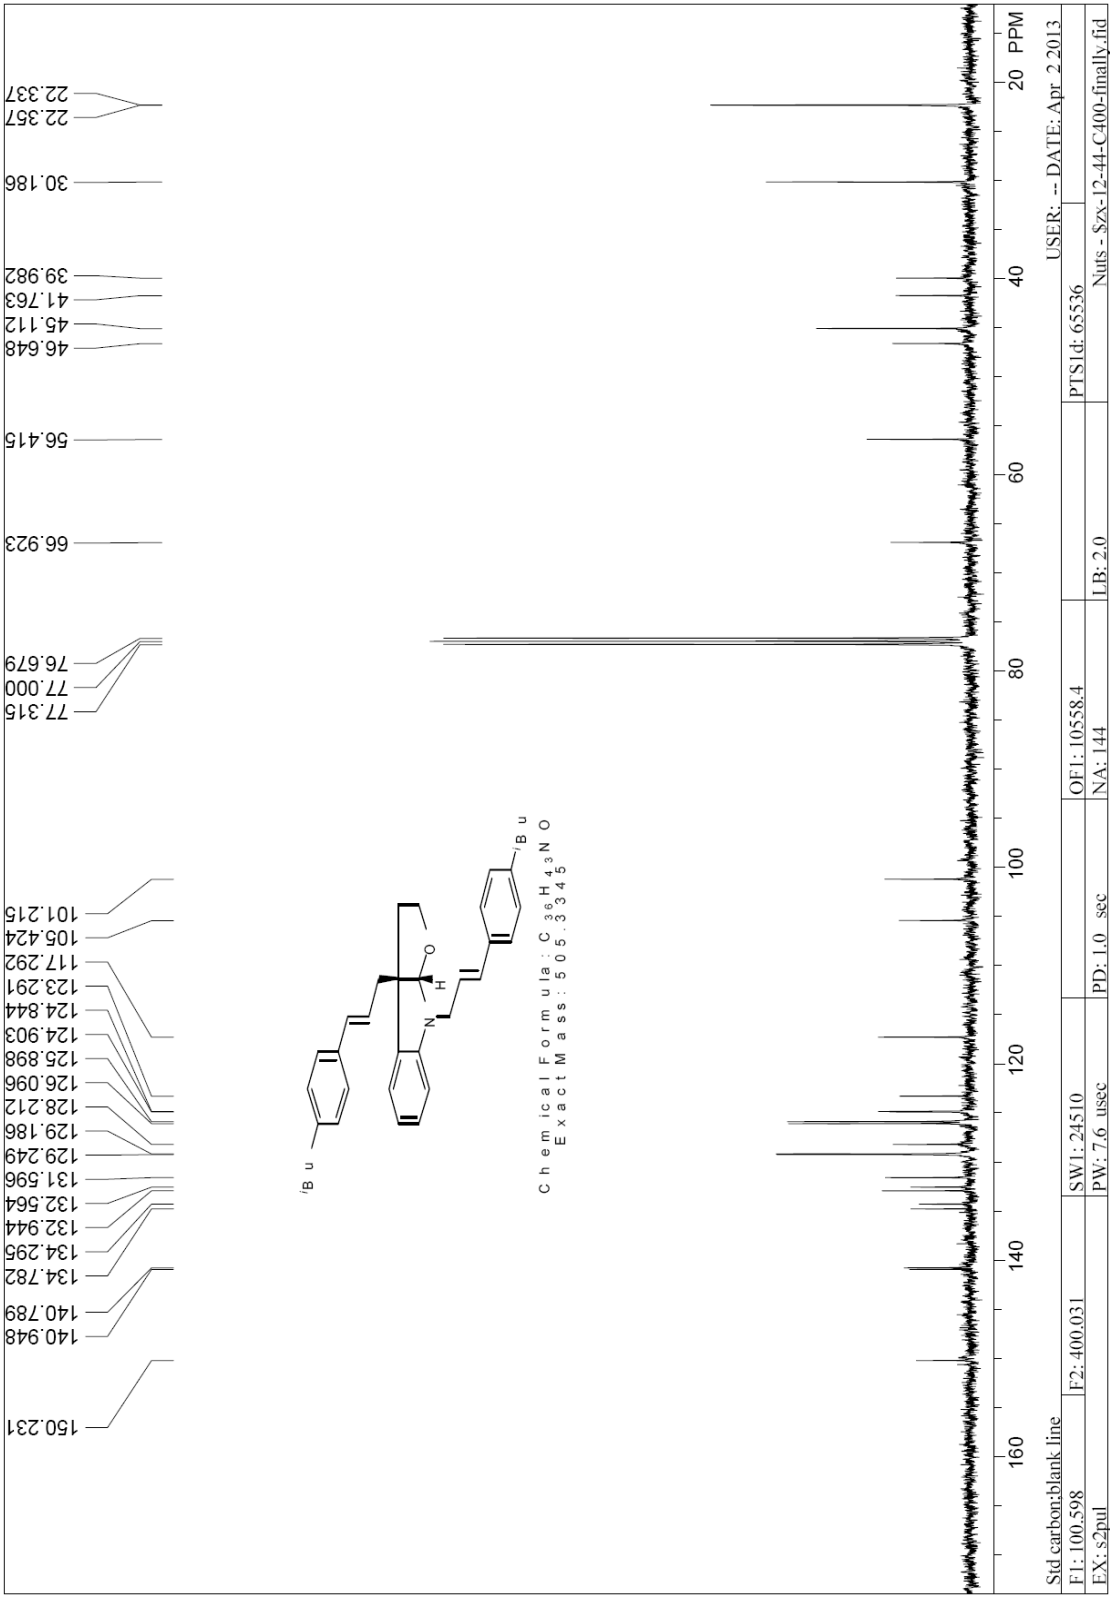



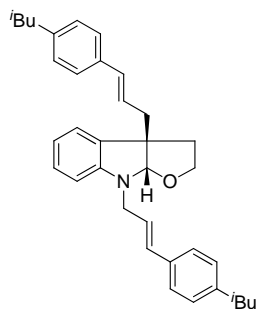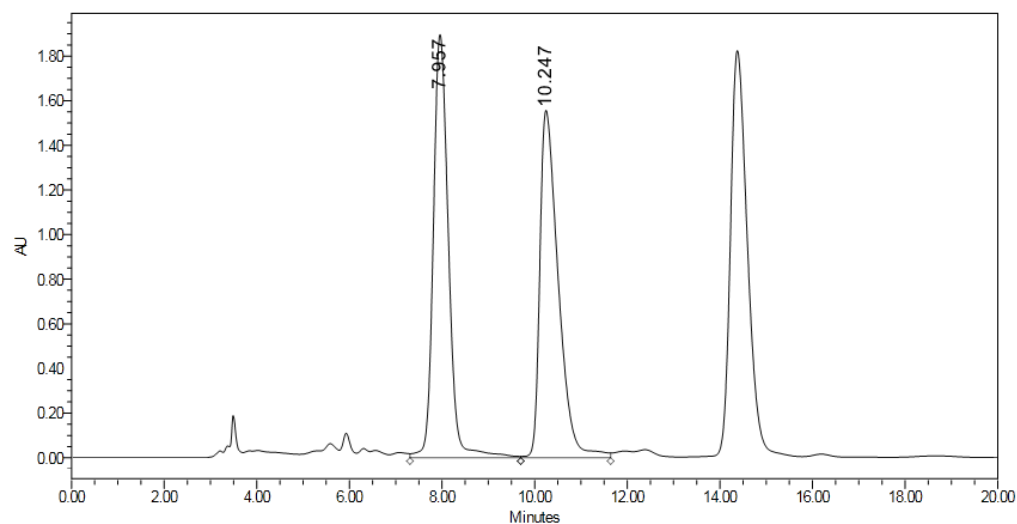

|   | RT<br>(min) | Area<br>( $\mu\text{V}\cdot\text{sec}$ ) | % Area |
|---|-------------|------------------------------------------|--------|
| 1 | 7.957       | 43107495                                 | 50.09  |
| 2 | 10.247      | 42949687                                 | 49.91  |

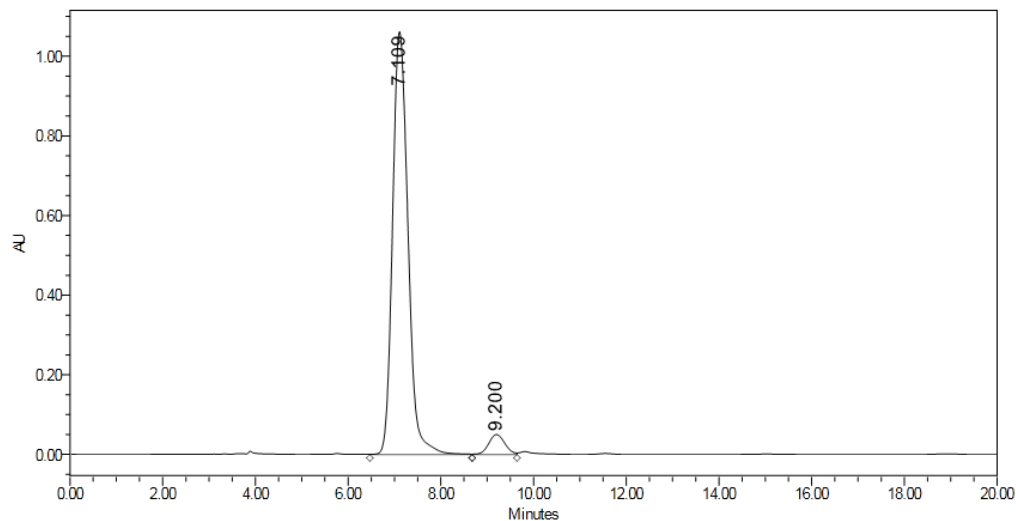

|   | RT<br>(min) | Area<br>( $\mu\text{V}\cdot\text{sec}$ ) | % Area |
|---|-------------|------------------------------------------|--------|
| 1 | 7.109       | 24547497                                 | 95.27  |
| 2 | 9.200       | 1217438                                  | 4.73   |

Compound **4ae**'s <sup>1</sup>H NMR Spectra

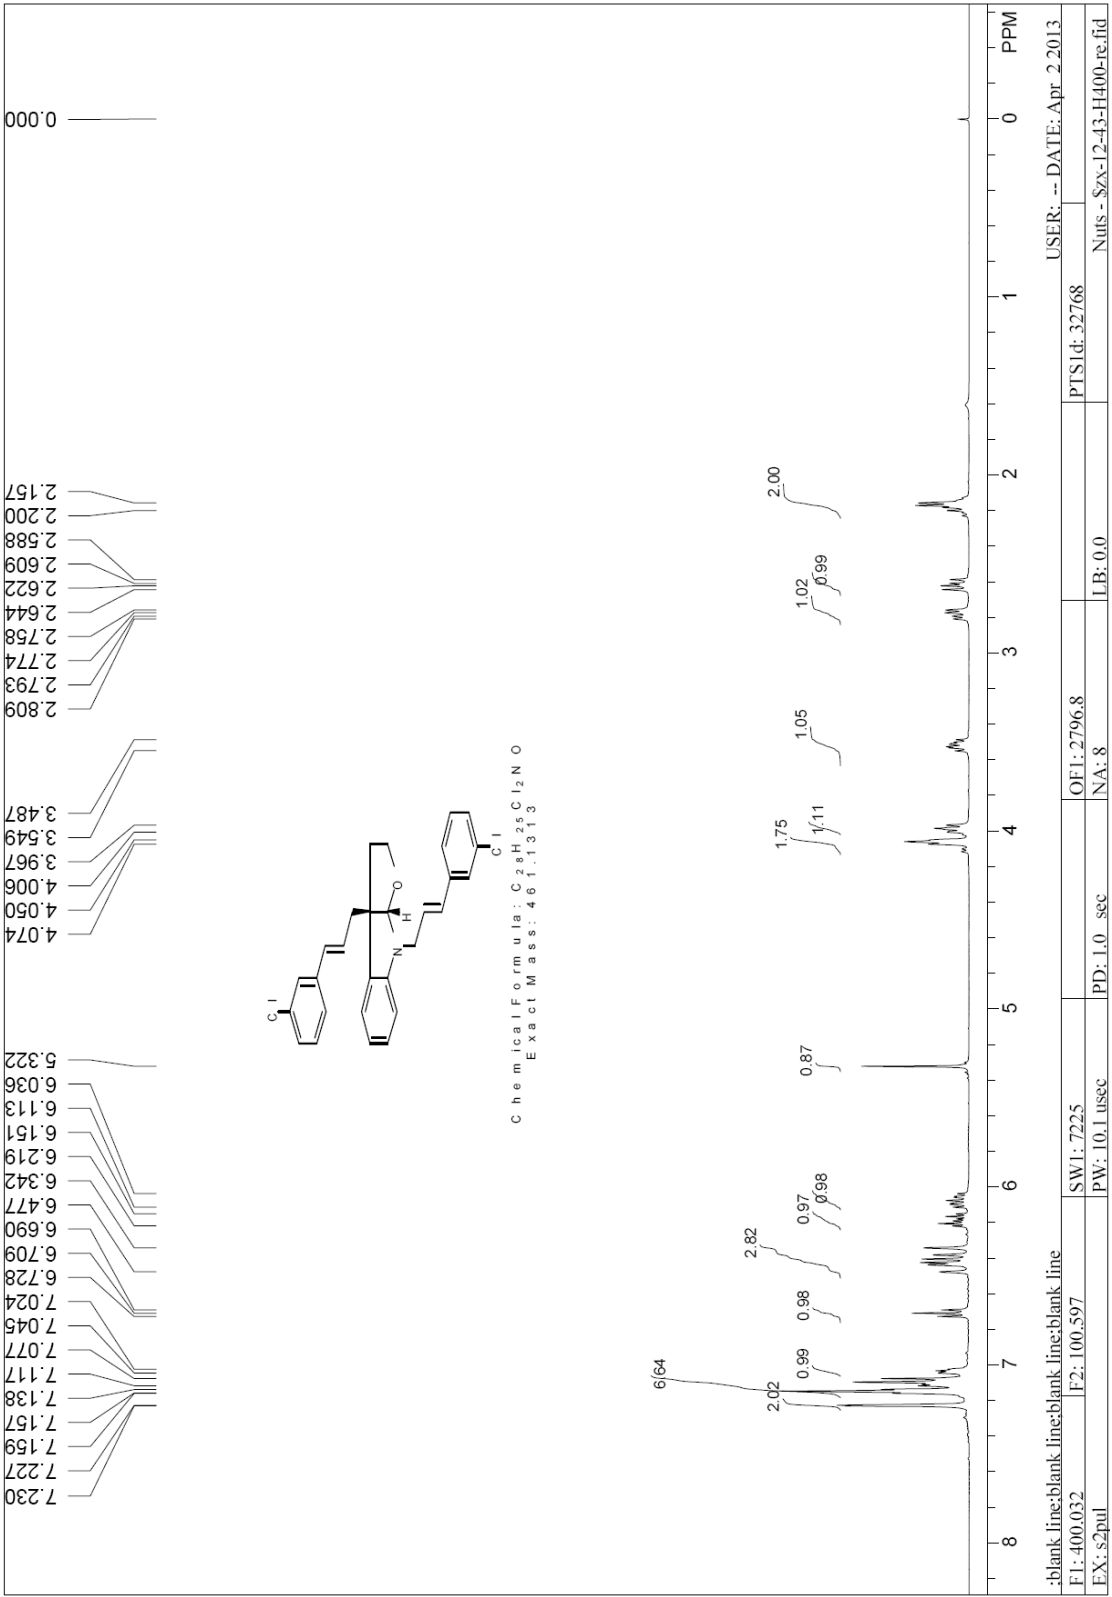

Compound **4ae**'s  $^{13}\text{C}$  NMR Spectra

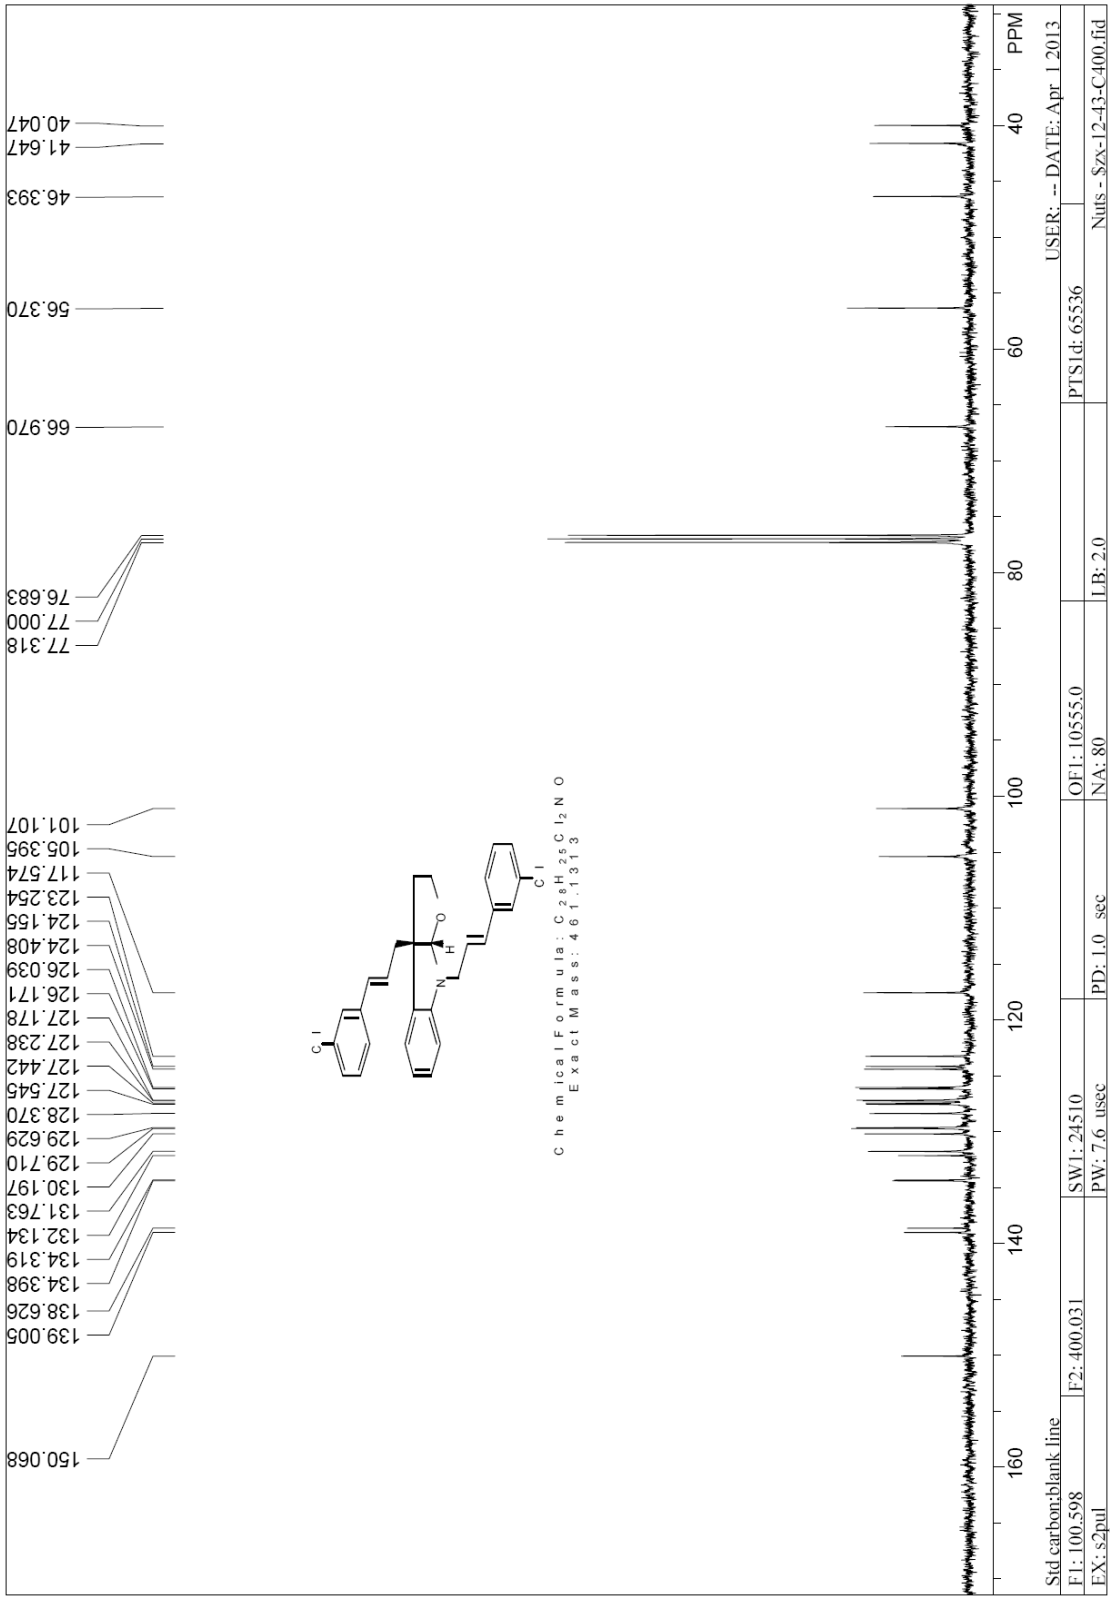

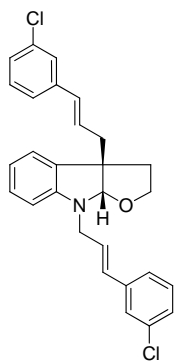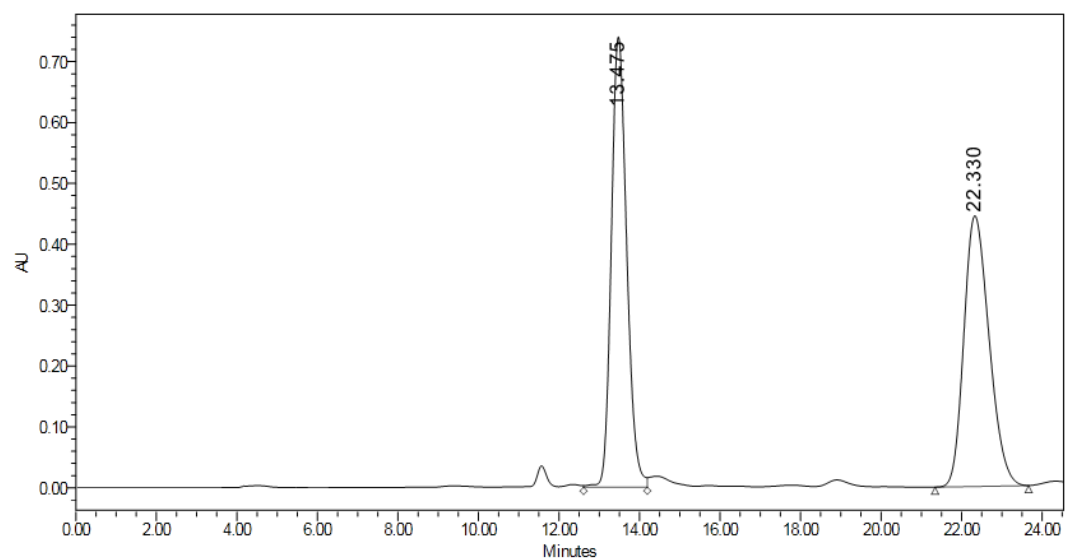

|   | RT<br>(min) | Area<br>( $\mu\text{V}\cdot\text{sec}$ ) | % Area |
|---|-------------|------------------------------------------|--------|
| 1 | 13.475      | 19651125                                 | 50.36  |
| 2 | 22.330      | 19371859                                 | 49.64  |

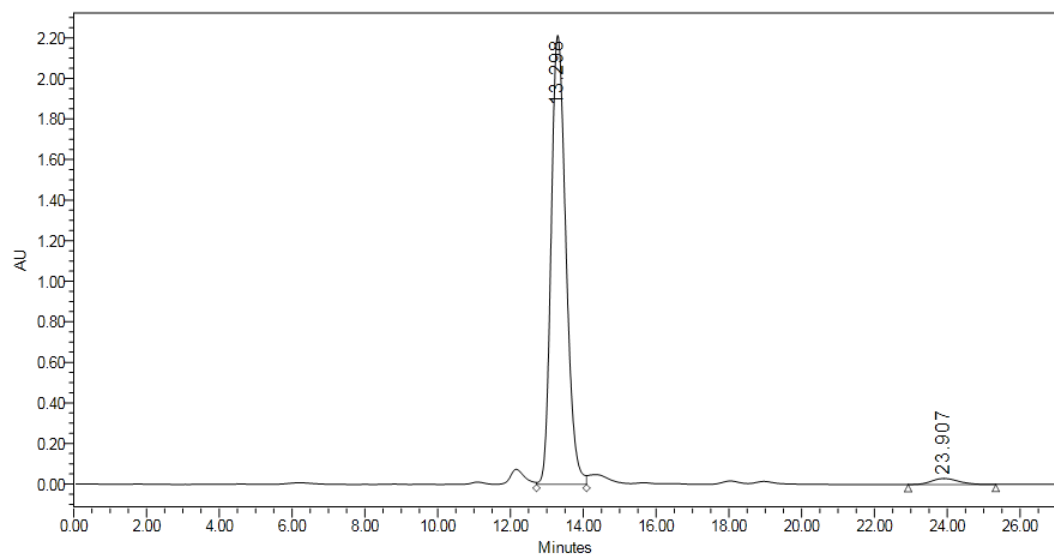

|   | RT<br>(min) | Area<br>( $\mu\text{V}\cdot\text{sec}$ ) | % Area |
|---|-------------|------------------------------------------|--------|
| 1 | 13.298      | 62400850                                 | 97.67  |
| 2 | 23.907      | 1488451                                  | 2.33   |



Compound **4af**'s  $^{13}\text{C}$  NMR Spectra

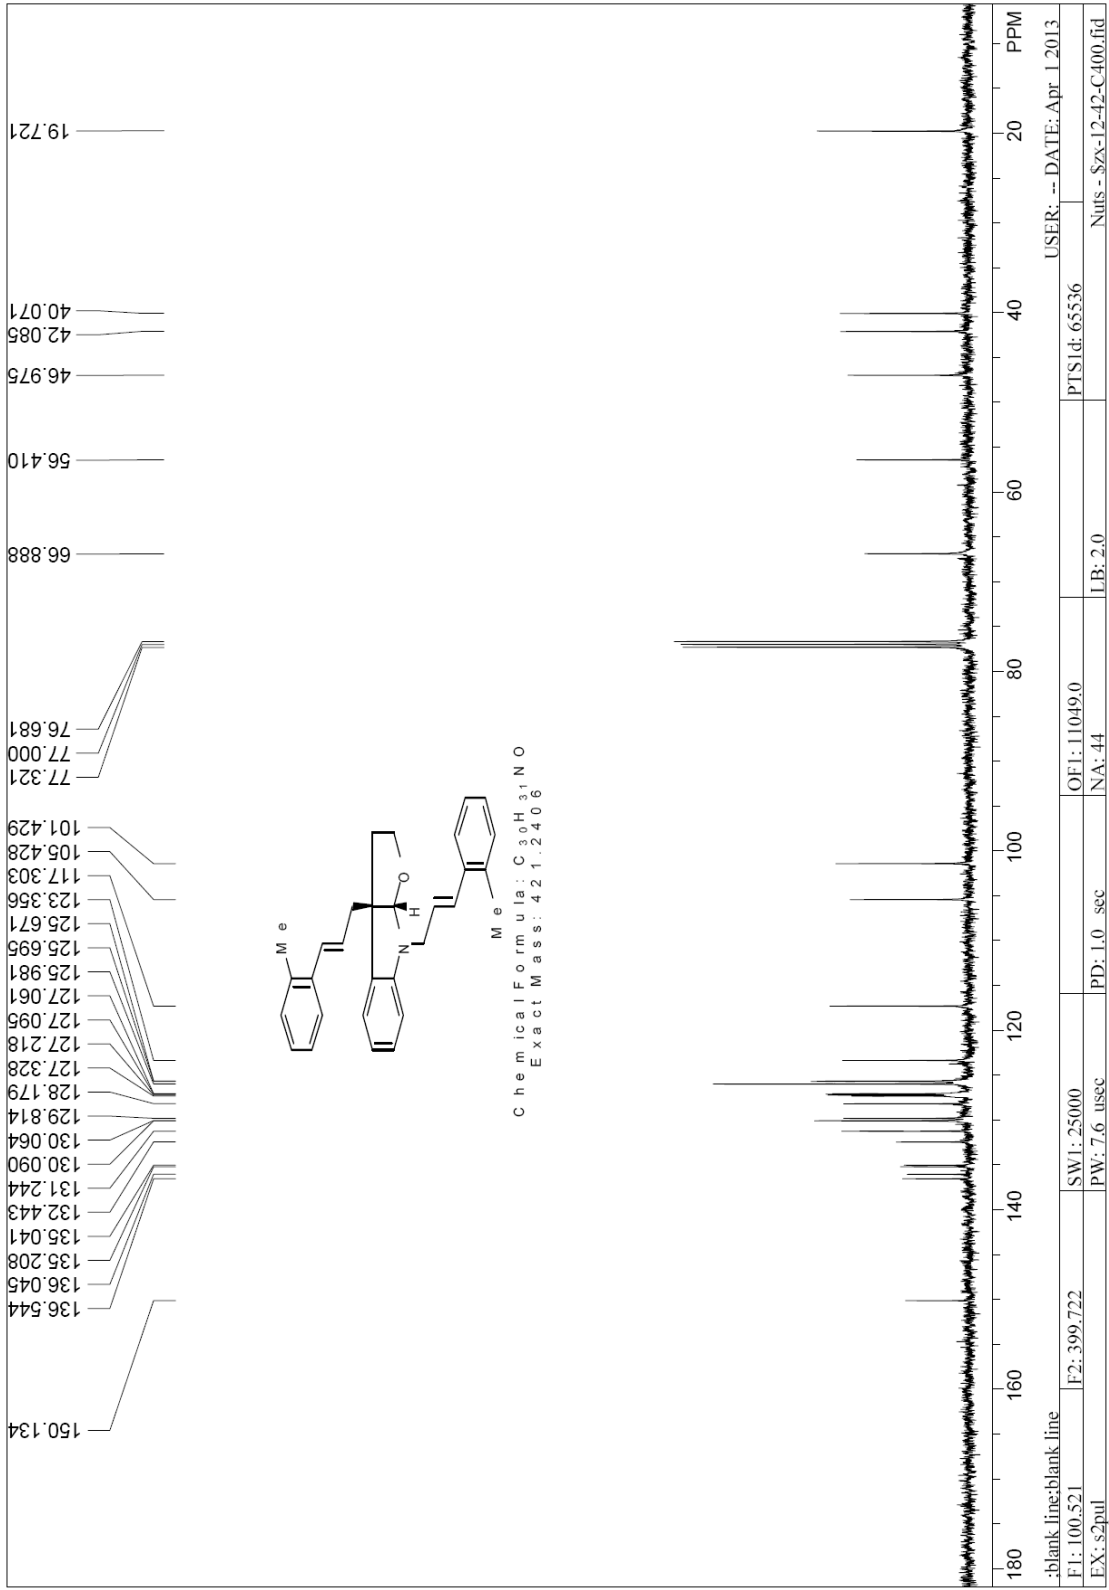

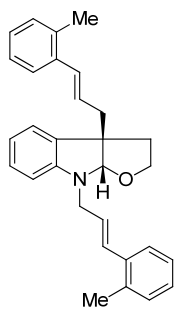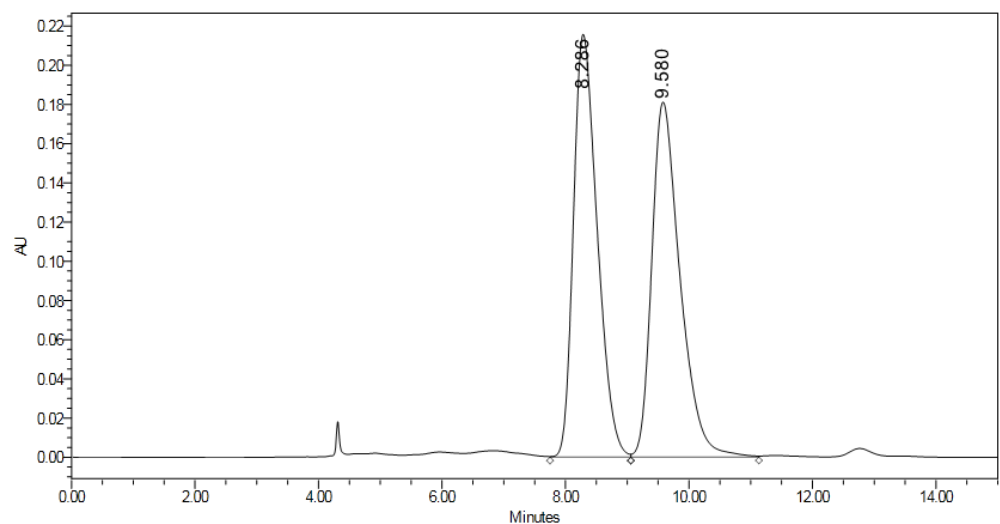

|   | RT<br>(min) | Area<br>( $\mu\text{V}\cdot\text{sec}$ ) | % Area |
|---|-------------|------------------------------------------|--------|
| 1 | 8.286       | 5766018                                  | 50.04  |
| 2 | 9.580       | 5756505                                  | 49.96  |

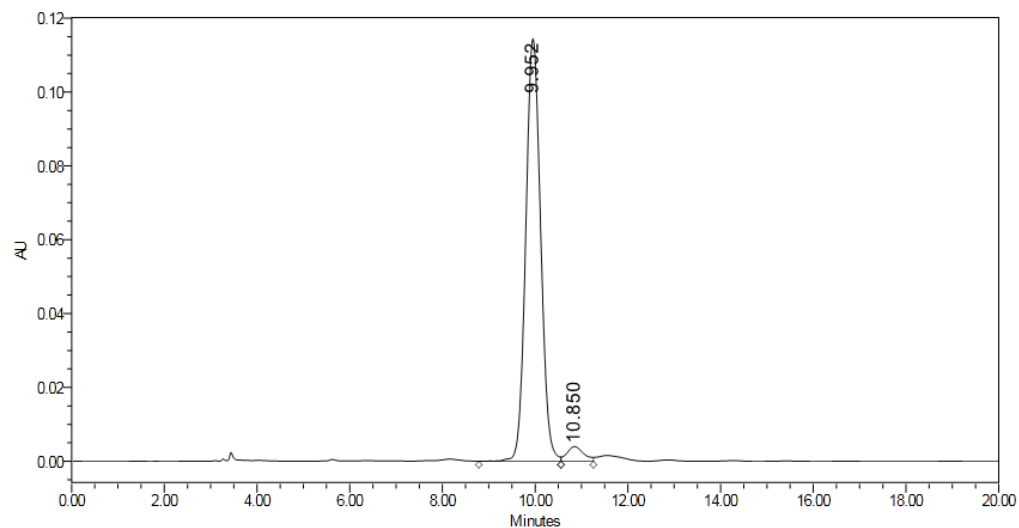

|   | RT<br>(min) | Area<br>( $\mu\text{V}\cdot\text{sec}$ ) | % Area |
|---|-------------|------------------------------------------|--------|
| 1 | 9.952       | 2543446                                  | 96.23  |
| 2 | 10.850      | 99716                                    | 3.77   |

Compound **4ag**'s <sup>1</sup>H NMR Spectra

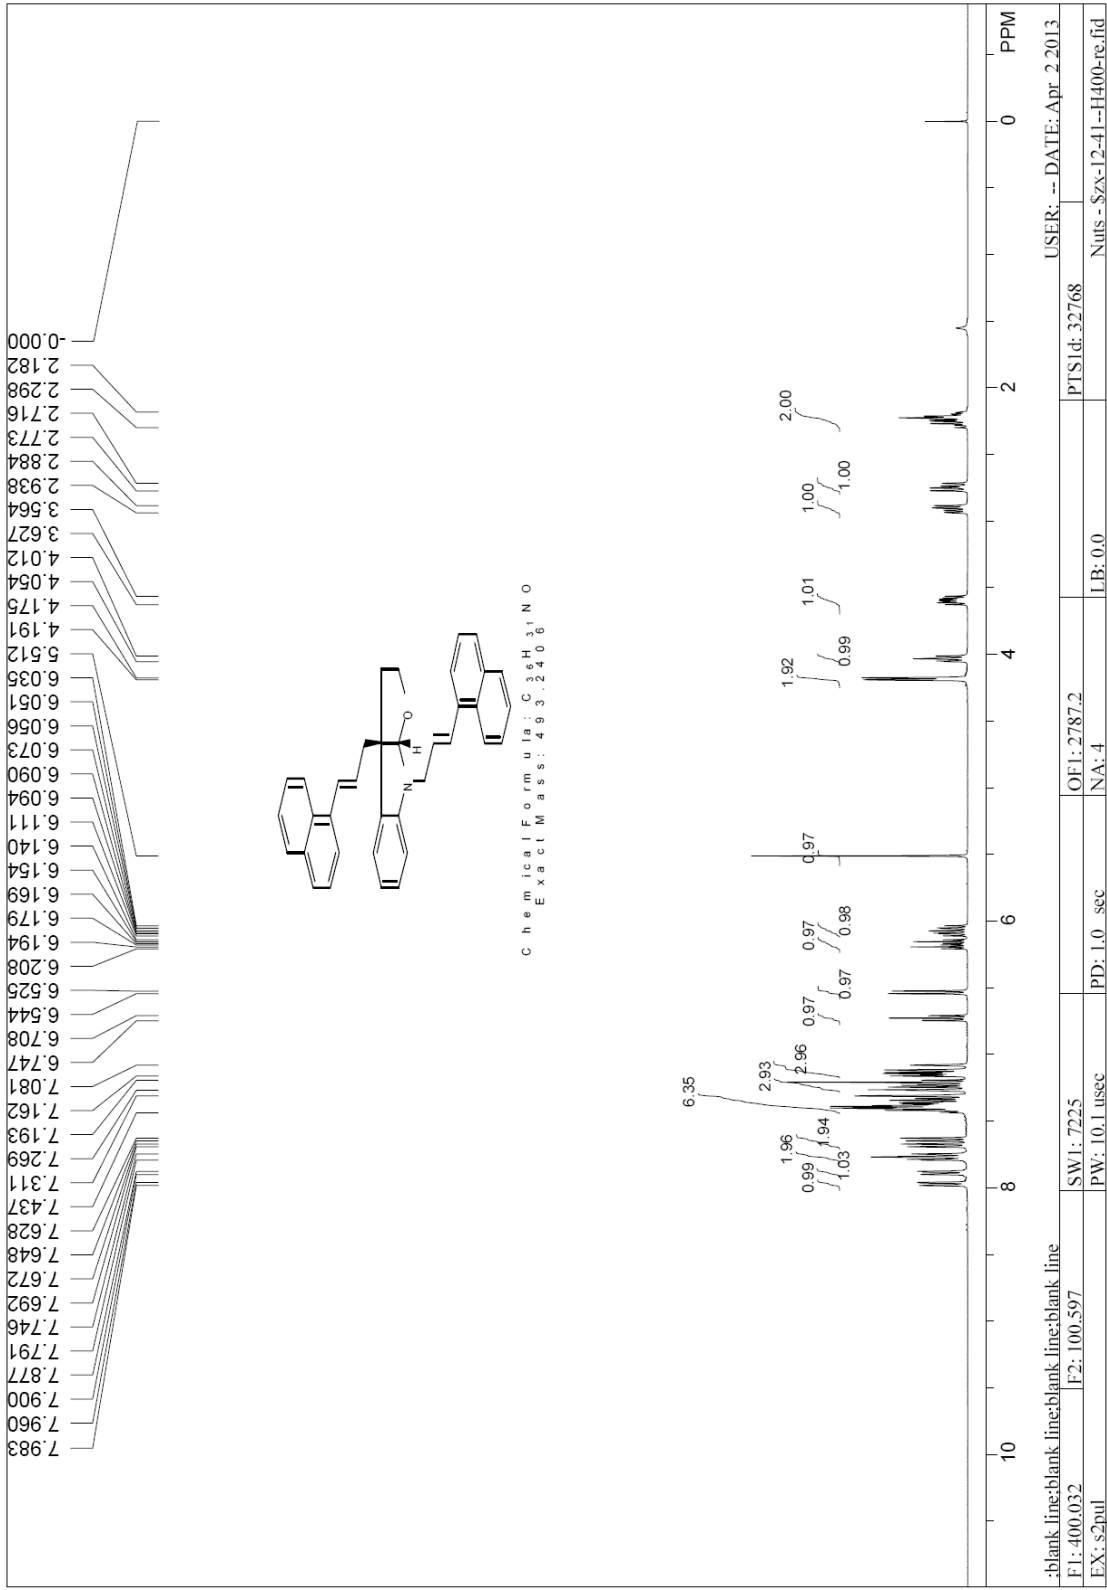



Compound **4ag**'s  $^{13}\text{C}$  NMR Spectra

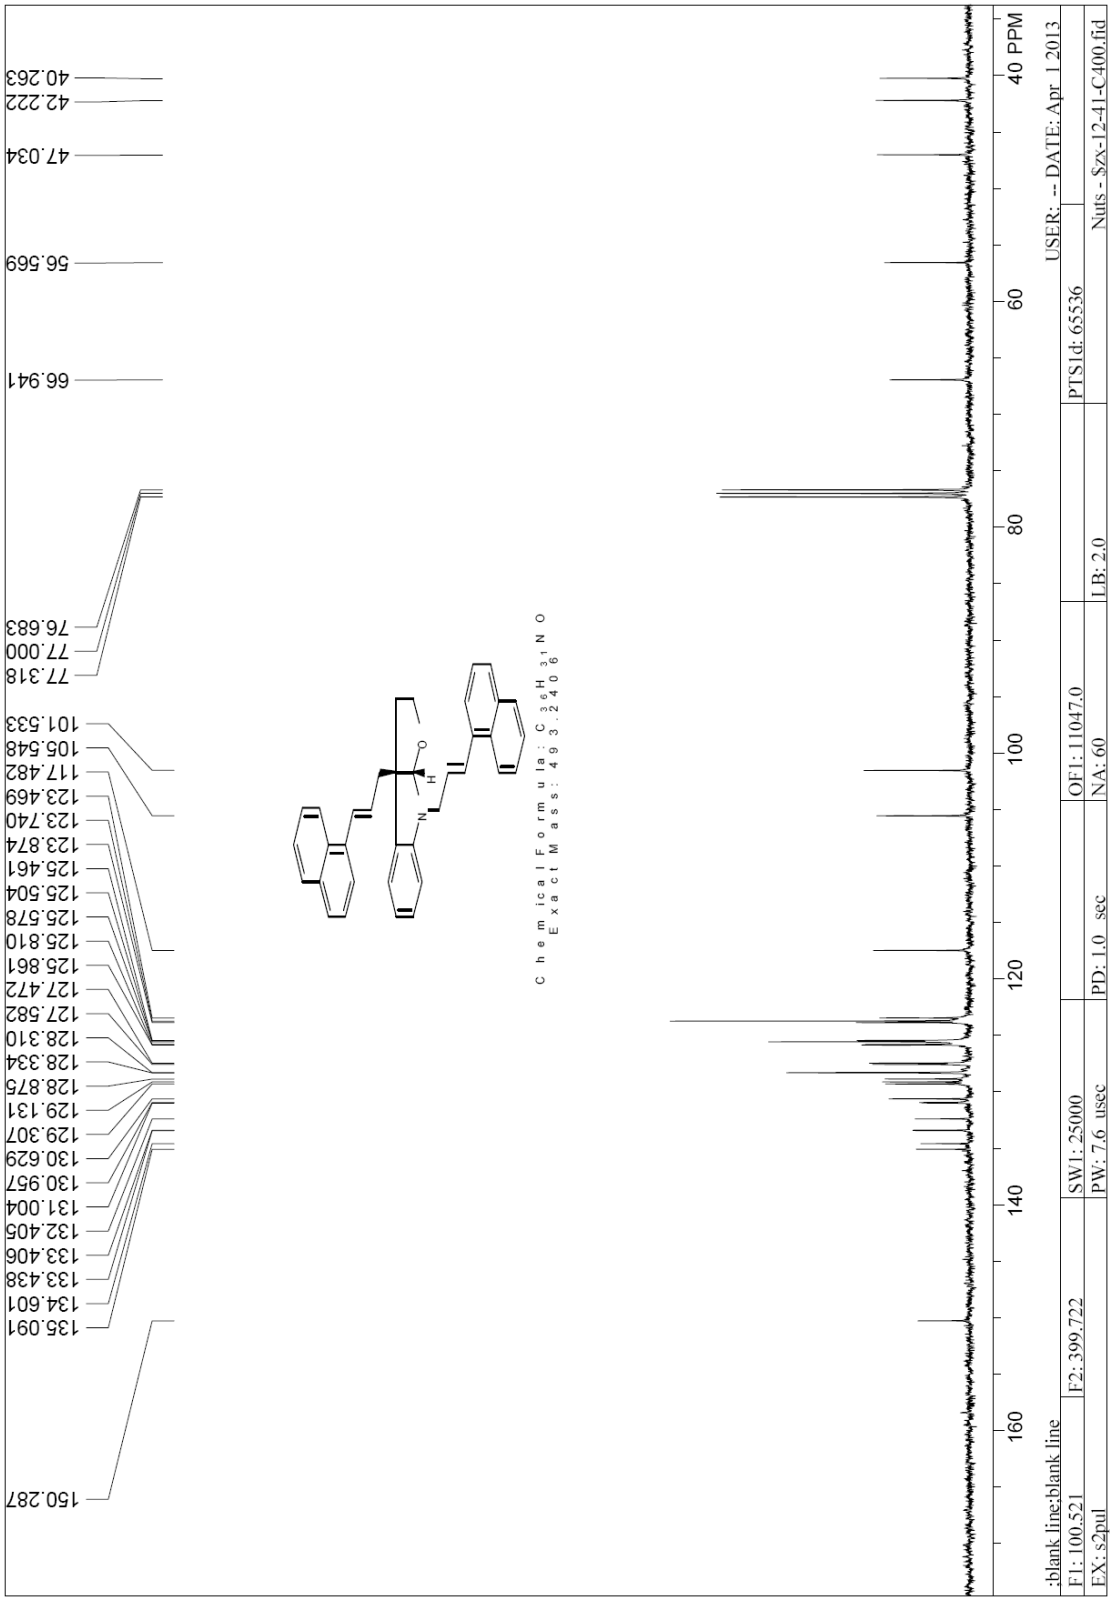

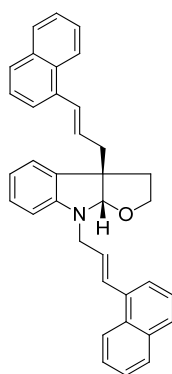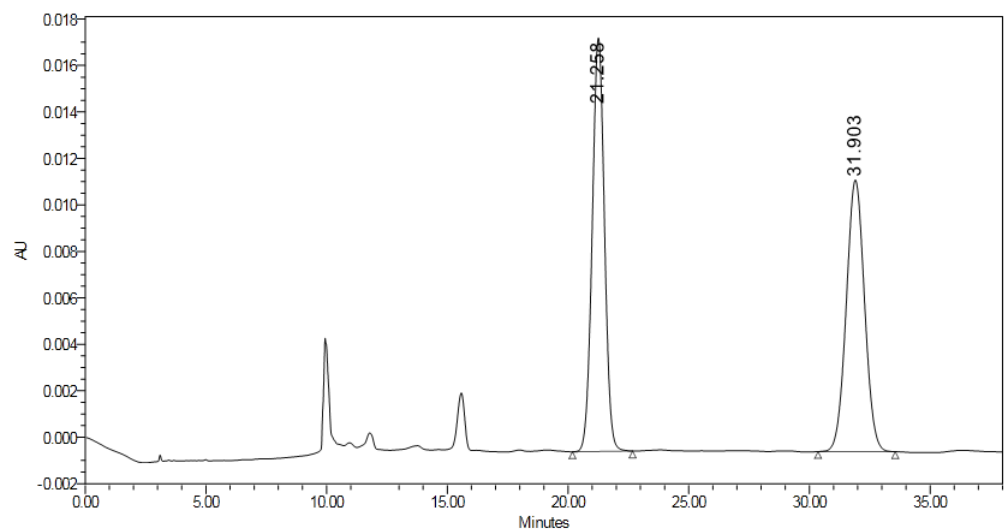

|   | RT<br>(min) | Area<br>( $\mu\text{V}\cdot\text{sec}$ ) | % Area |
|---|-------------|------------------------------------------|--------|
| 1 | 21.258      | 626673                                   | 50.45  |
| 2 | 31.903      | 615500                                   | 49.55  |

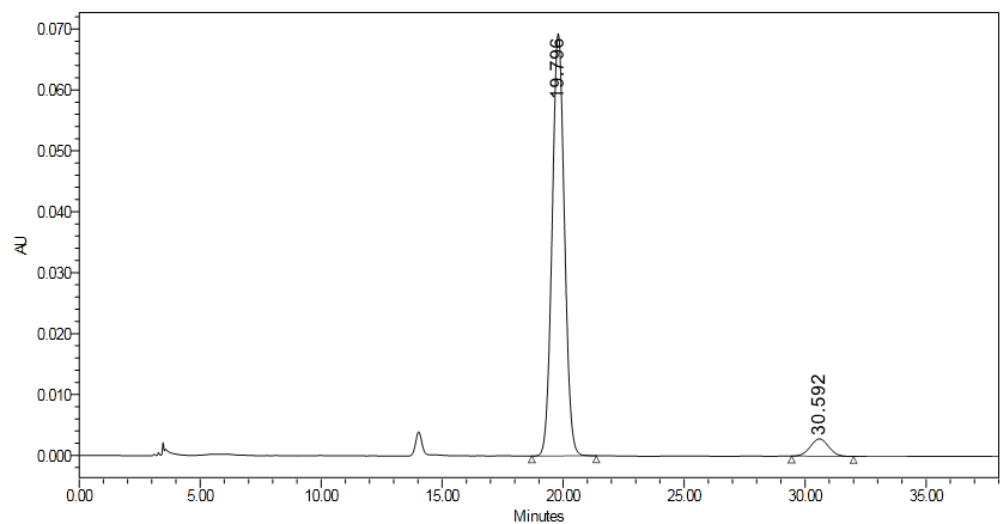

|   | RT<br>(min) | Area<br>( $\mu\text{V}\cdot\text{sec}$ ) | % Area |
|---|-------------|------------------------------------------|--------|
| 1 | 19.796      | 2454157                                  | 94.24  |
| 2 | 30.592      | 149891                                   | 5.76   |

Compound **4ah**'s <sup>1</sup>H NMR Spectra

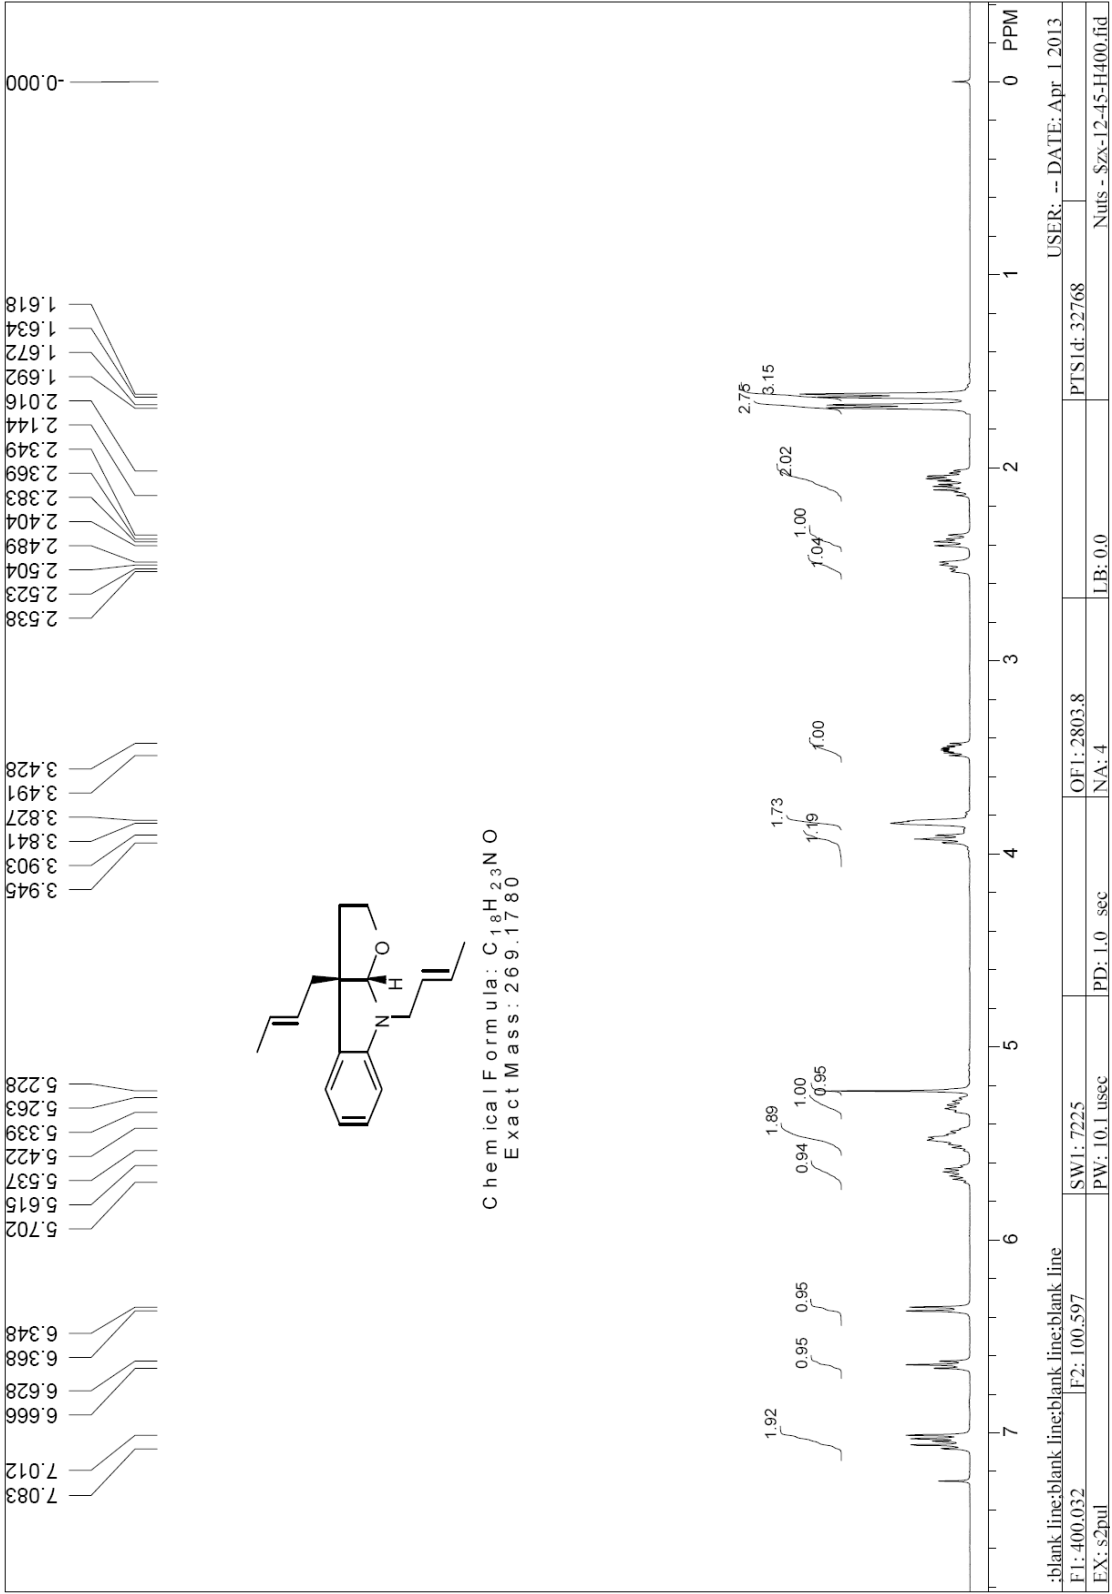

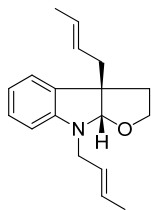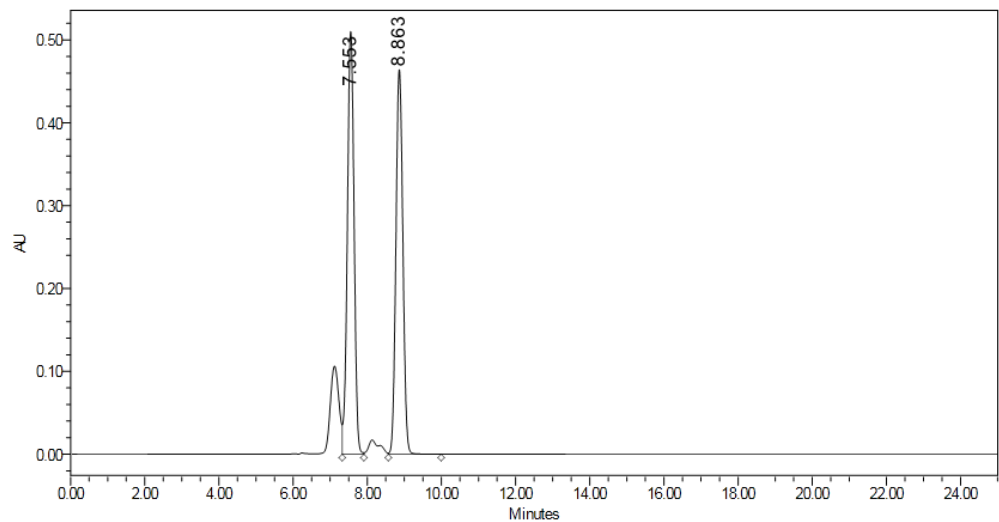

|   | RT<br>(min) | Area<br>( $\mu\text{V}\cdot\text{sec}$ ) | % Area |
|---|-------------|------------------------------------------|--------|
| 1 | 7.553       | 6404908                                  | 51.49  |
| 2 | 8.863       | 6034737                                  | 48.51  |

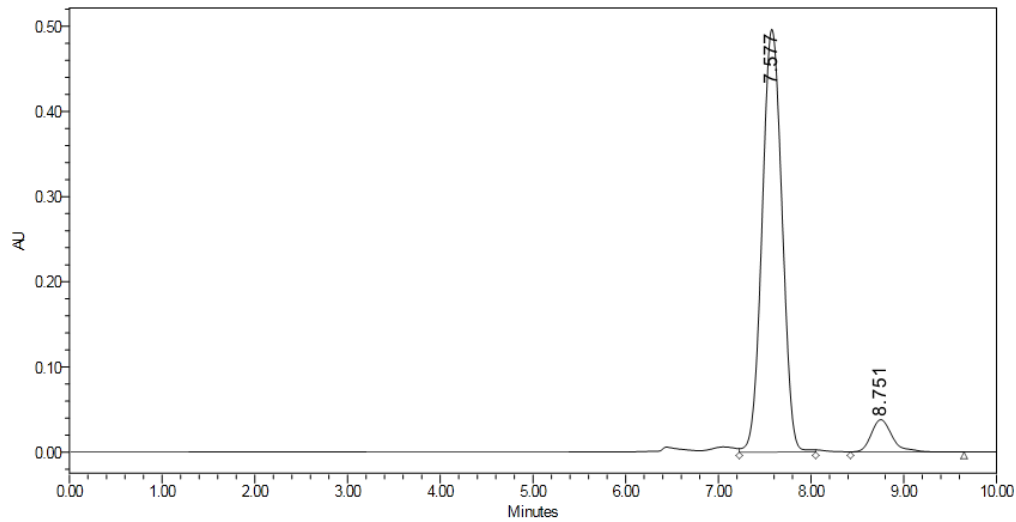

|   | RT<br>(min) | Area<br>( $\mu\text{V}\cdot\text{sec}$ ) | % Area |
|---|-------------|------------------------------------------|--------|
| 1 | 7.577       | 7400943                                  | 92.58  |
| 2 | 8.751       | 592818                                   | 7.42   |

Compound **4ba**'s <sup>1</sup>H NMR Spectra

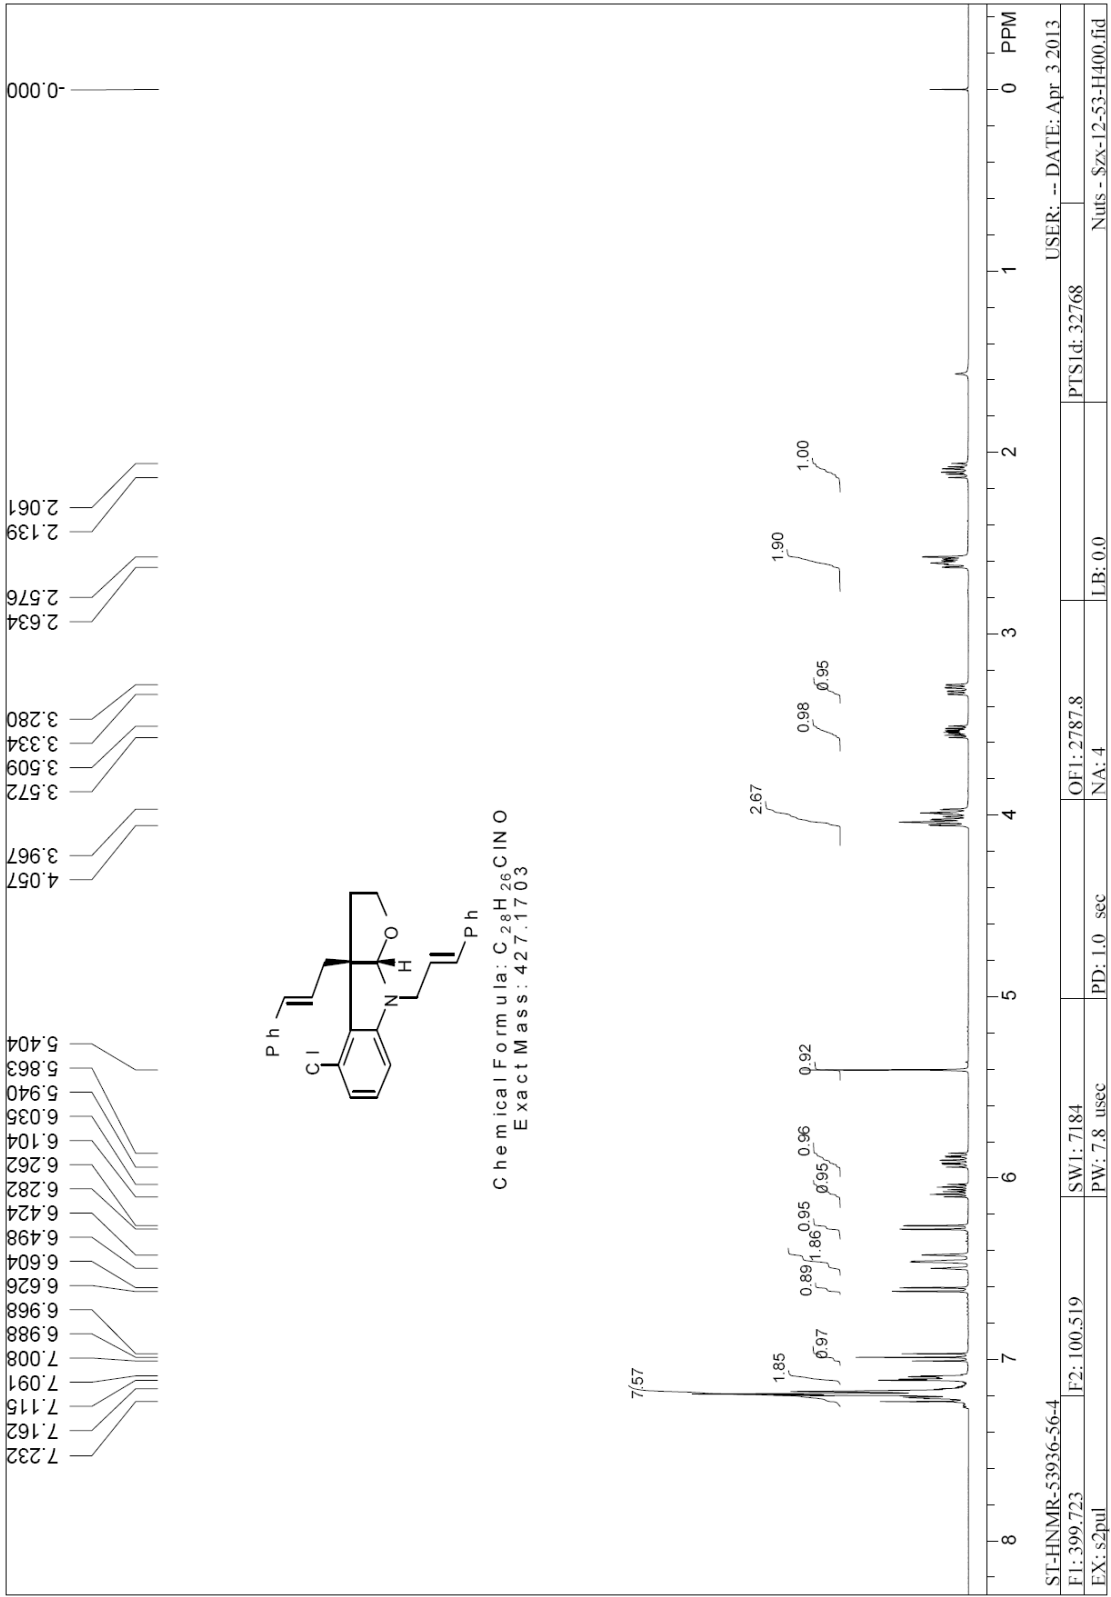

Compound **4ba**'s <sup>13</sup>C NMR Spectra

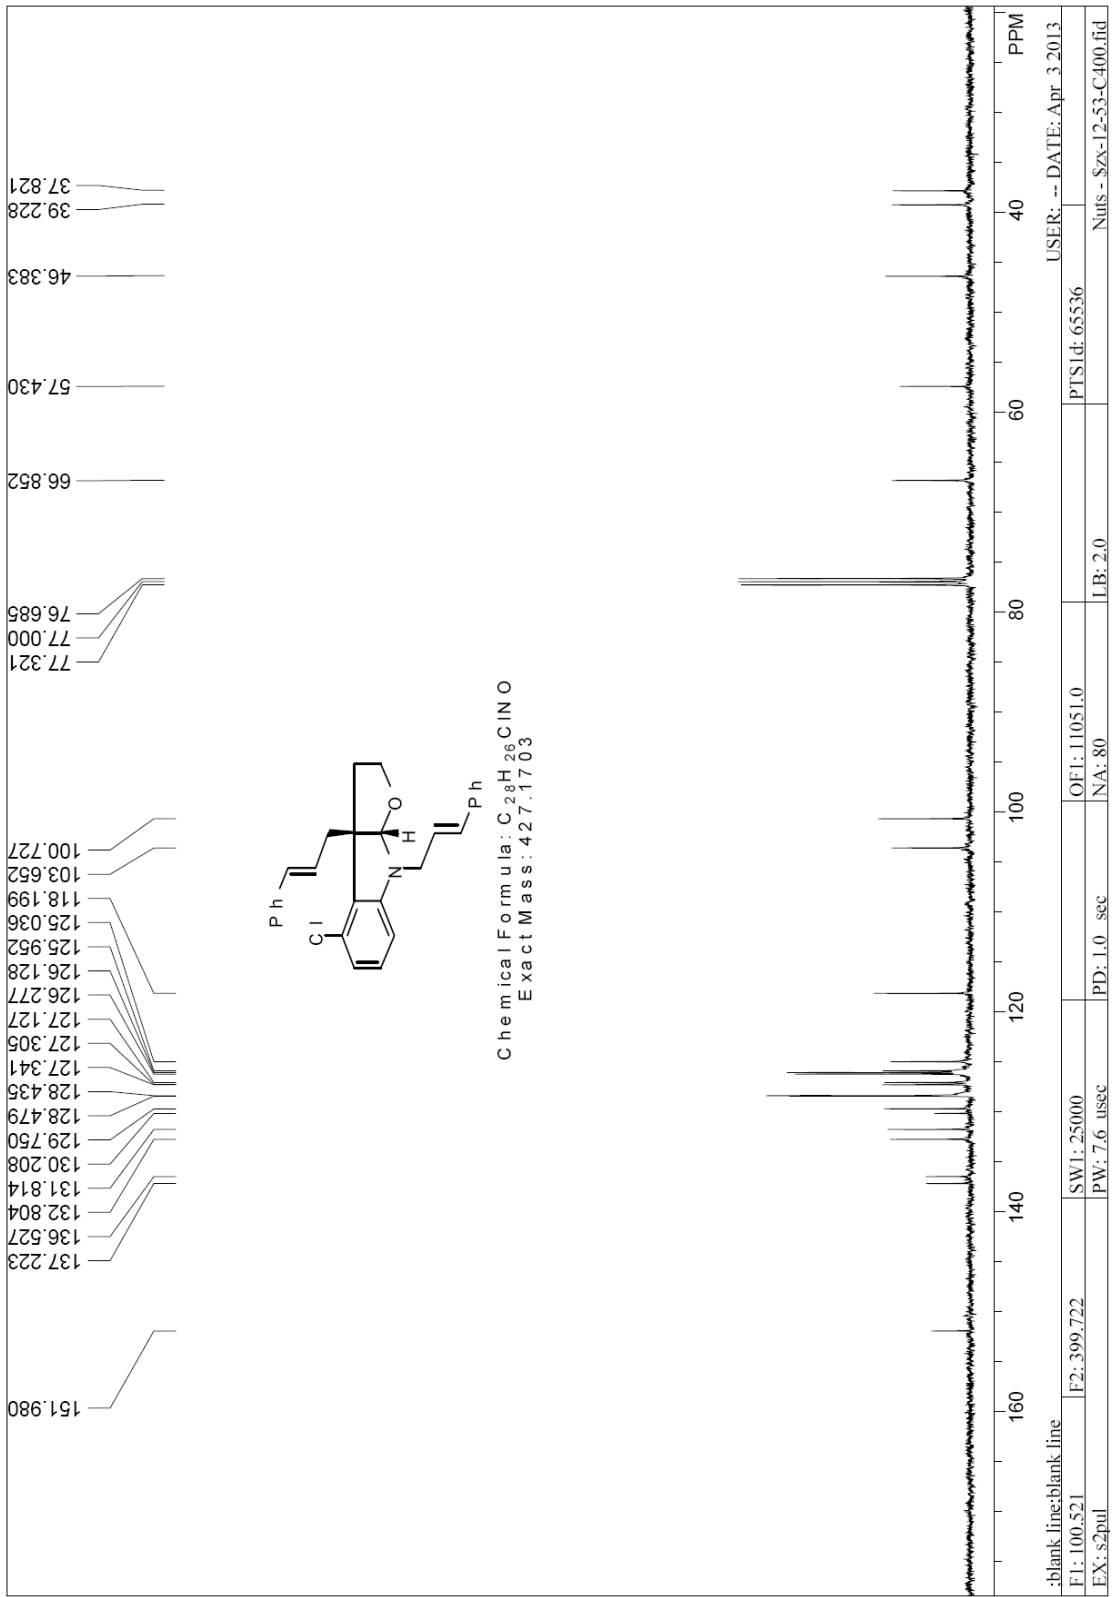

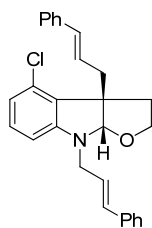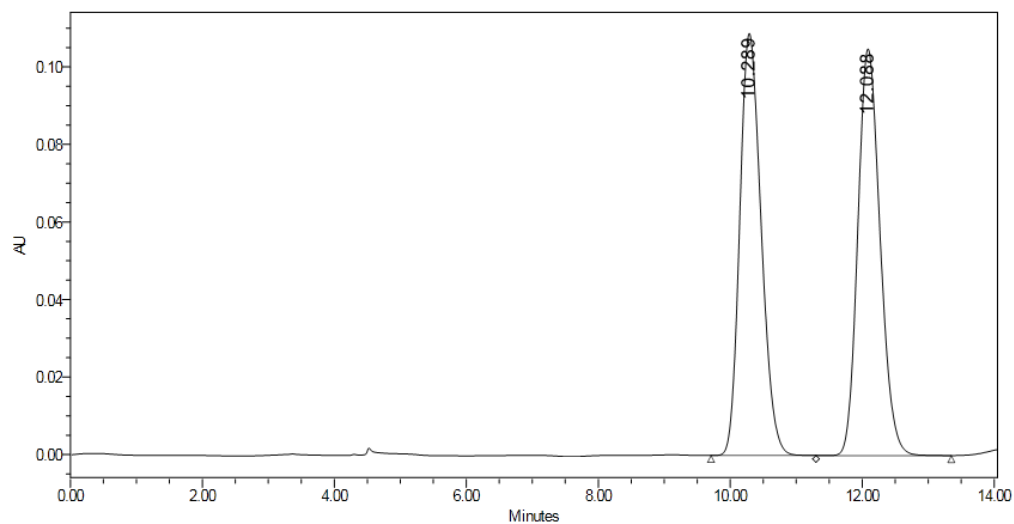

|   | RT<br>(min) | Area<br>( $\mu\text{V}\cdot\text{sec}$ ) | % Area |
|---|-------------|------------------------------------------|--------|
| 1 | 10.289      | 2452908                                  | 49.90  |
| 2 | 12.088      | 2462418                                  | 50.10  |

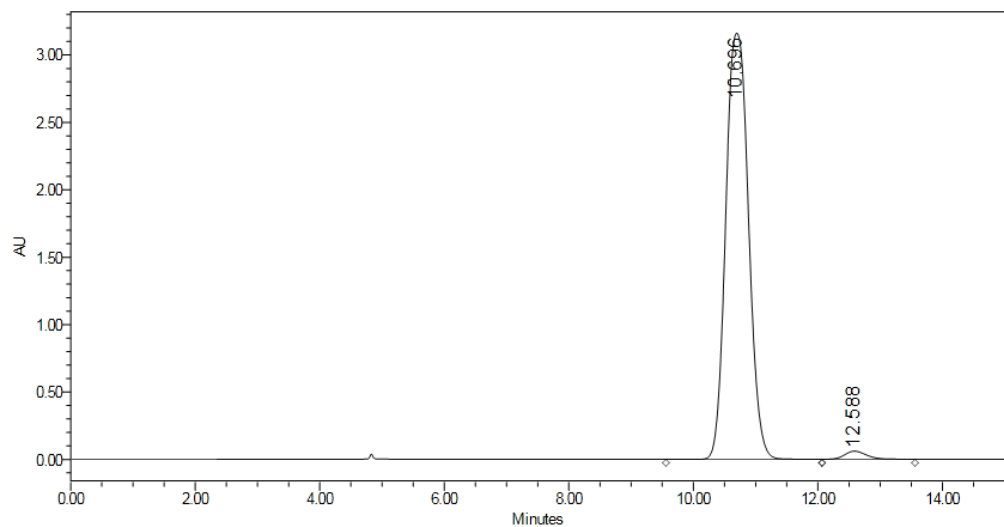

|   | RT<br>(min) | Area<br>( $\mu\text{V}\cdot\text{sec}$ ) | % Area |
|---|-------------|------------------------------------------|--------|
| 1 | 10.696      | 79959773                                 | 98.17  |
| 2 | 12.588      | 1494184                                  | 1.83   |

Compound **4ca**'s <sup>1</sup>H NMR Spectra

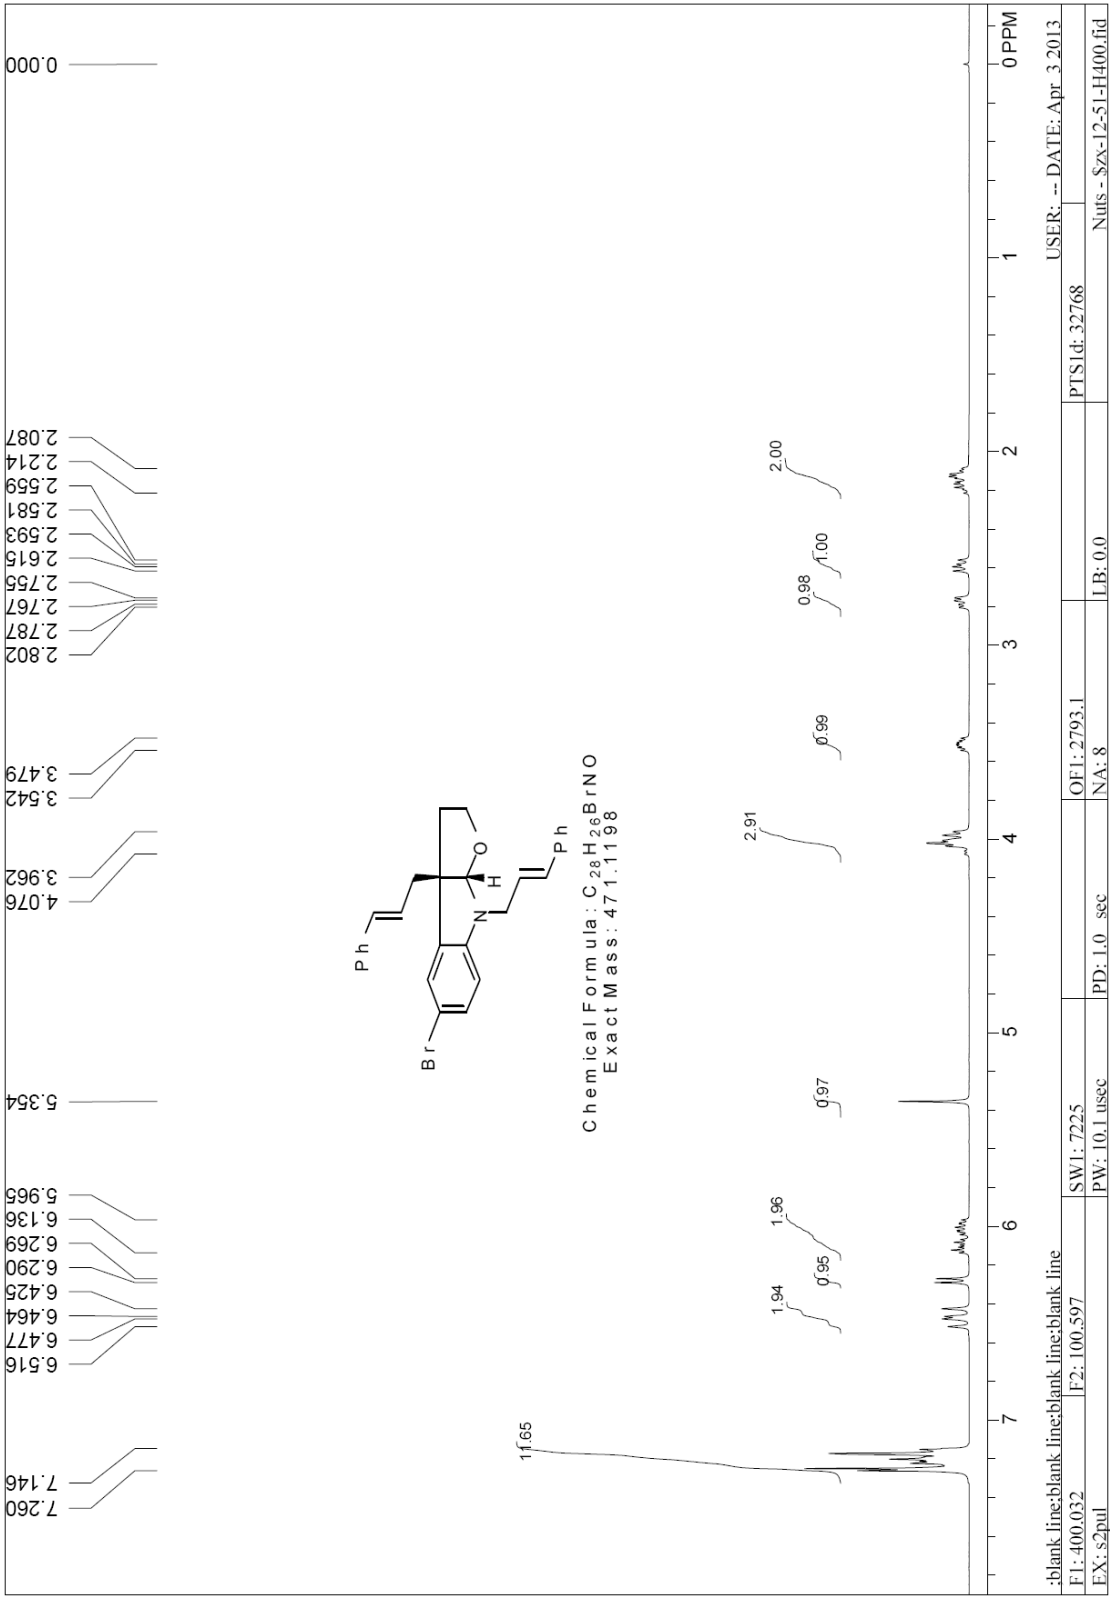



Compound **4ca**'s  $^{13}\text{C}$  NMR Spectra

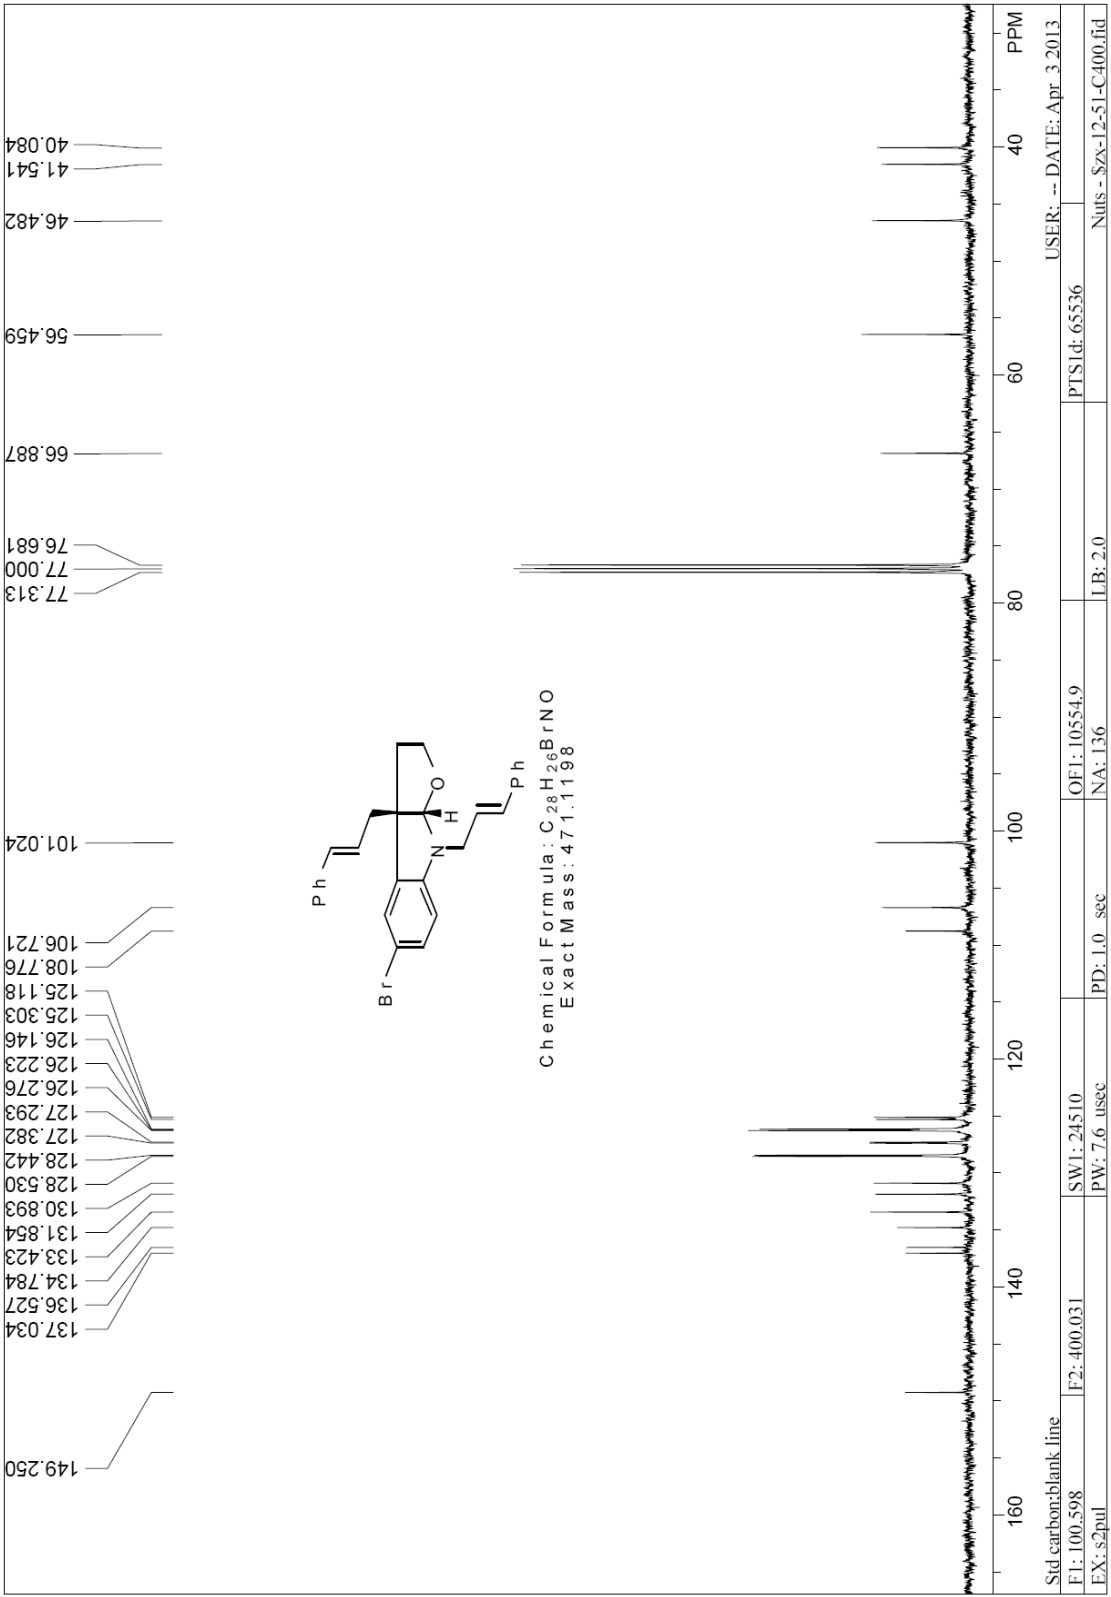

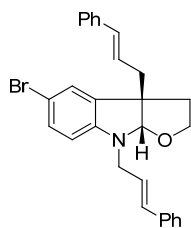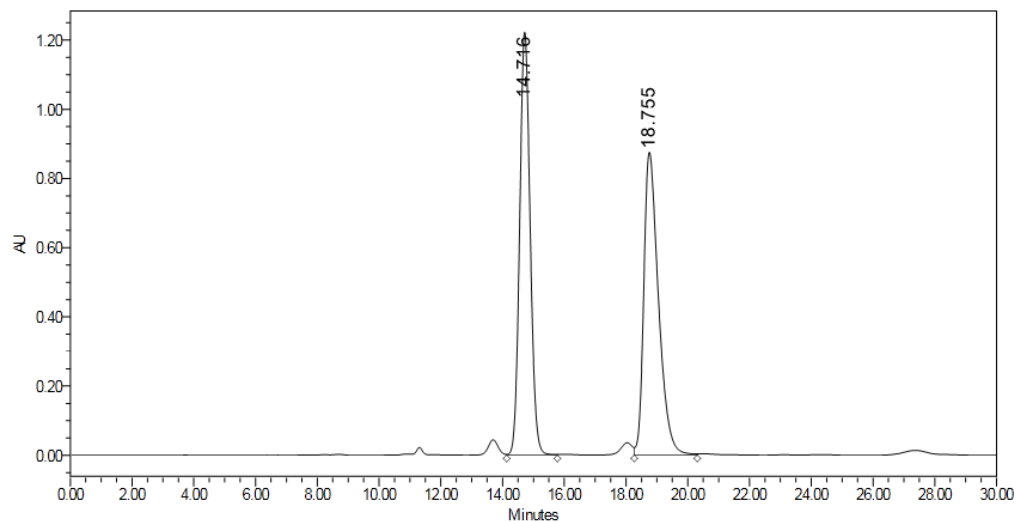

|   | RT<br>(min) | Area<br>( $\mu\text{V}\cdot\text{sec}$ ) | % Area |
|---|-------------|------------------------------------------|--------|
| 1 | 14.716      | 28861592                                 | 50.05  |
| 2 | 18.755      | 28809458                                 | 49.95  |

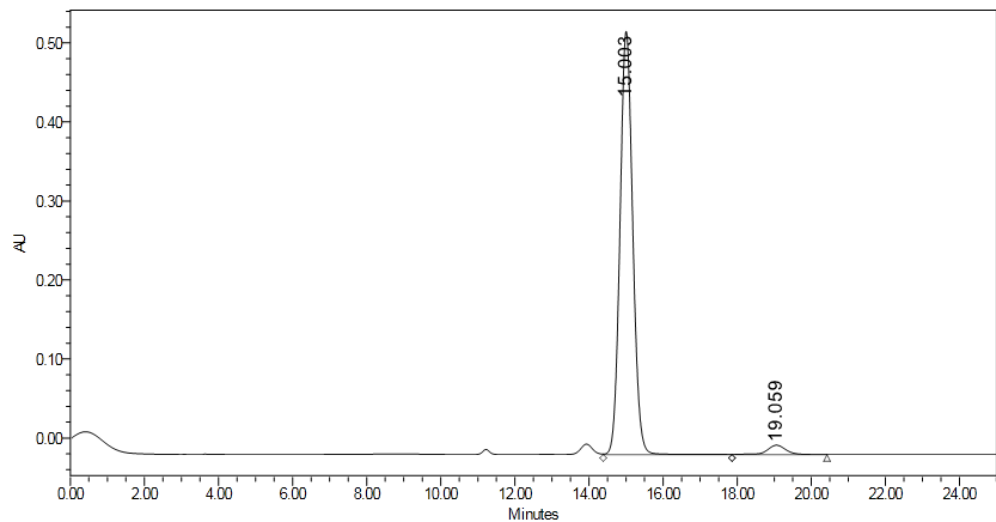

|   | RT<br>(min) | Area<br>( $\mu\text{V}\cdot\text{sec}$ ) | % Area |
|---|-------------|------------------------------------------|--------|
| 1 | 15.003      | 12787952                                 | 96.88  |
| 2 | 19.059      | 411504                                   | 3.12   |

Compound **4da**'s <sup>1</sup>H NMR Spectra

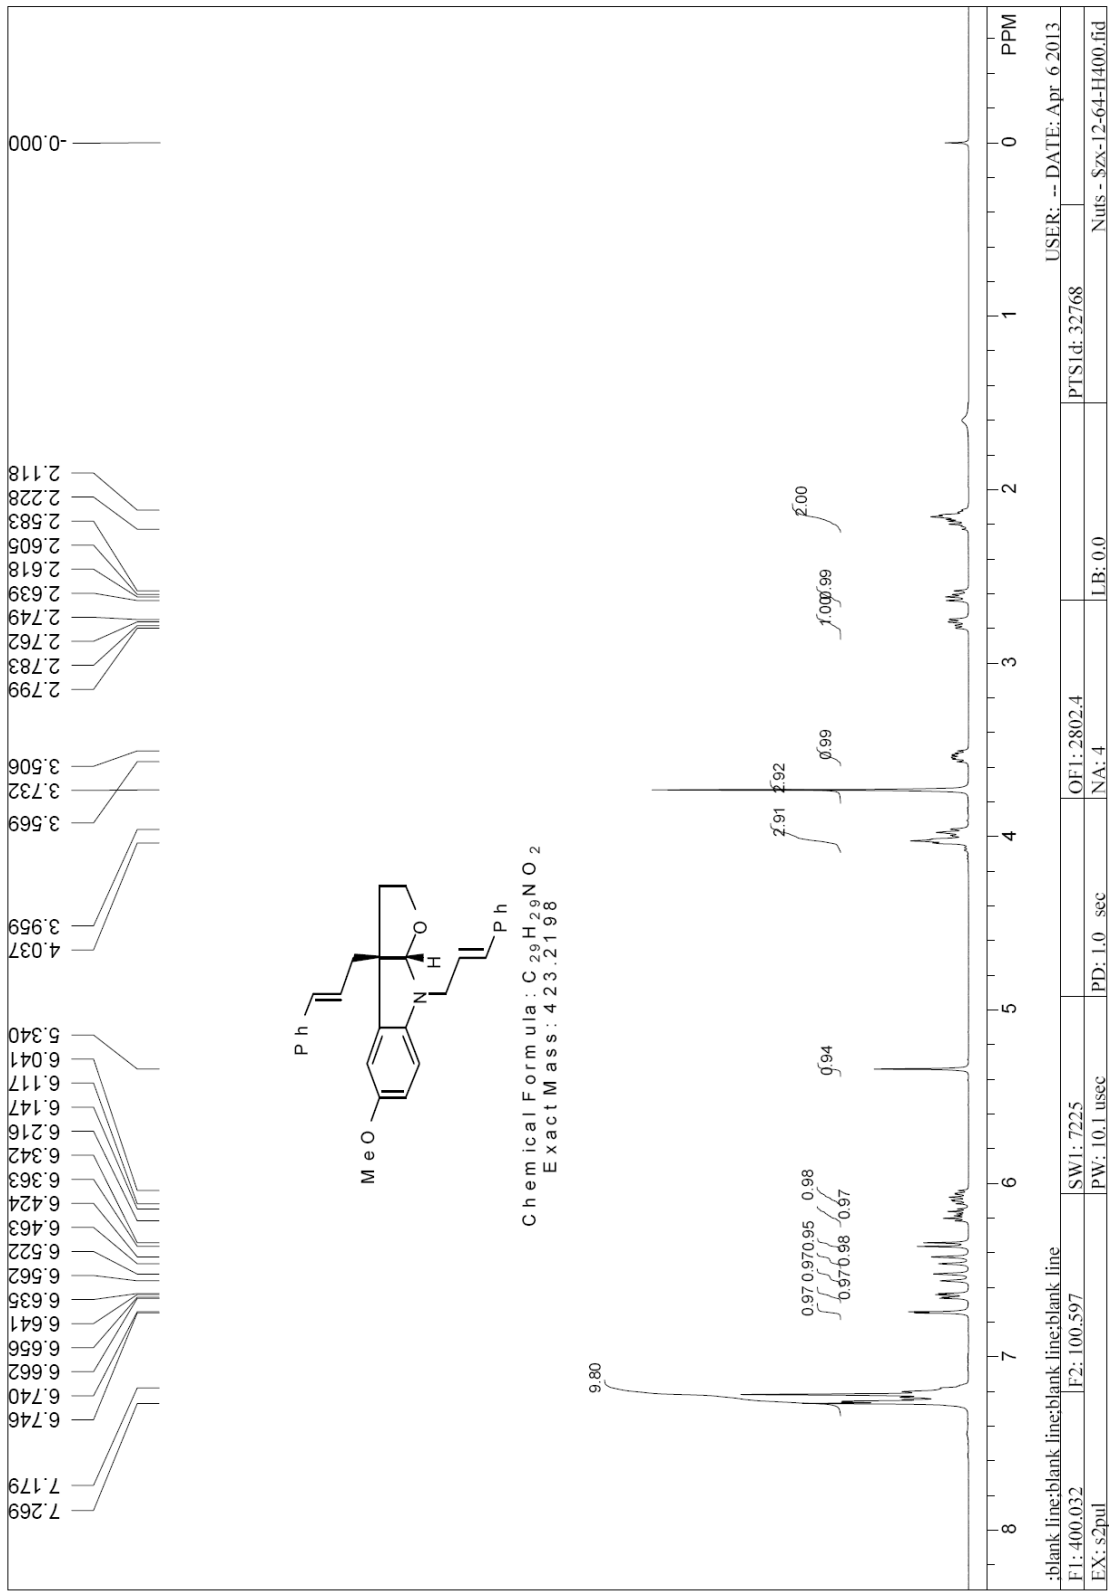

Compound **4da**'s <sup>13</sup>C NMR Spectra

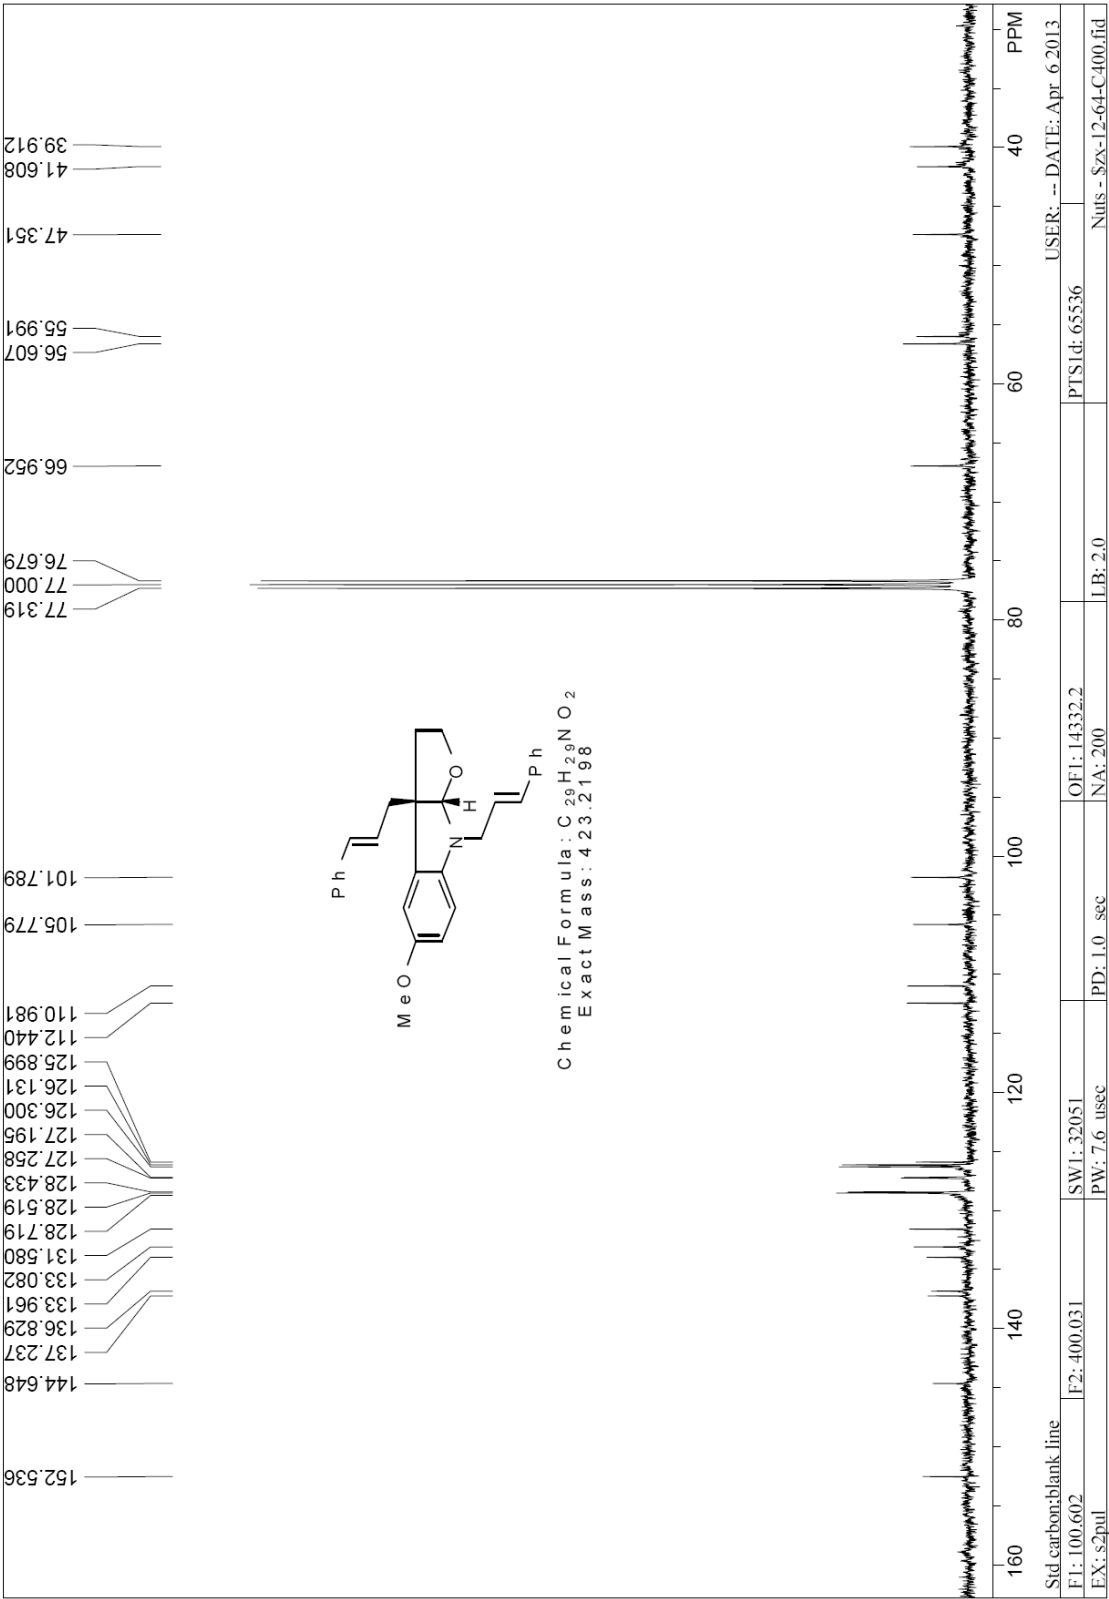

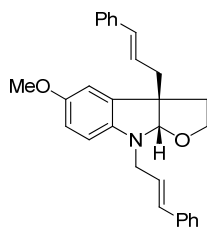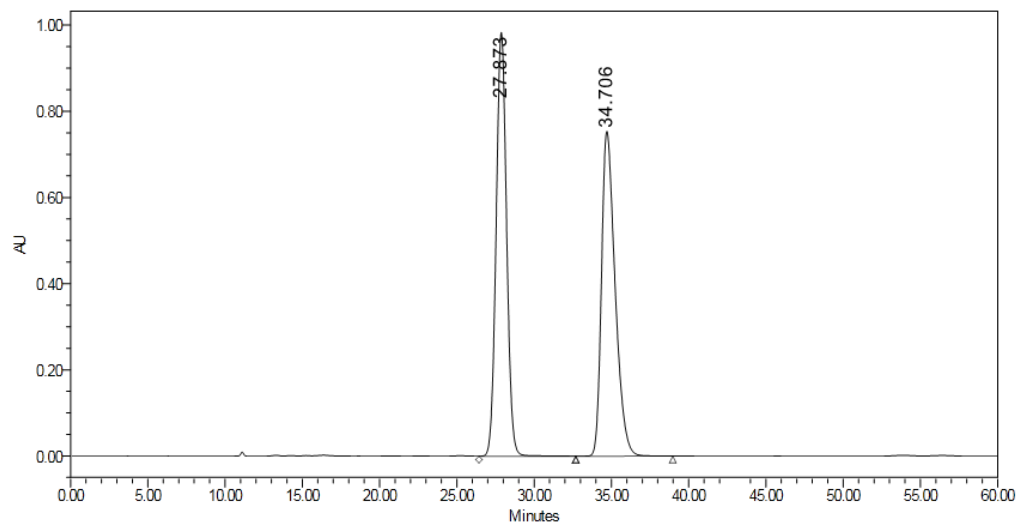

|   | RT<br>(min) | Area<br>( $\mu\text{V}\cdot\text{sec}$ ) | % Area |
|---|-------------|------------------------------------------|--------|
| 1 | 27.873      | 46168421                                 | 50.00  |
| 2 | 34.706      | 46176519                                 | 50.00  |

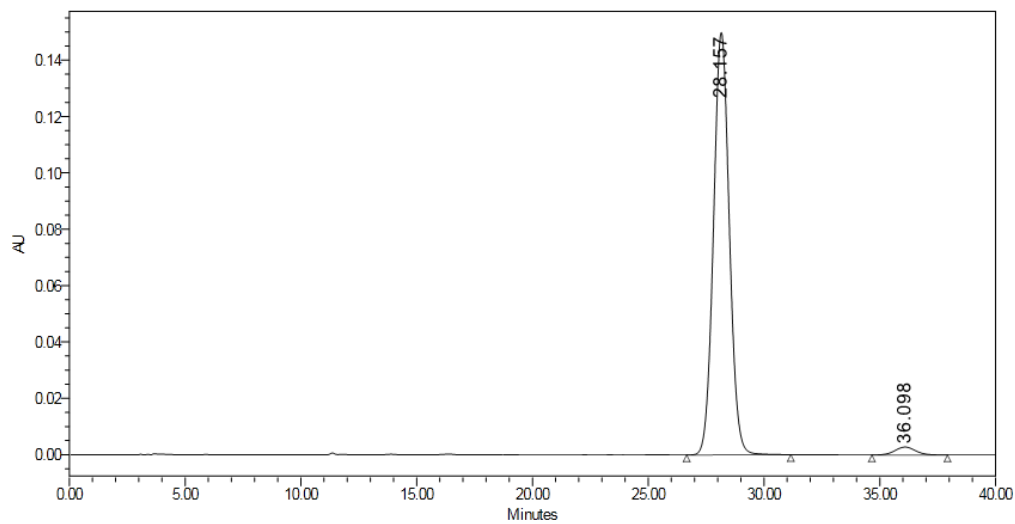

|   | RT<br>(min) | Area<br>( $\mu\text{V}\cdot\text{sec}$ ) | % Area |
|---|-------------|------------------------------------------|--------|
| 1 | 28.157      | 7119307                                  | 97.64  |
| 2 | 36.098      | 172449                                   | 2.36   |

Compound **4ea**'s <sup>1</sup>H NMR Spectra

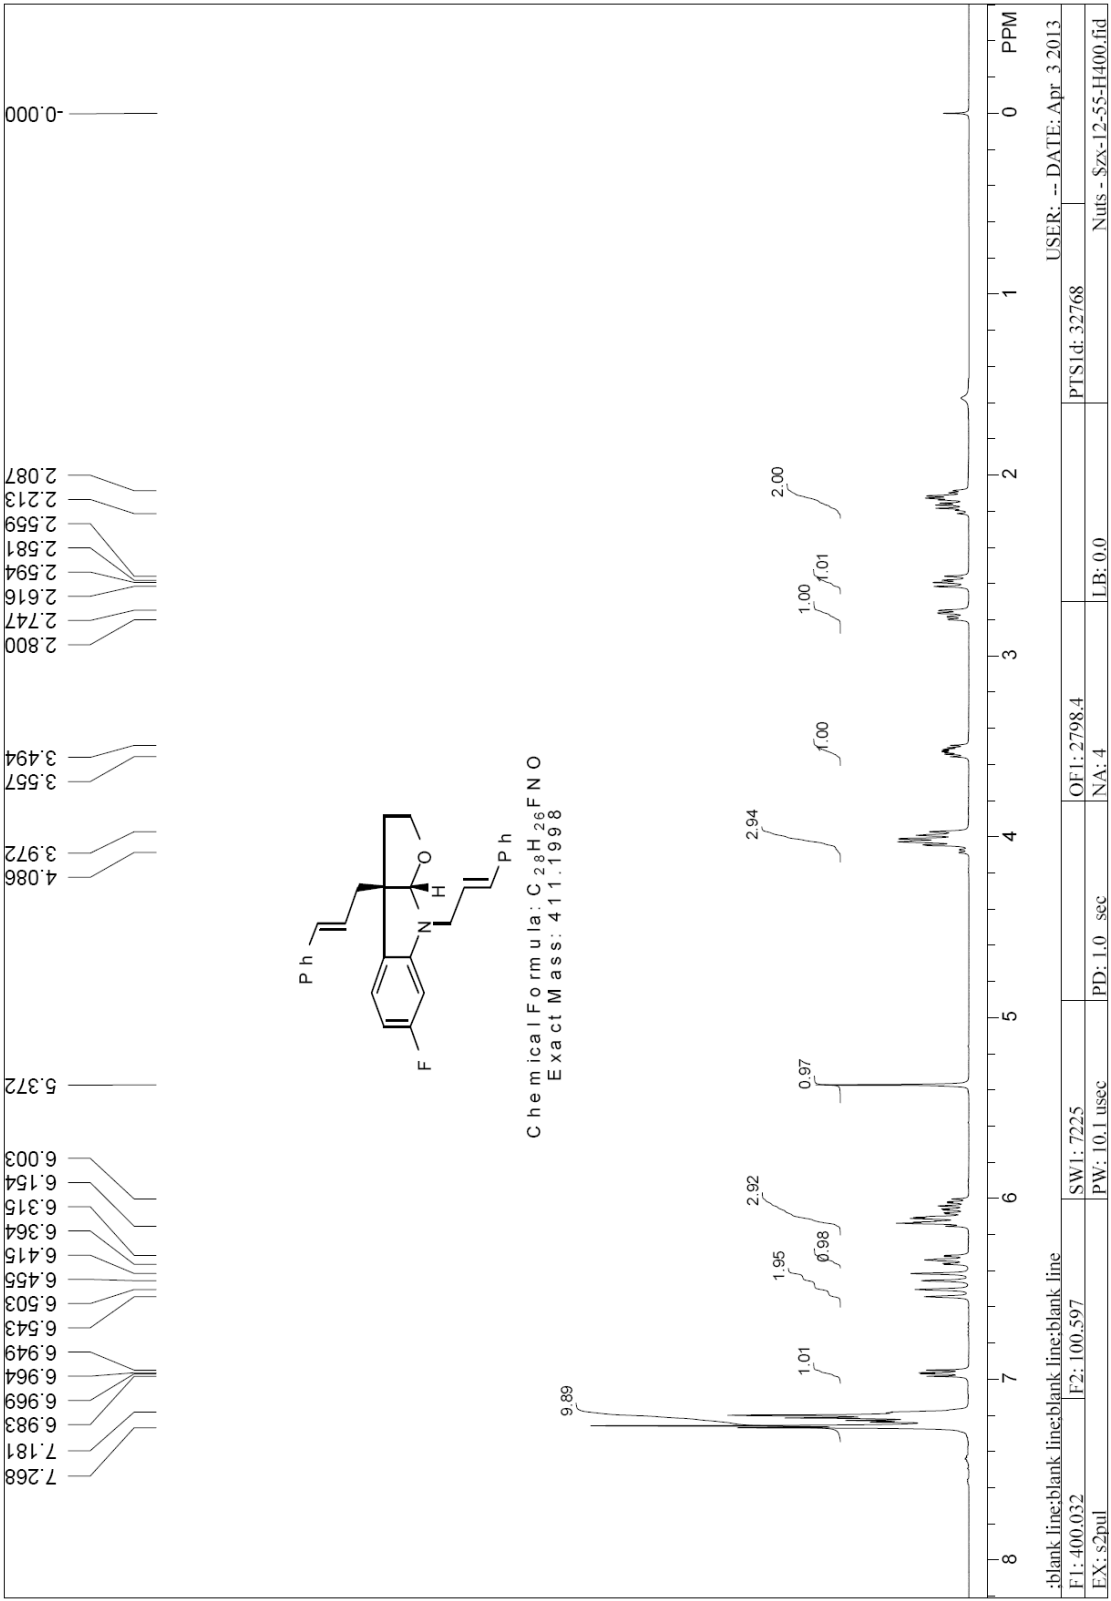

Compound **4ea**'s <sup>13</sup>C NMR Spectra

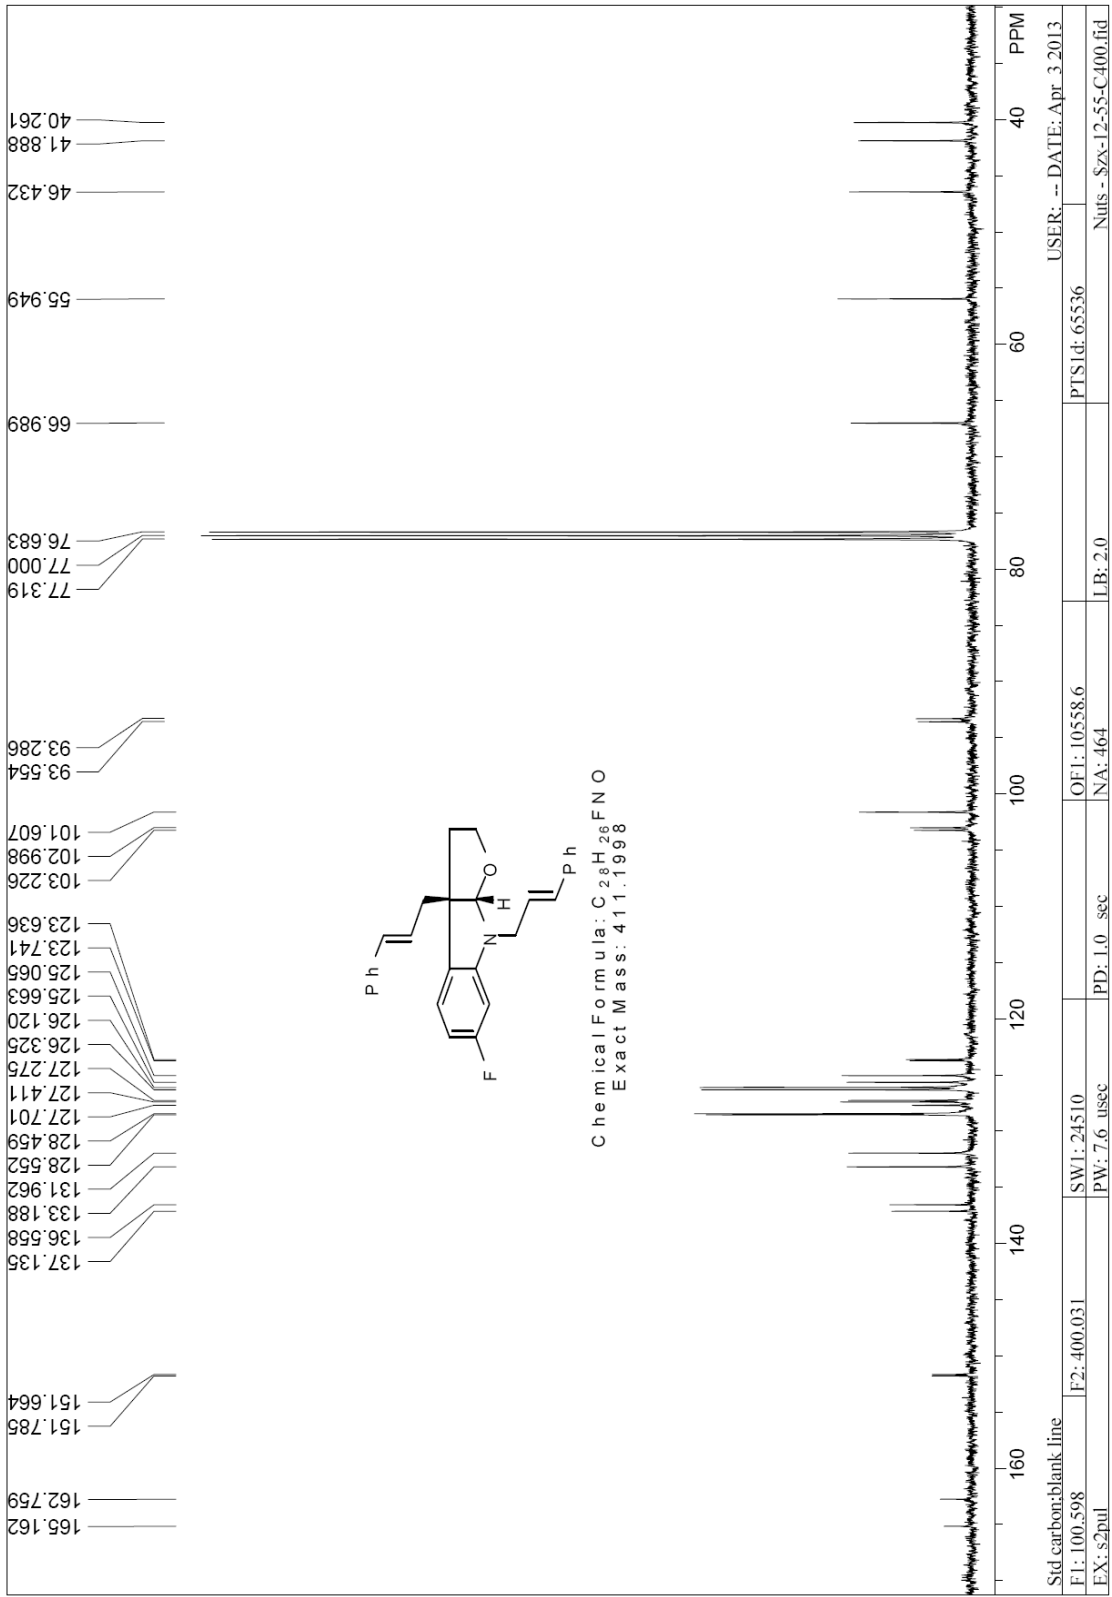

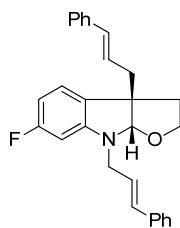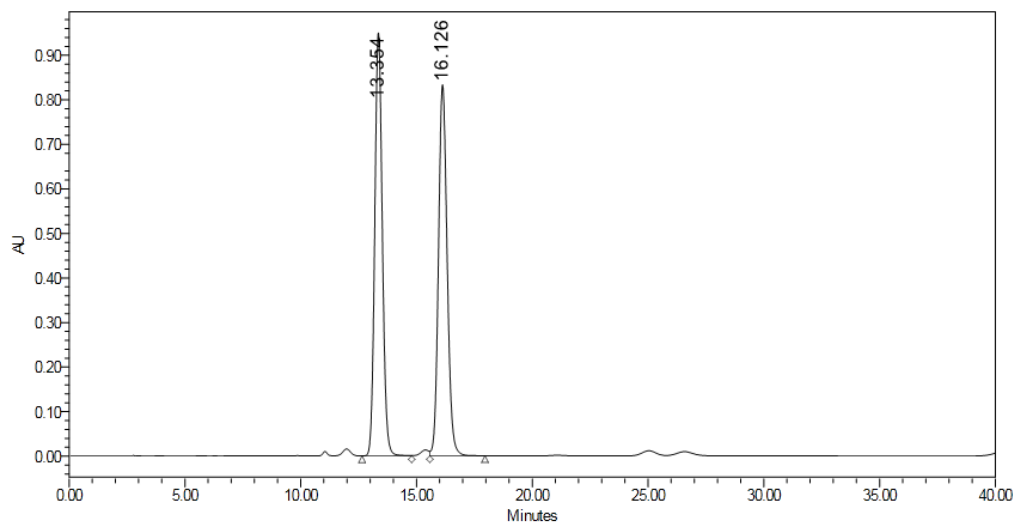

|   | RT<br>(min) | Area<br>( $\mu\text{V}\cdot\text{sec}$ ) | % Area |
|---|-------------|------------------------------------------|--------|
| 1 | 13.354      | 21617009                                 | 49.95  |
| 2 | 16.126      | 21657225                                 | 50.05  |

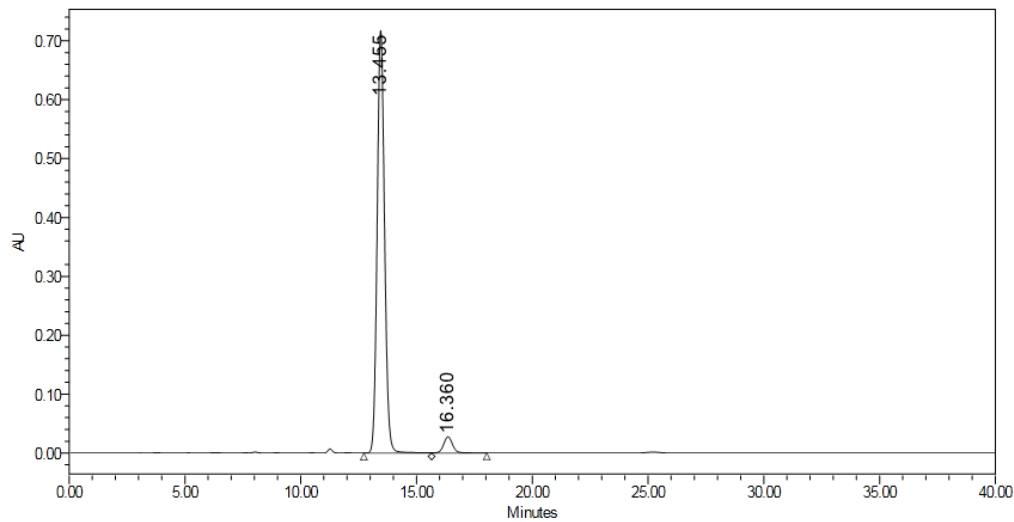

|   | RT<br>(min) | Area<br>( $\mu\text{V}\cdot\text{sec}$ ) | % Area |
|---|-------------|------------------------------------------|--------|
| 1 | 13.455      | 15901995                                 | 95.57  |
| 2 | 16.360      | 736464                                   | 4.43   |



Compound **4fa**'s <sup>1</sup>H NMR Spectra

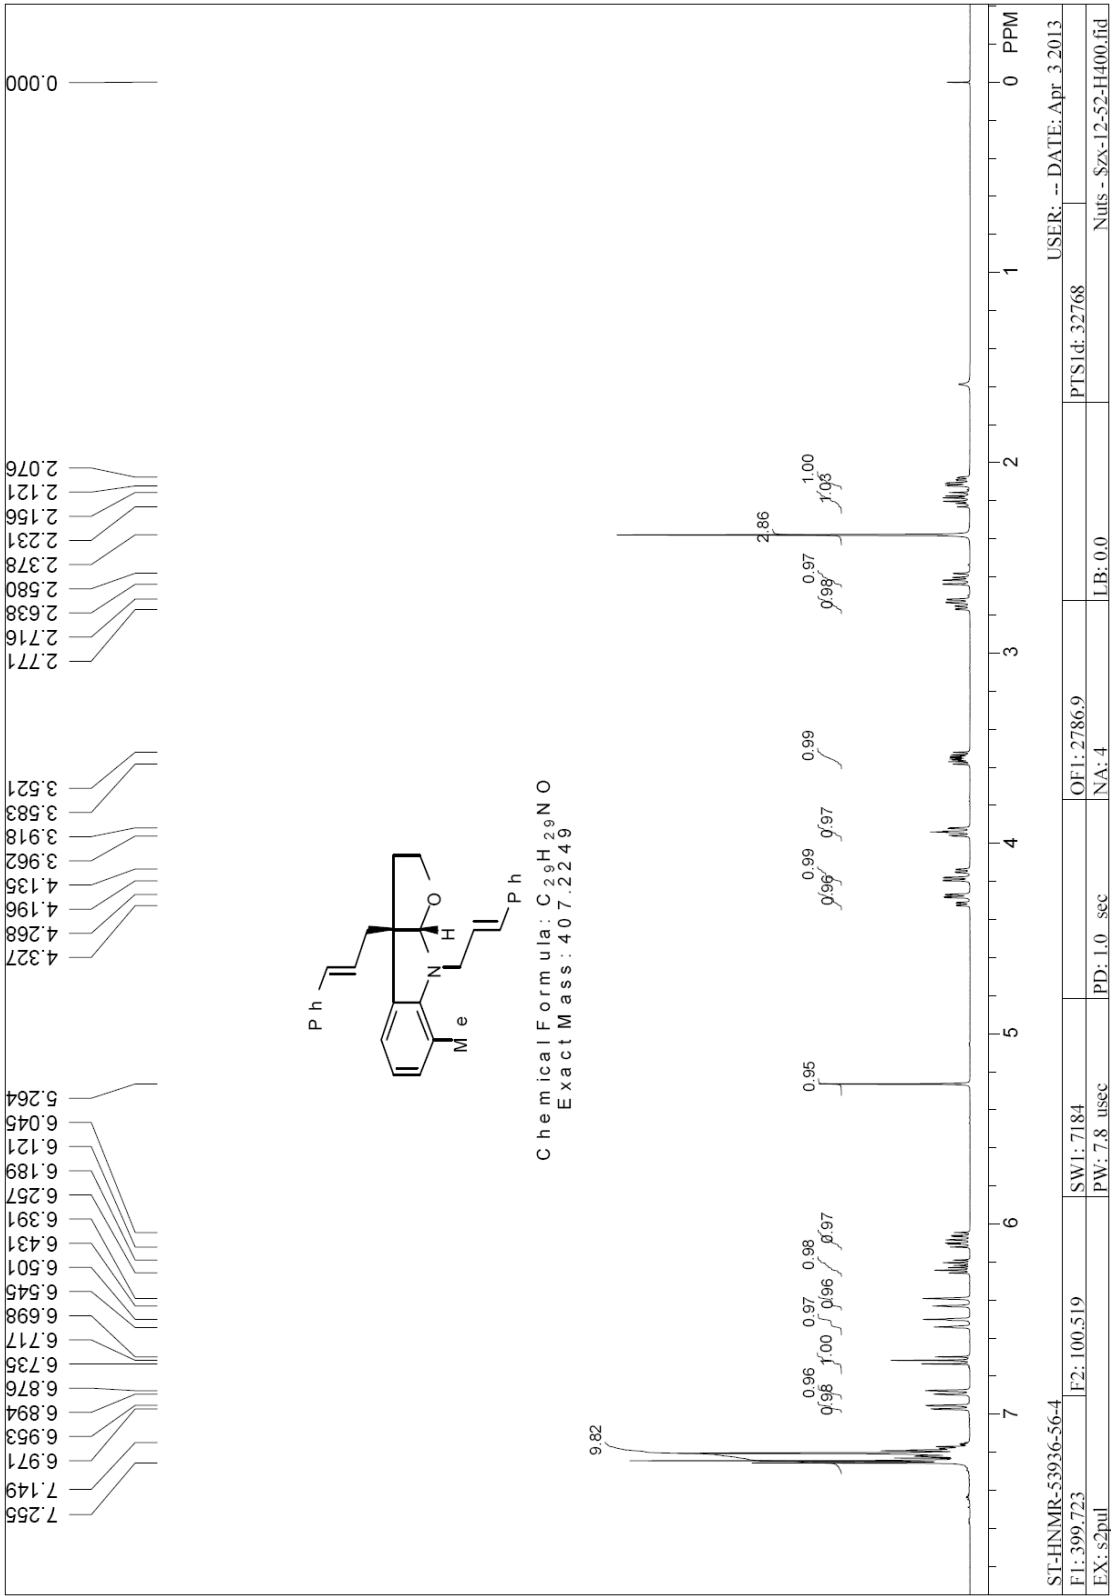

Compound **4fa**'s <sup>13</sup>C NMR Spectra

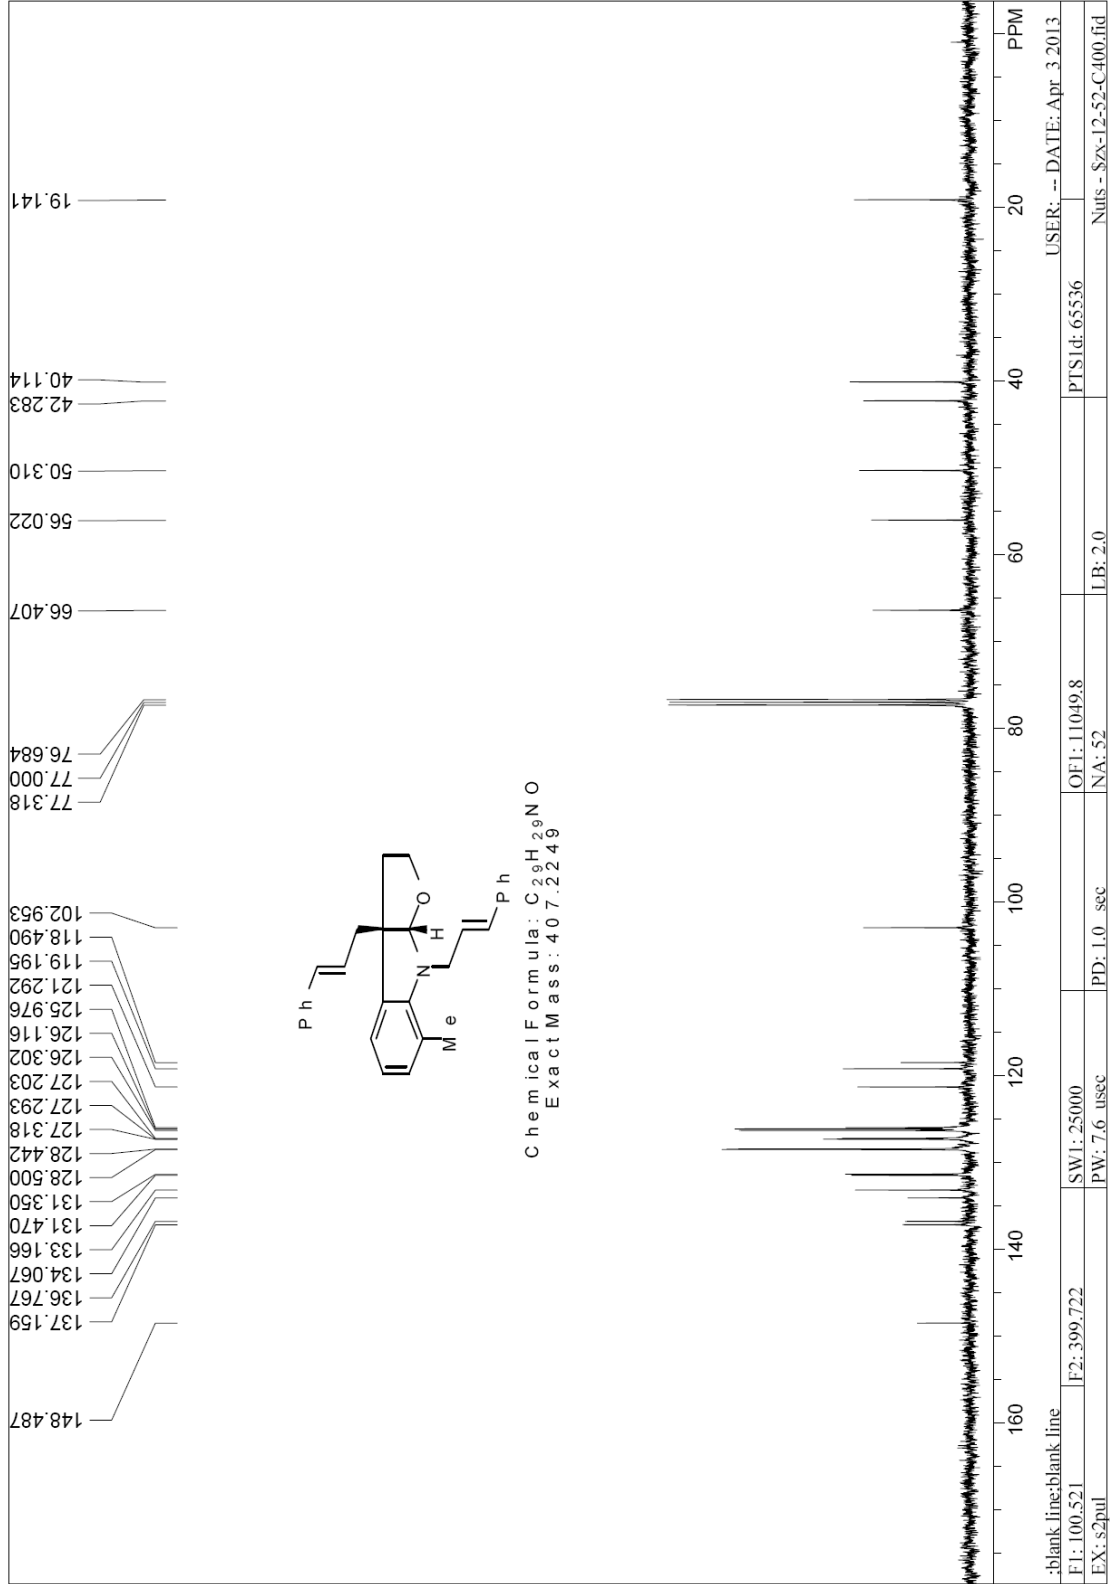

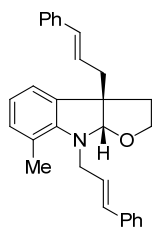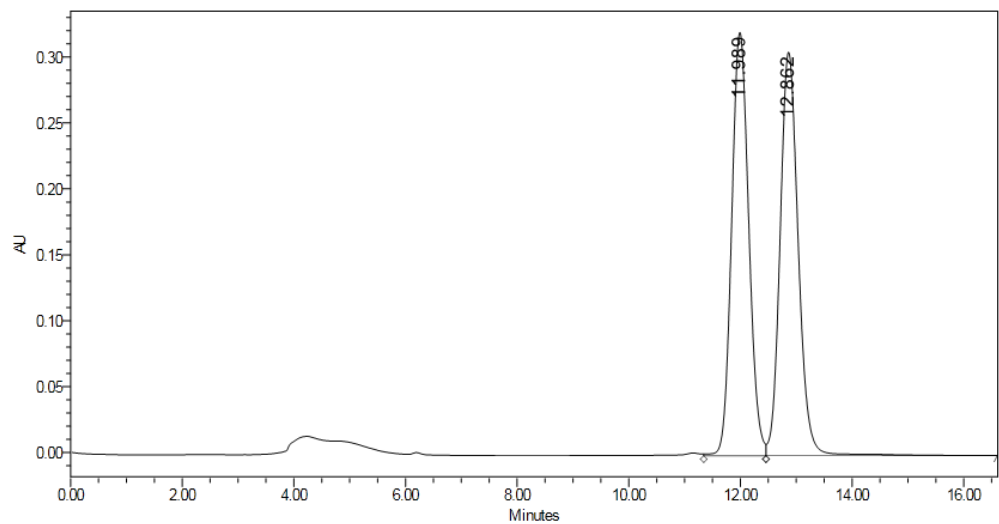

|   | RT<br>(min) | Area<br>( $\mu\text{V}\cdot\text{sec}$ ) | % Area |
|---|-------------|------------------------------------------|--------|
| 1 | 11.989      | 6836705                                  | 49.66  |
| 2 | 12.862      | 6929806                                  | 50.34  |

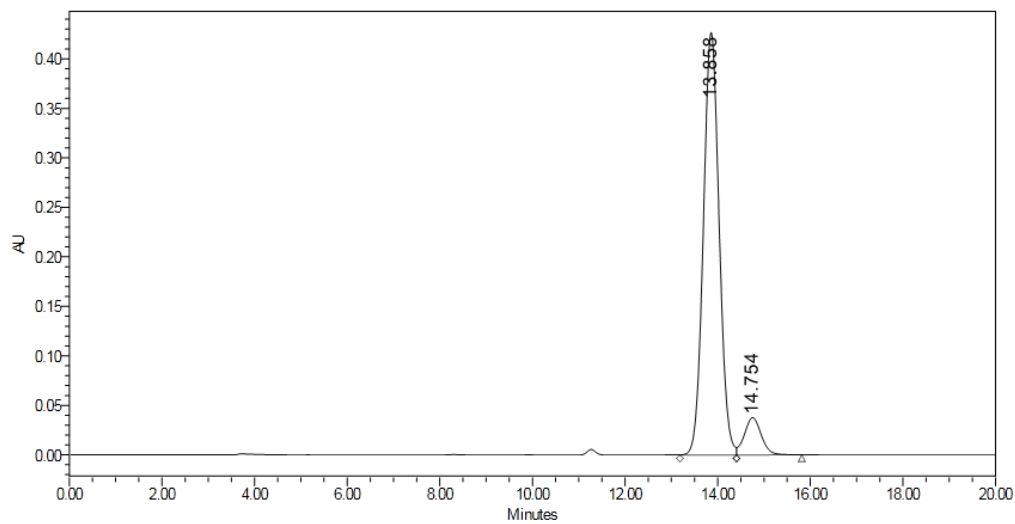

|   | RT<br>(min) | Area<br>( $\mu\text{V}\cdot\text{sec}$ ) | % Area |
|---|-------------|------------------------------------------|--------|
| 1 | 13.858      | 10071358                                 | 91.39  |
| 2 | 14.754      | 948998                                   | 8.61   |

Compound **4ci**'s <sup>1</sup>H NMR Spectra

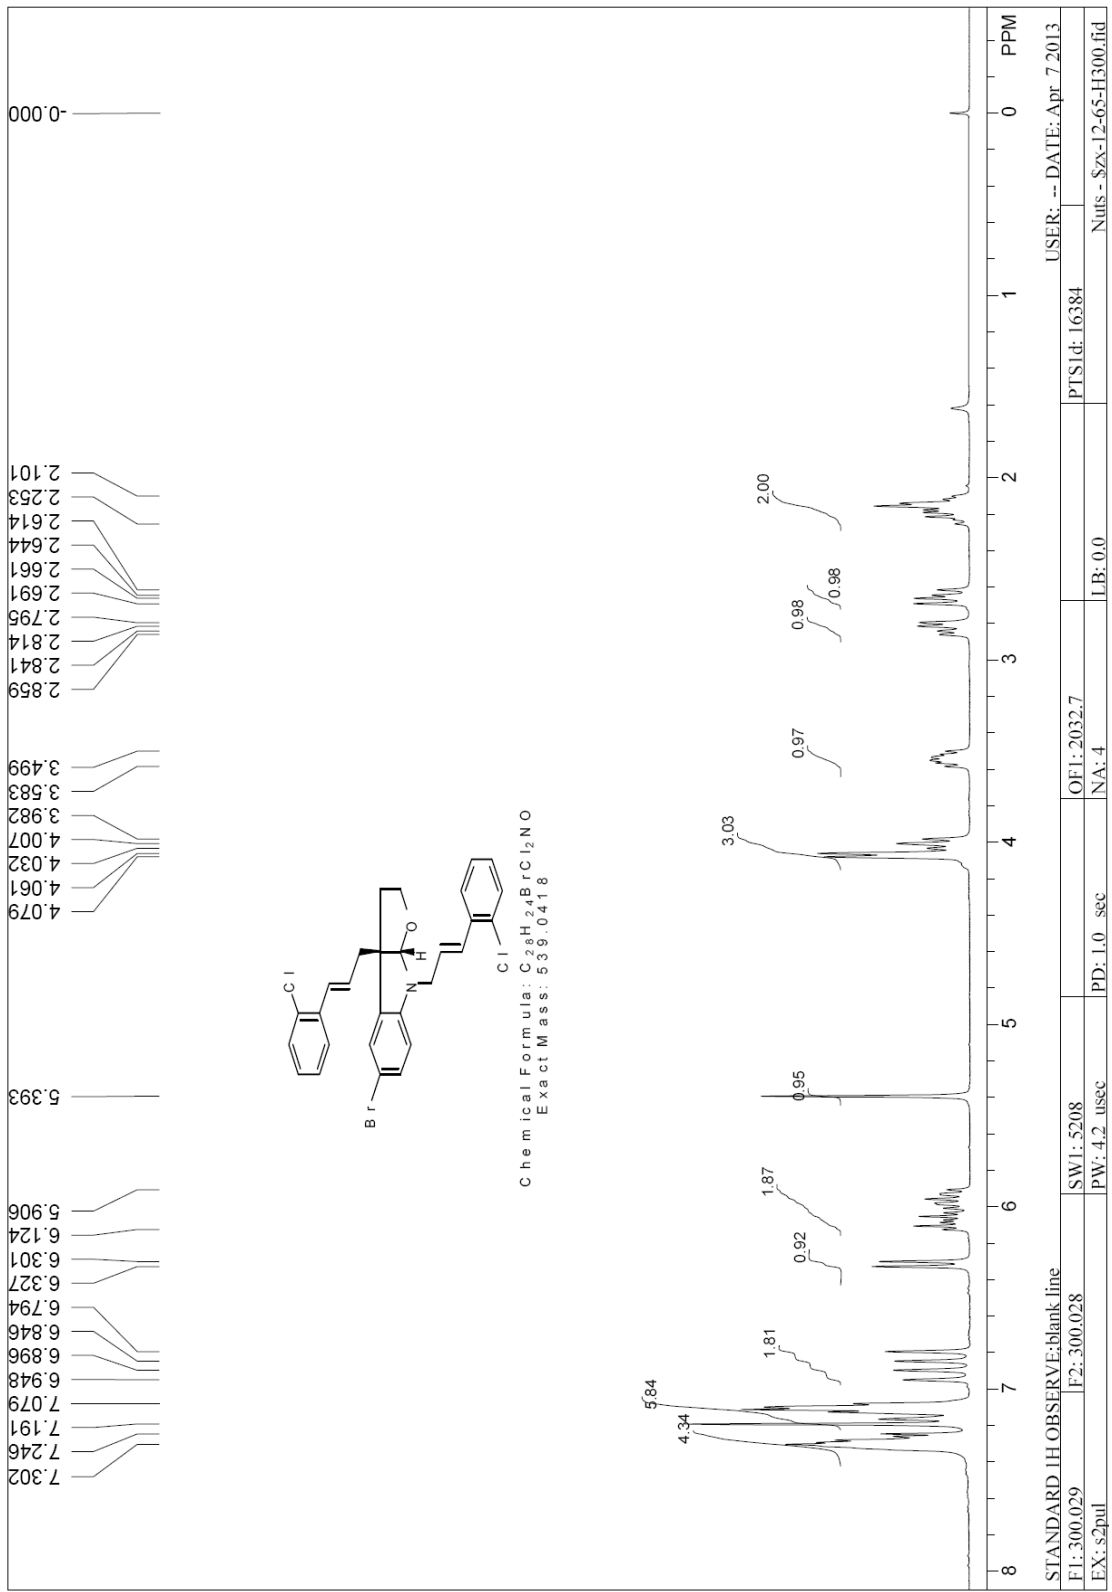

Compound **4ci**'s <sup>13</sup>C NMR Spectra

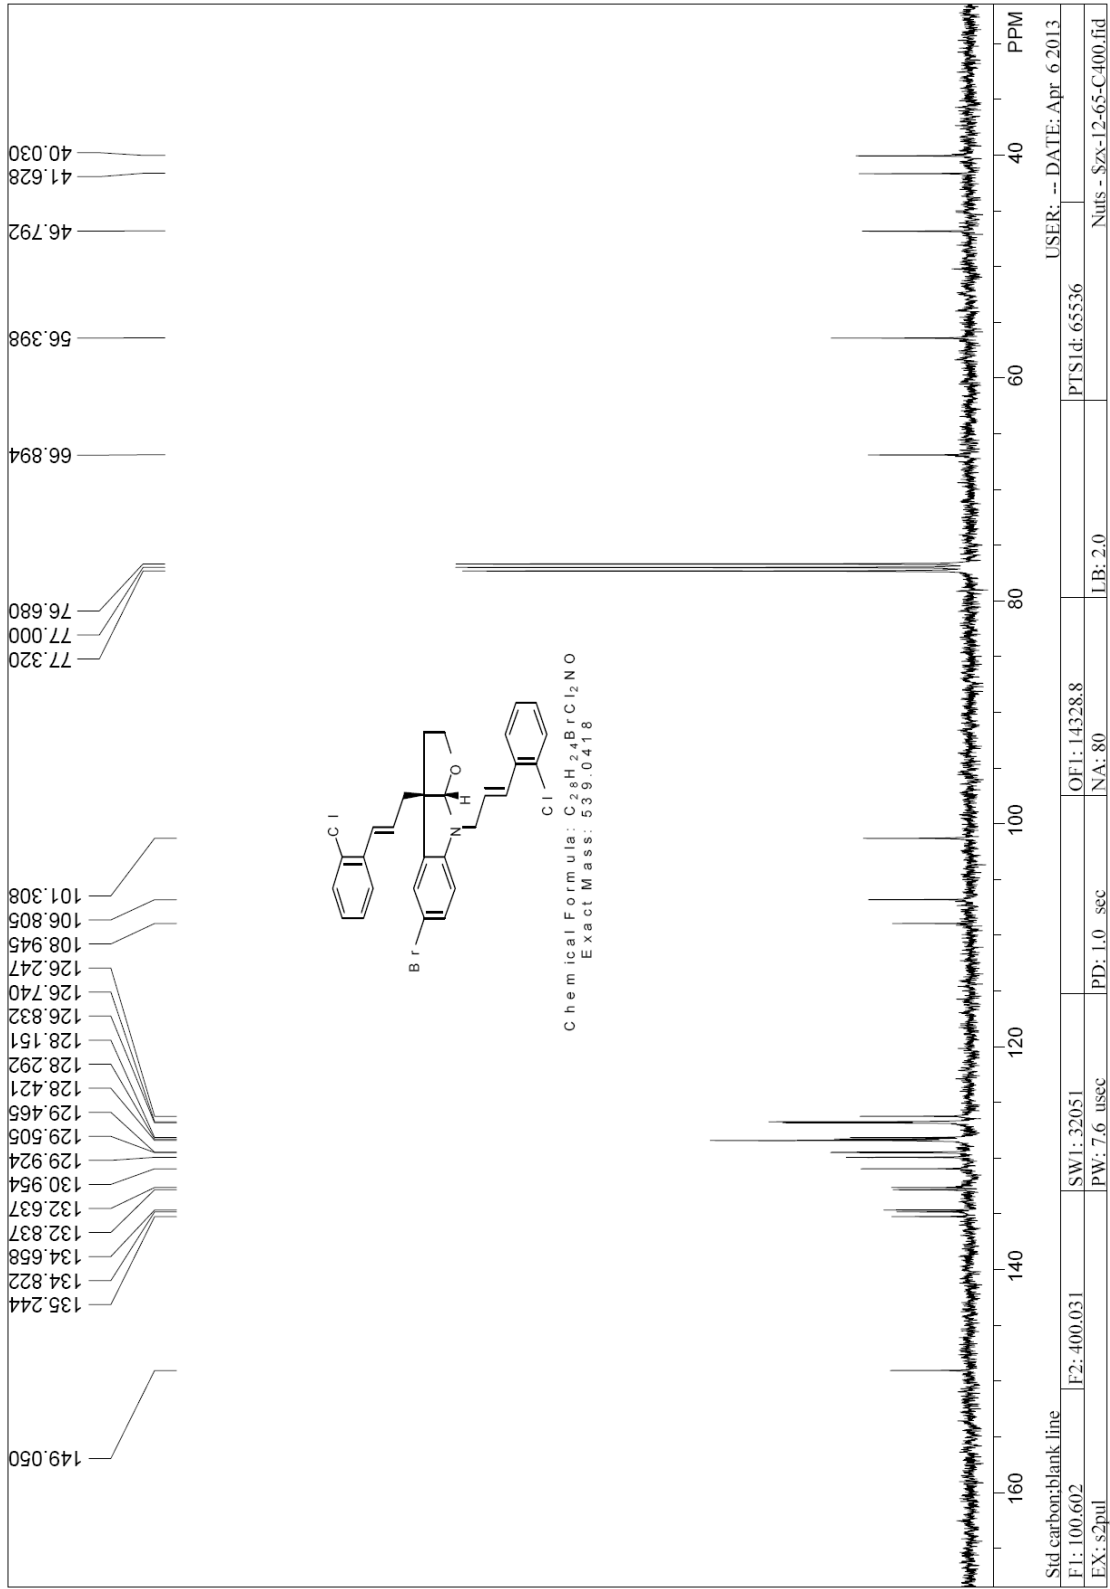

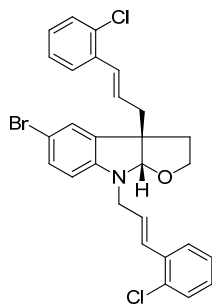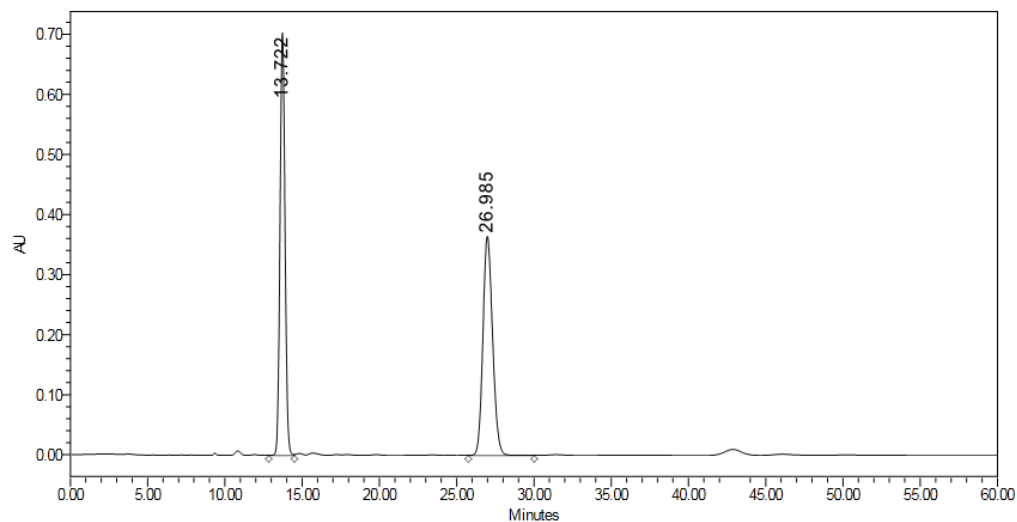

|   | RT<br>(min) | Area<br>( $\mu\text{V}\cdot\text{sec}$ ) | % Area |
|---|-------------|------------------------------------------|--------|
| 1 | 13.722      | 15849786                                 | 49.96  |
| 2 | 26.985      | 15874520                                 | 50.04  |

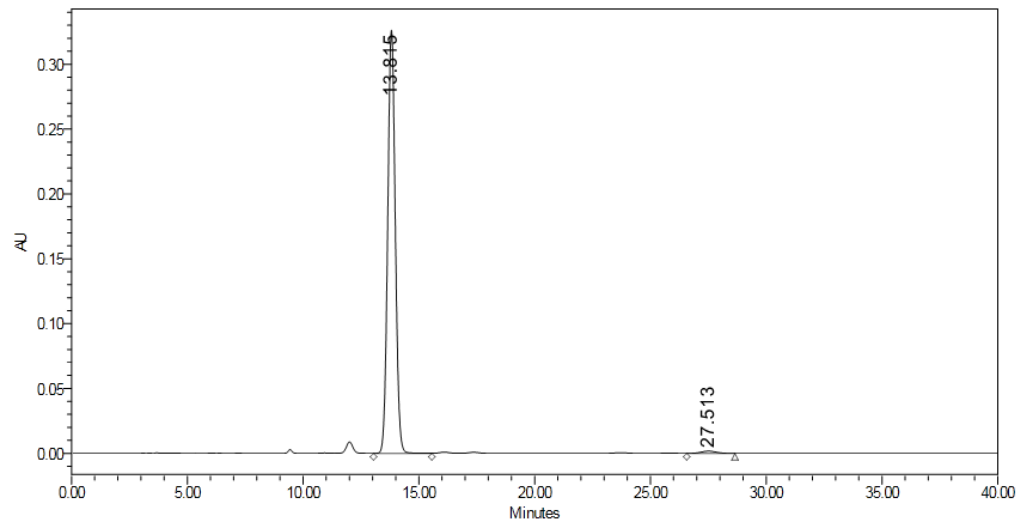

|   | RT<br>(min) | Area<br>( $\mu\text{V}\cdot\text{sec}$ ) | % Area |
|---|-------------|------------------------------------------|--------|
| 1 | 13.815      | 7392553                                  | 98.97  |
| 2 | 27.513      | 77083                                    | 1.03   |

Compound **4ga**'s  $^1\text{H}$  NMR Spectra

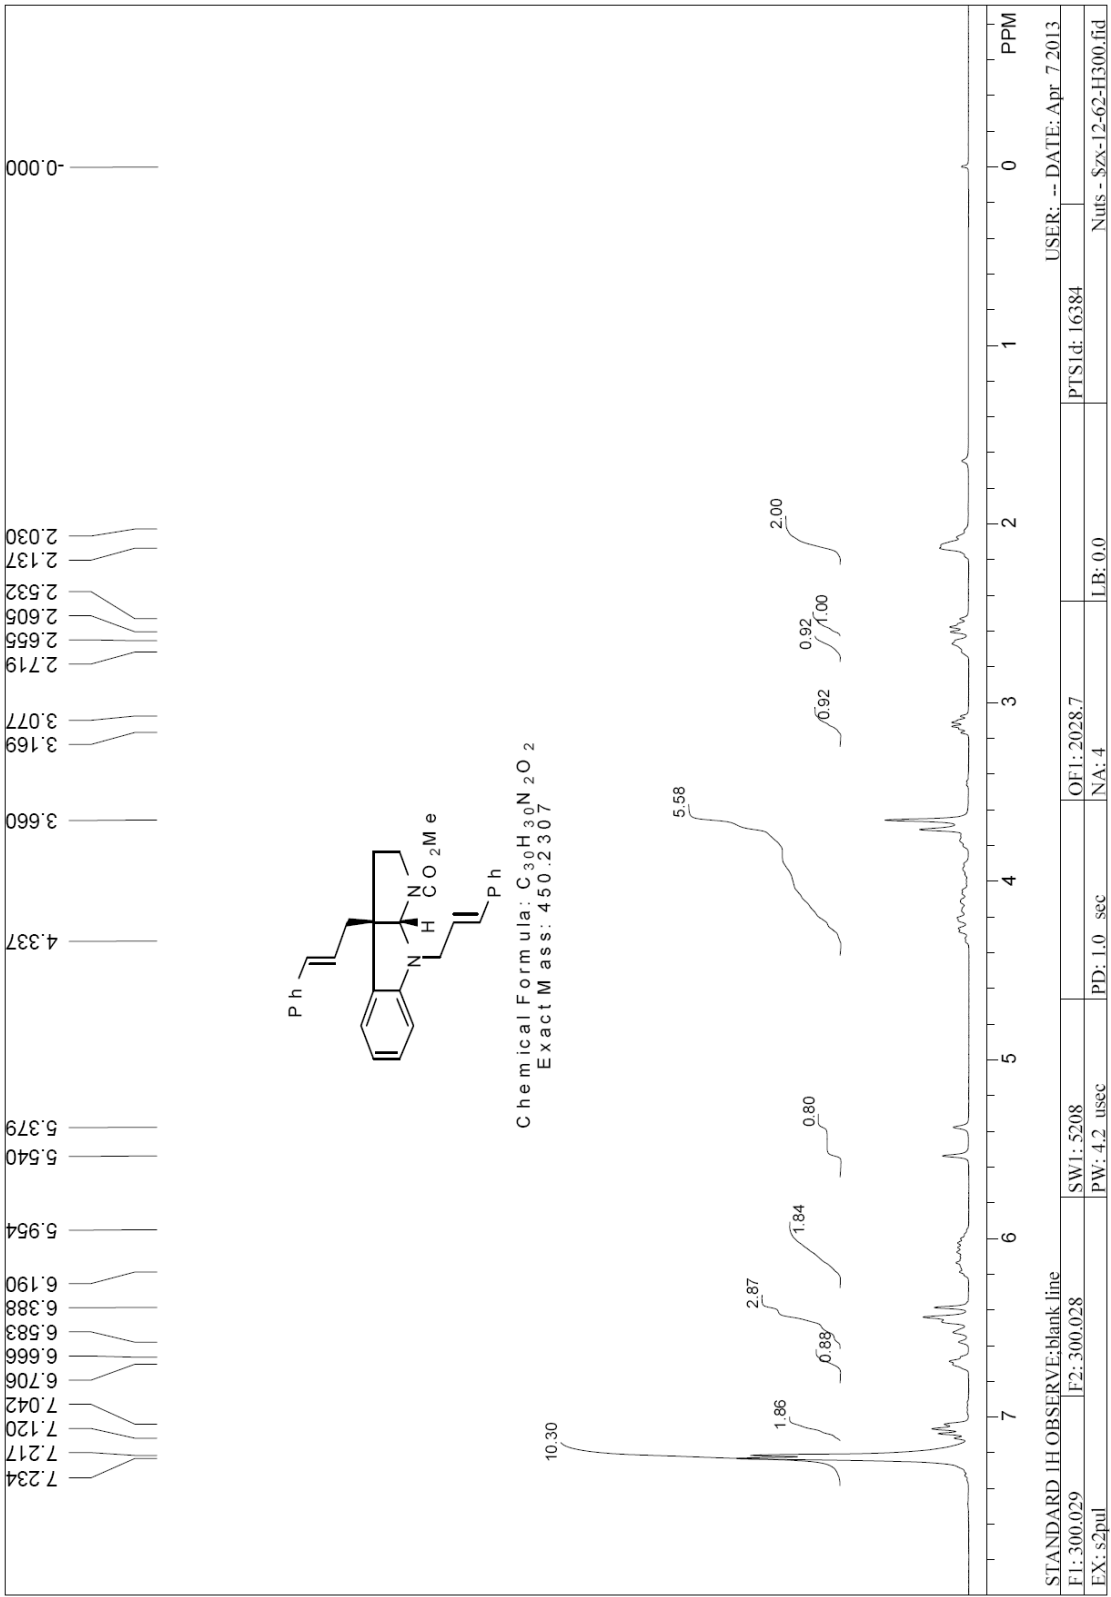

Compound **4ga**'s  $^{13}\text{C}$  NMR Spectra

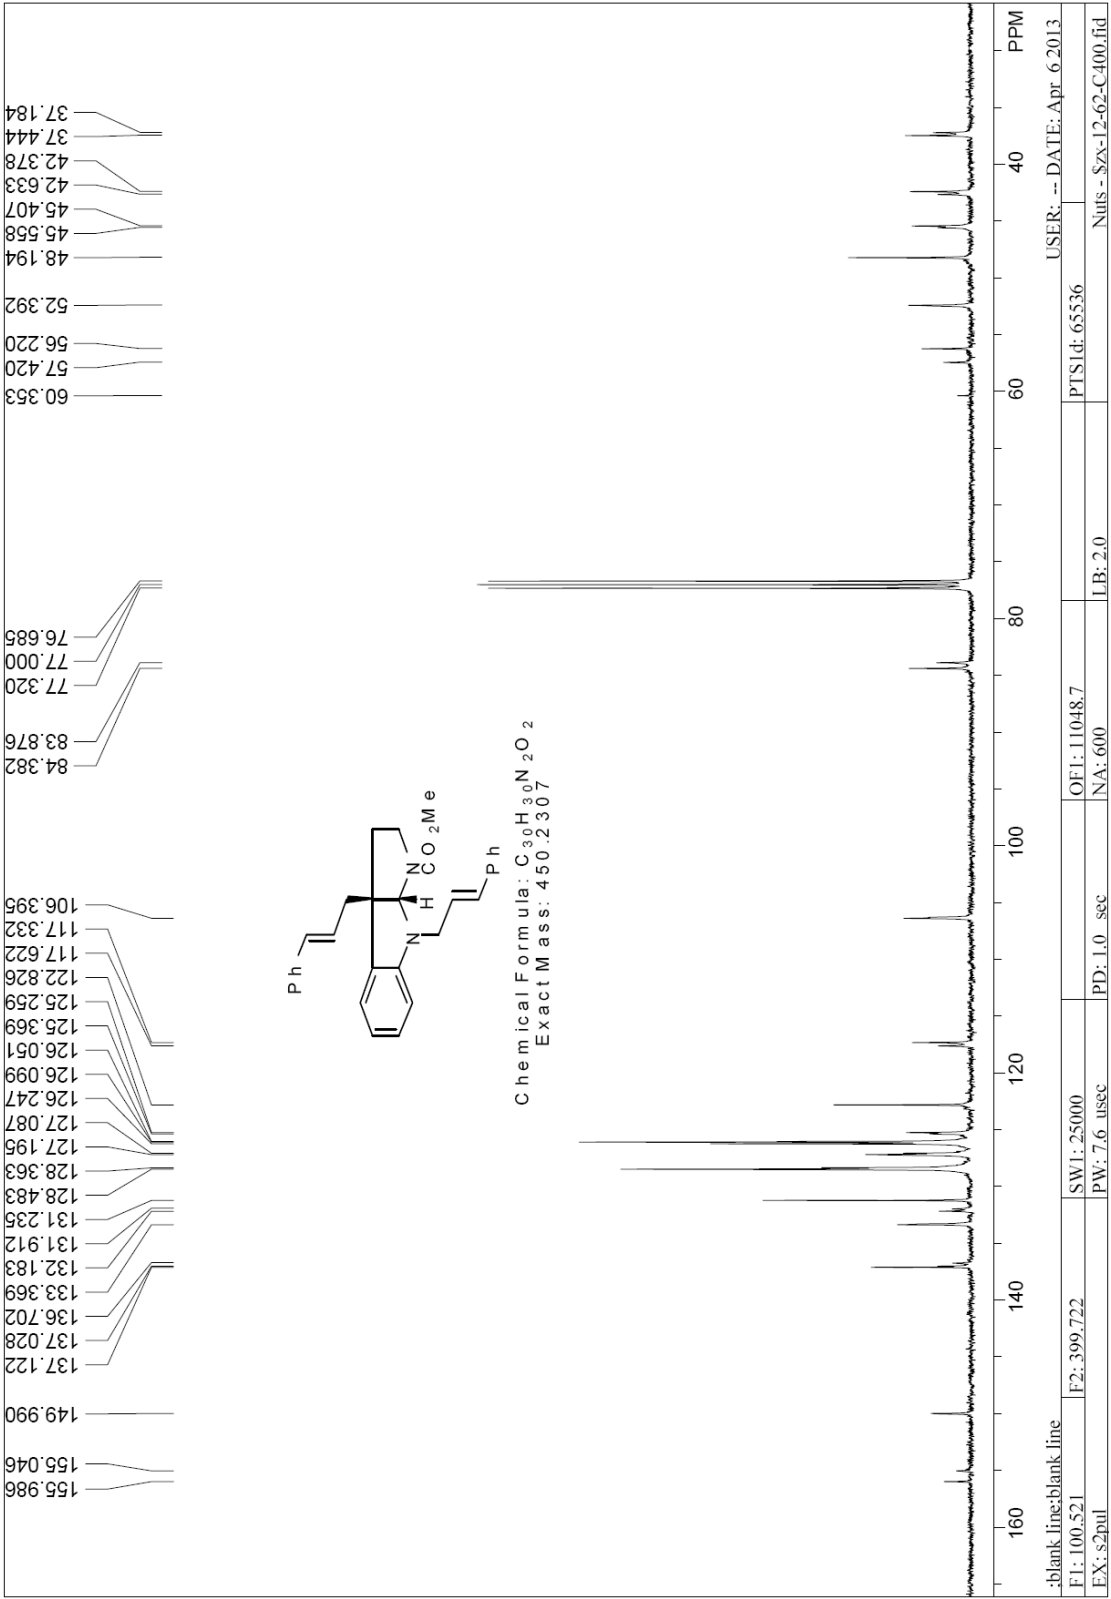



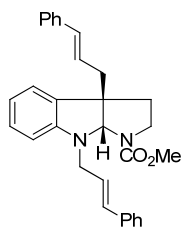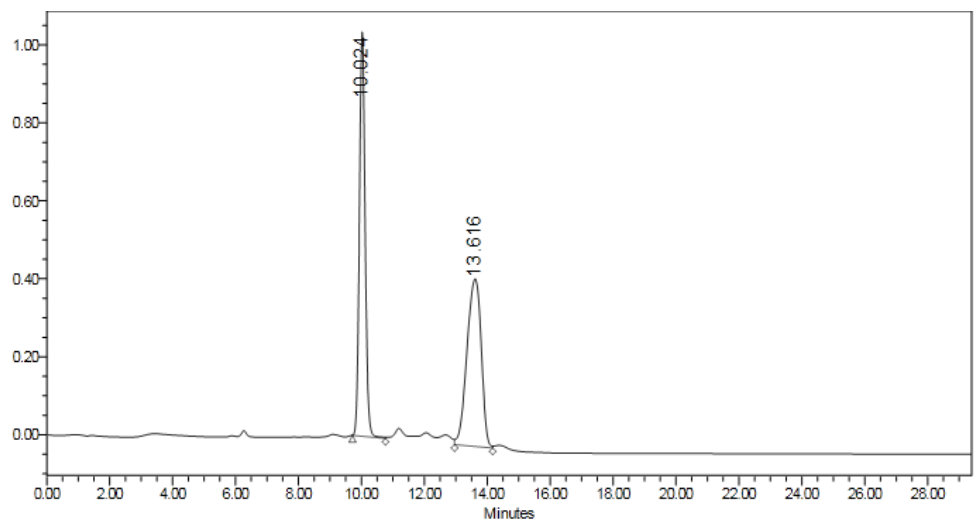

|   | RT<br>(min) | Area<br>( $\mu\text{V}\cdot\text{sec}$ ) | % Area |
|---|-------------|------------------------------------------|--------|
| 1 | 10.024      | 13097253                                 | 49.17  |
| 2 | 13.616      | 13541732                                 | 50.83  |

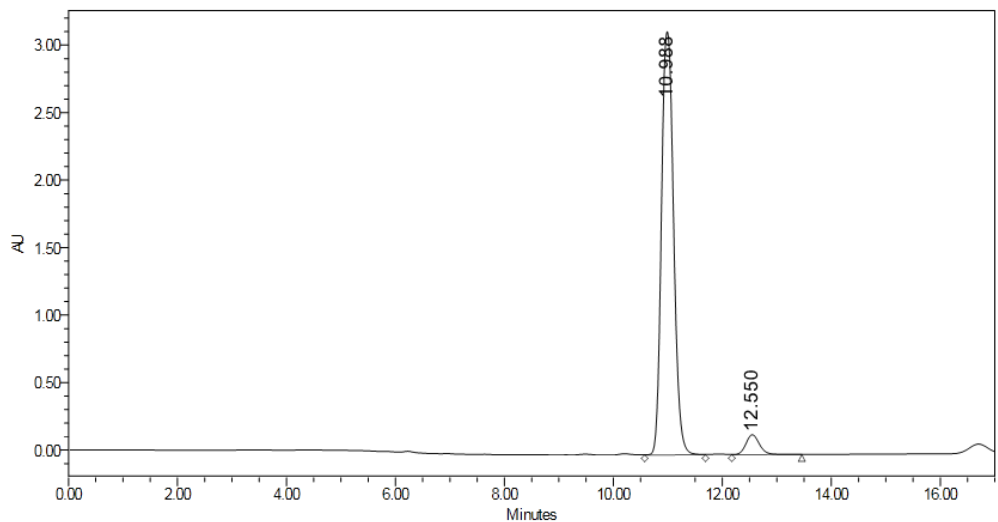

|   | RT<br>(min) | Area<br>( $\mu\text{V}\cdot\text{sec}$ ) | % Area |
|---|-------------|------------------------------------------|--------|
| 1 | 10.988      | 48464867                                 | 95.04  |
| 2 | 12.550      | 2530103                                  | 4.96   |

Compound **4ha**'s <sup>1</sup>H NMR Spectra

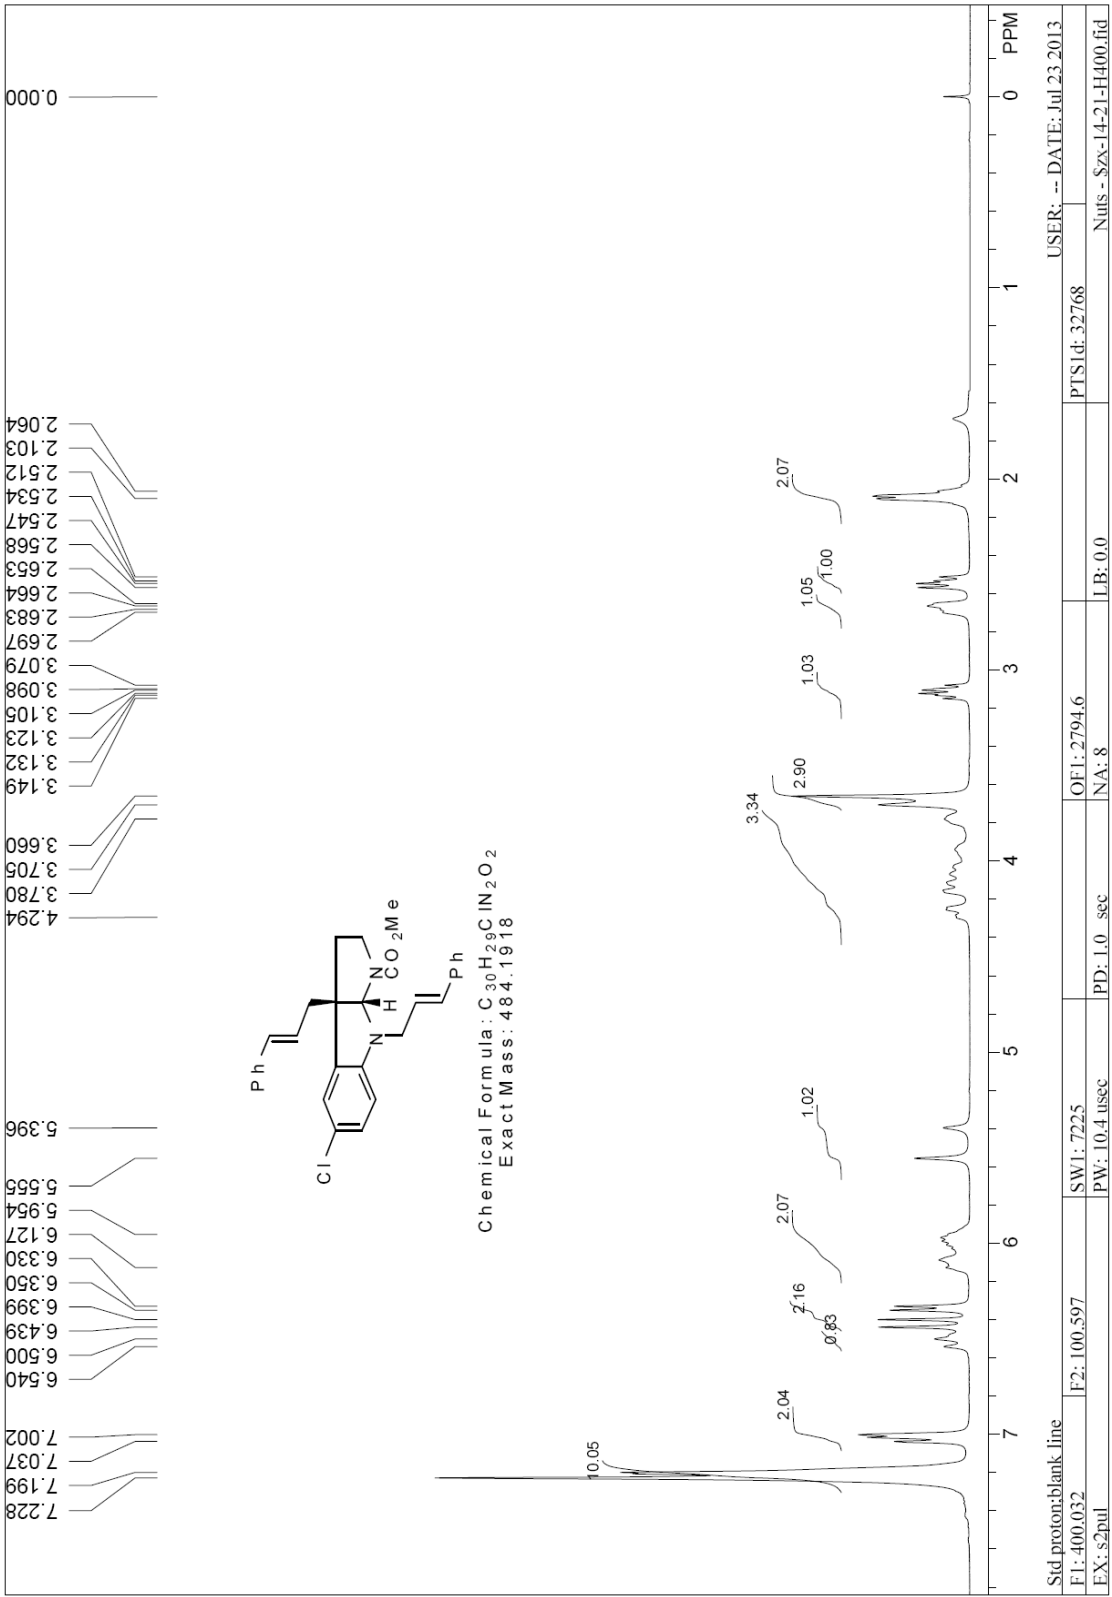

Compound **4ha**'s <sup>13</sup>C NMR Spectra

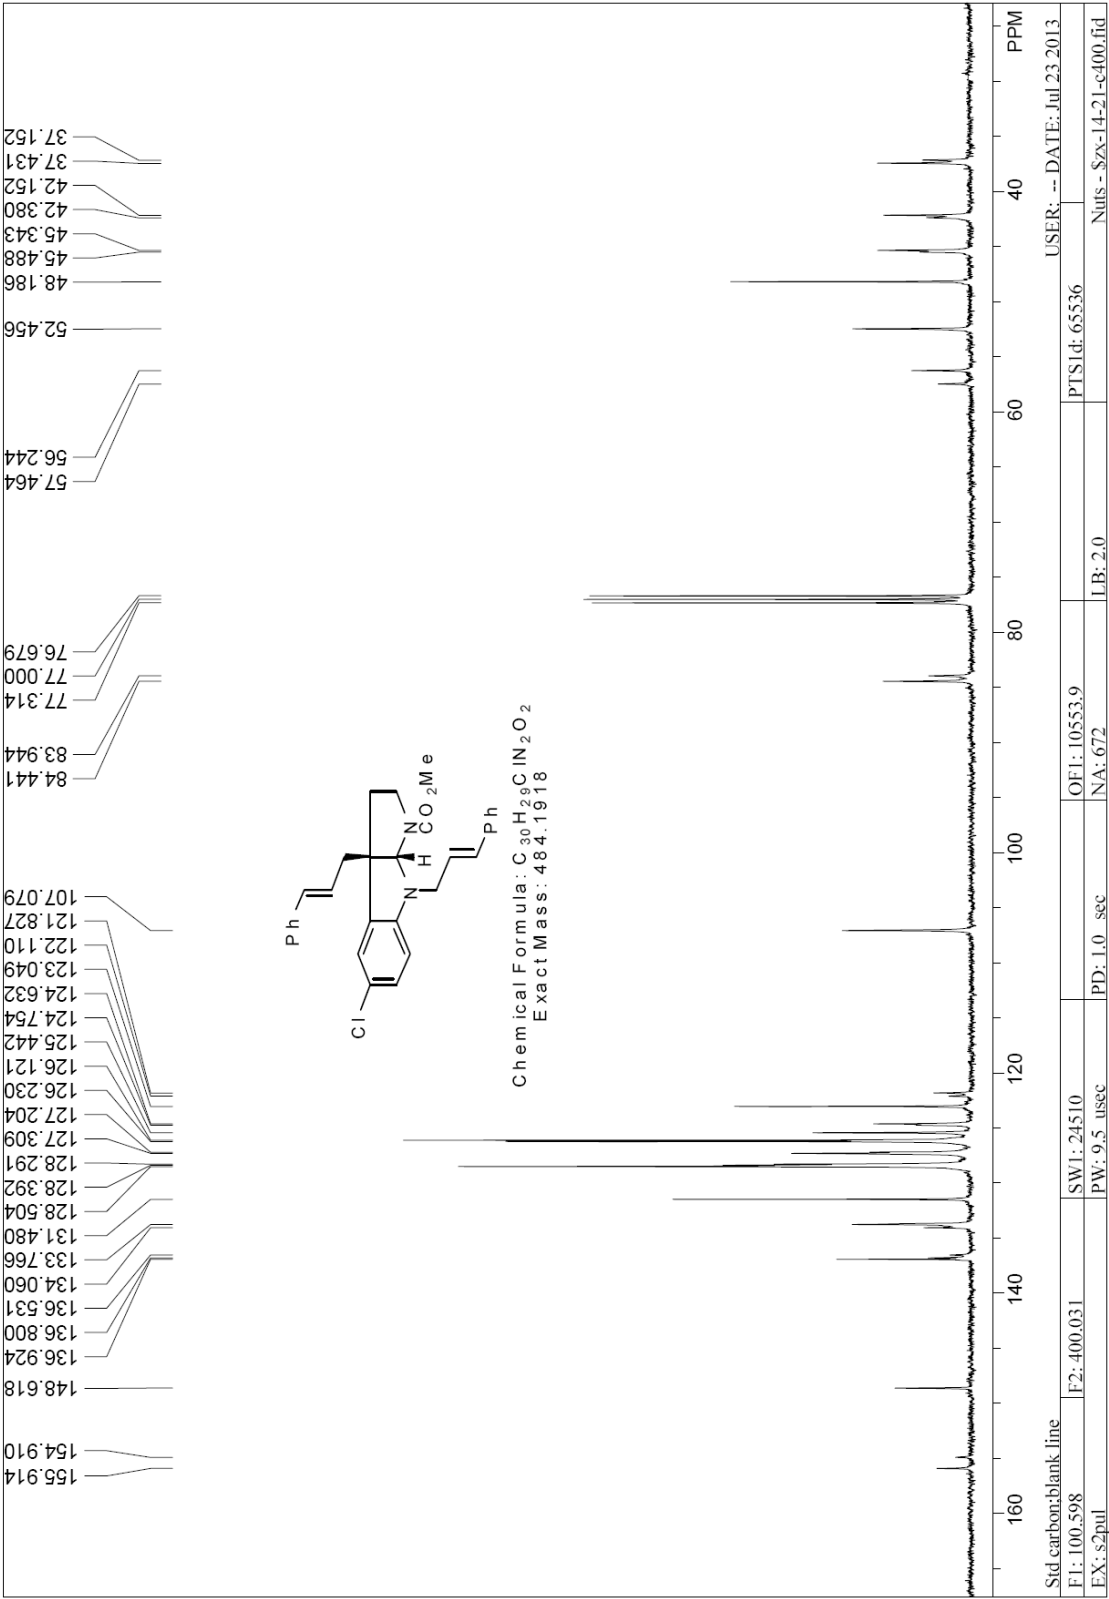

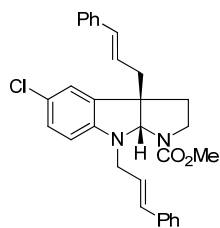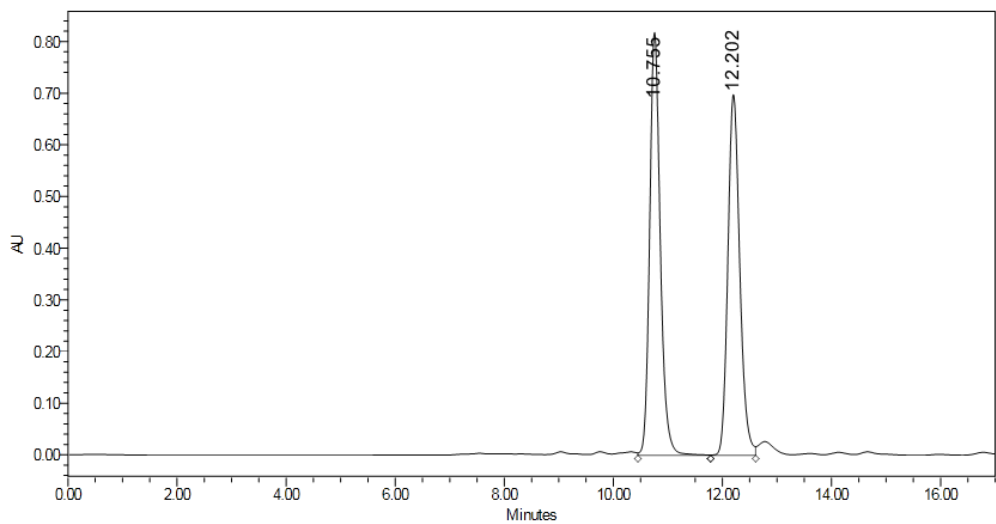

|   | RT<br>(min) | Area<br>( $\mu\text{V}\cdot\text{sec}$ ) | % Area |
|---|-------------|------------------------------------------|--------|
| 1 | 10.755      | 11041804                                 | 51.05  |
| 2 | 12.202      | 10586031                                 | 48.95  |

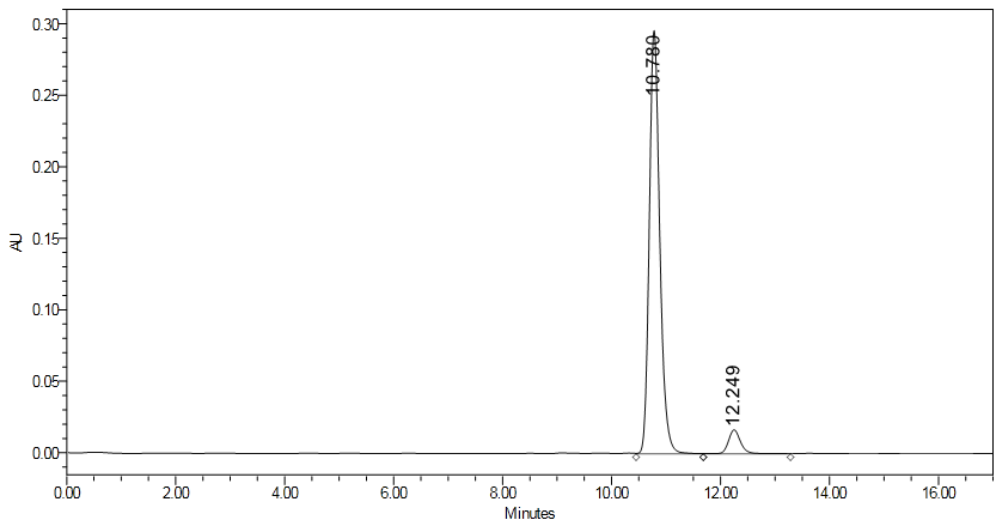

|   | RT<br>(min) | Area<br>( $\mu\text{V}\cdot\text{sec}$ ) | % Area |
|---|-------------|------------------------------------------|--------|
| 1 | 10.780      | 3946302                                  | 93.86  |
| 2 | 12.249      | 258241                                   | 6.14   |

Compound **4ia**'s <sup>1</sup>H NMR Spectra

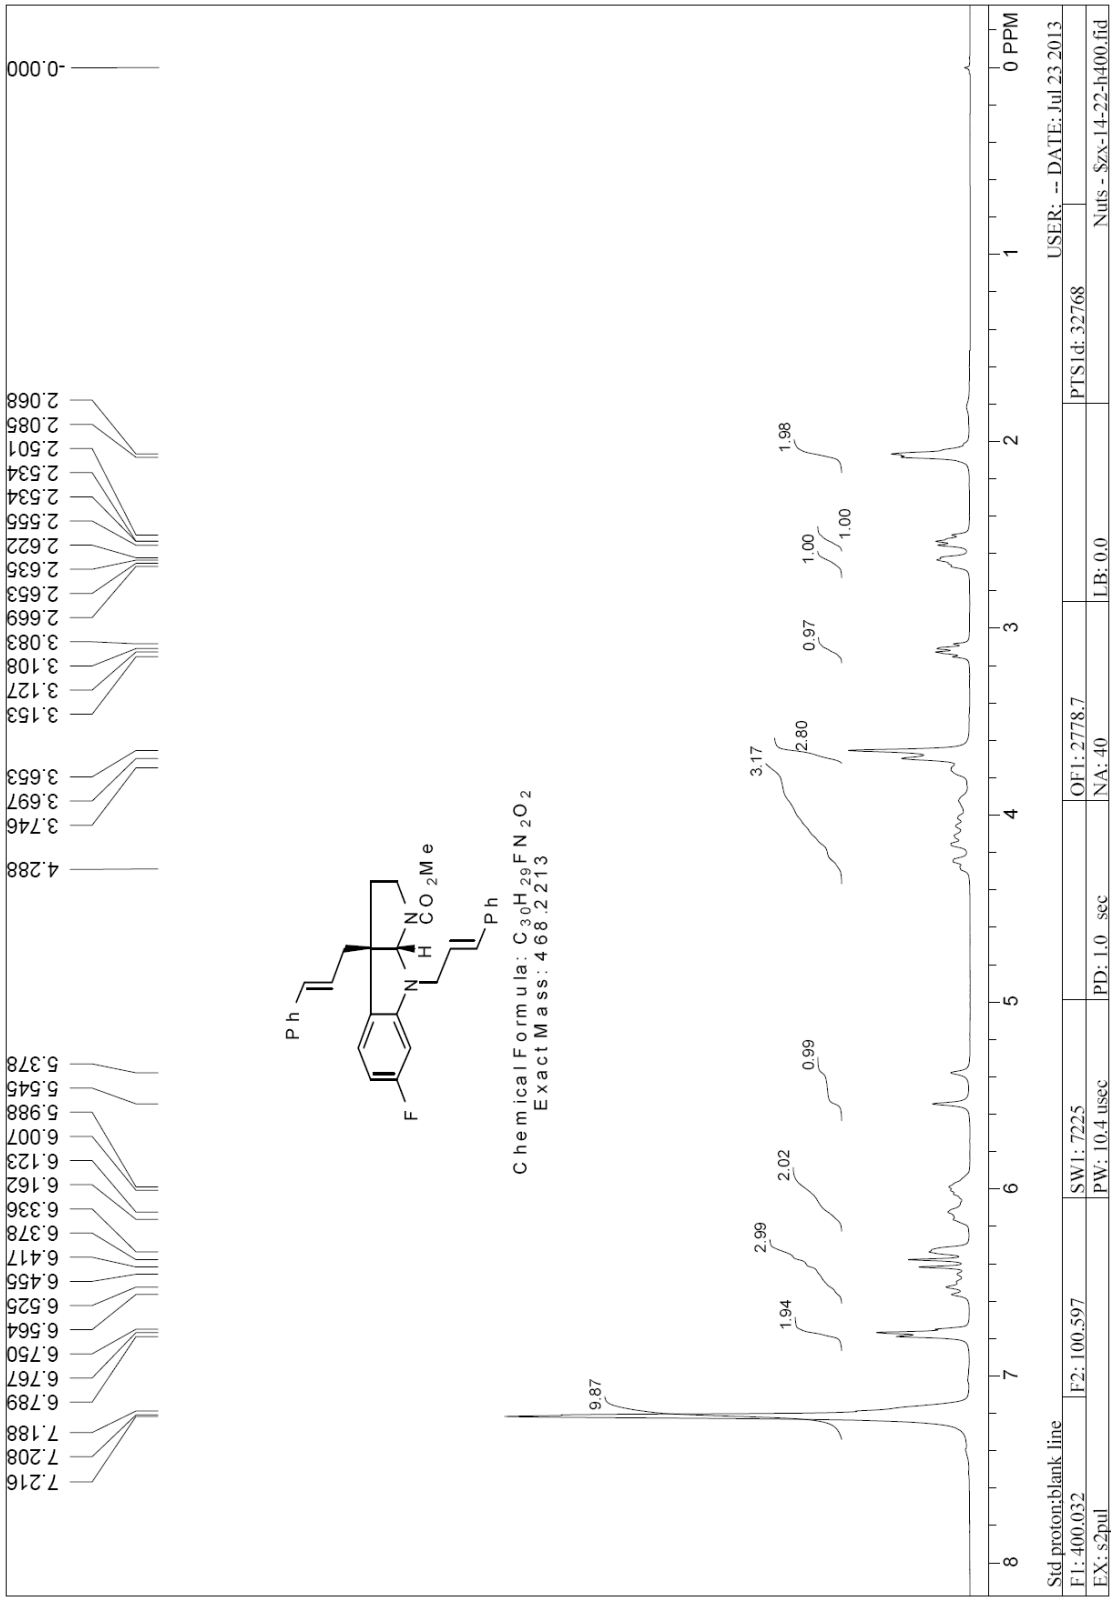

Compound **4ia**'s  $^{13}\text{C}$  NMR Spectra

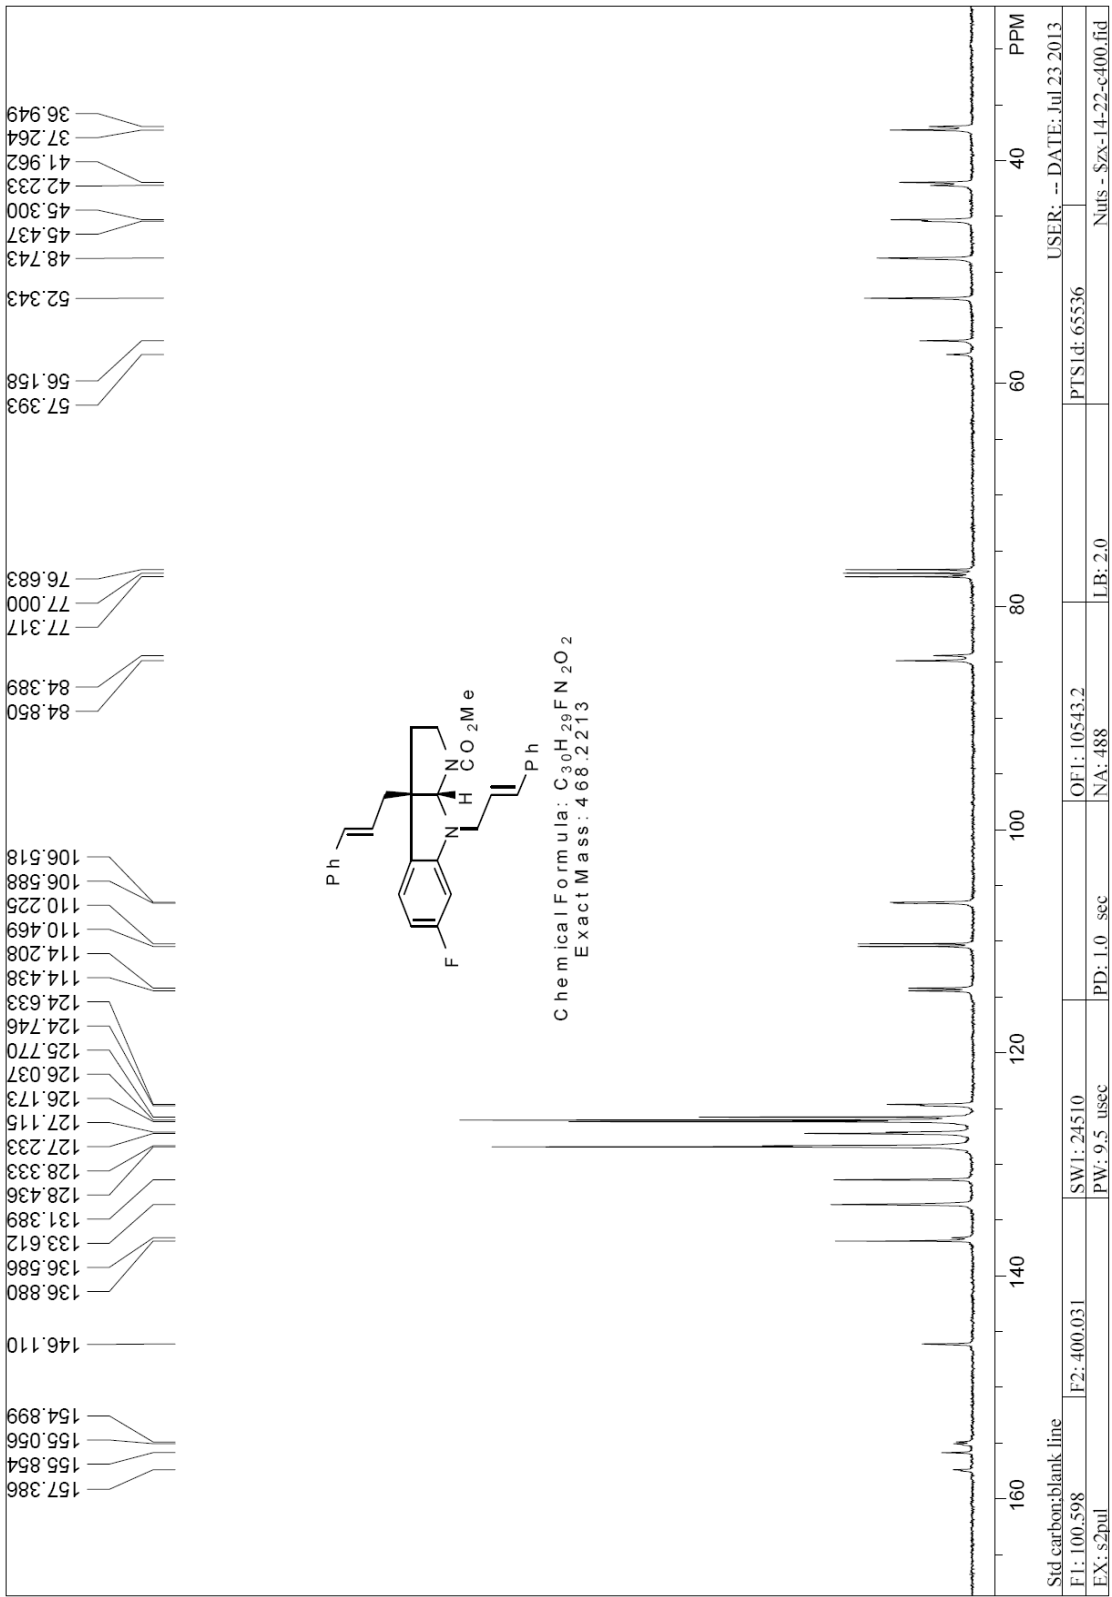

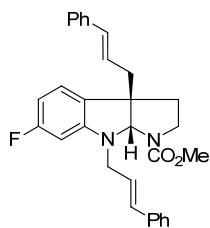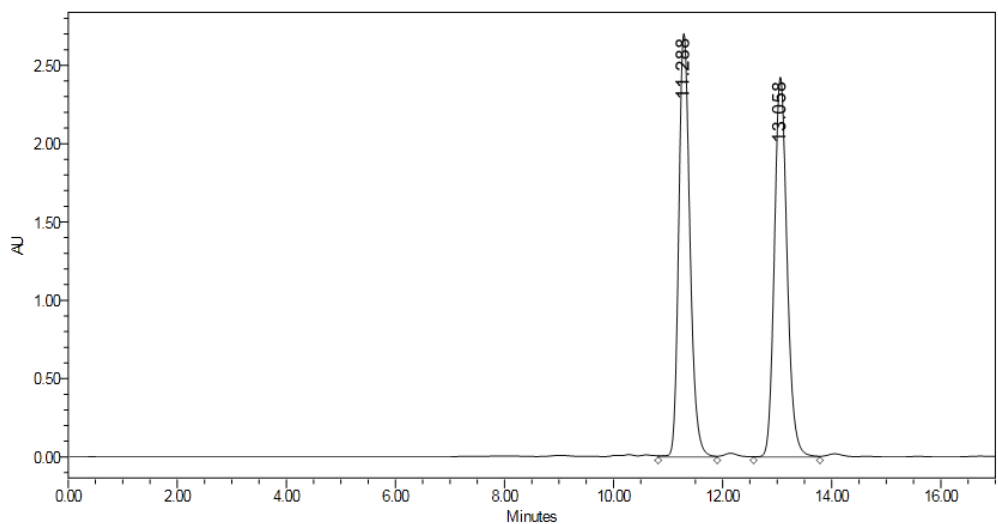

|   | RT<br>(min) | Area<br>( $\mu\text{V}\cdot\text{sec}$ ) | % Area |
|---|-------------|------------------------------------------|--------|
| 1 | 11.288      | 38665031                                 | 49.61  |
| 2 | 13.058      | 39268850                                 | 50.39  |

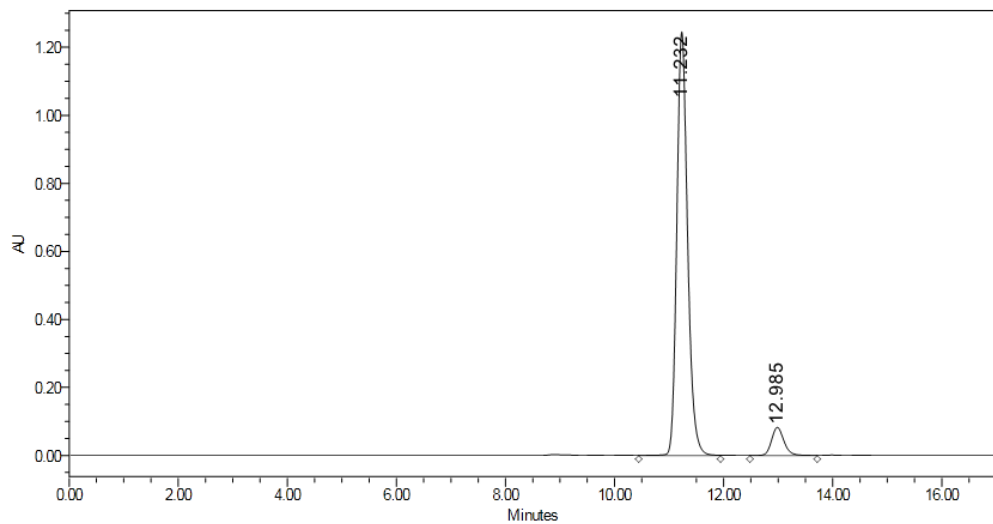

|   | RT<br>(min) | Area<br>( $\mu\text{V}\cdot\text{sec}$ ) | % Area |
|---|-------------|------------------------------------------|--------|
| 1 | 11.232      | 17075103                                 | 92.85  |
| 2 | 12.985      | 1314498                                  | 7.15   |

Compound **5ga**'s <sup>1</sup>H NMR Spectra

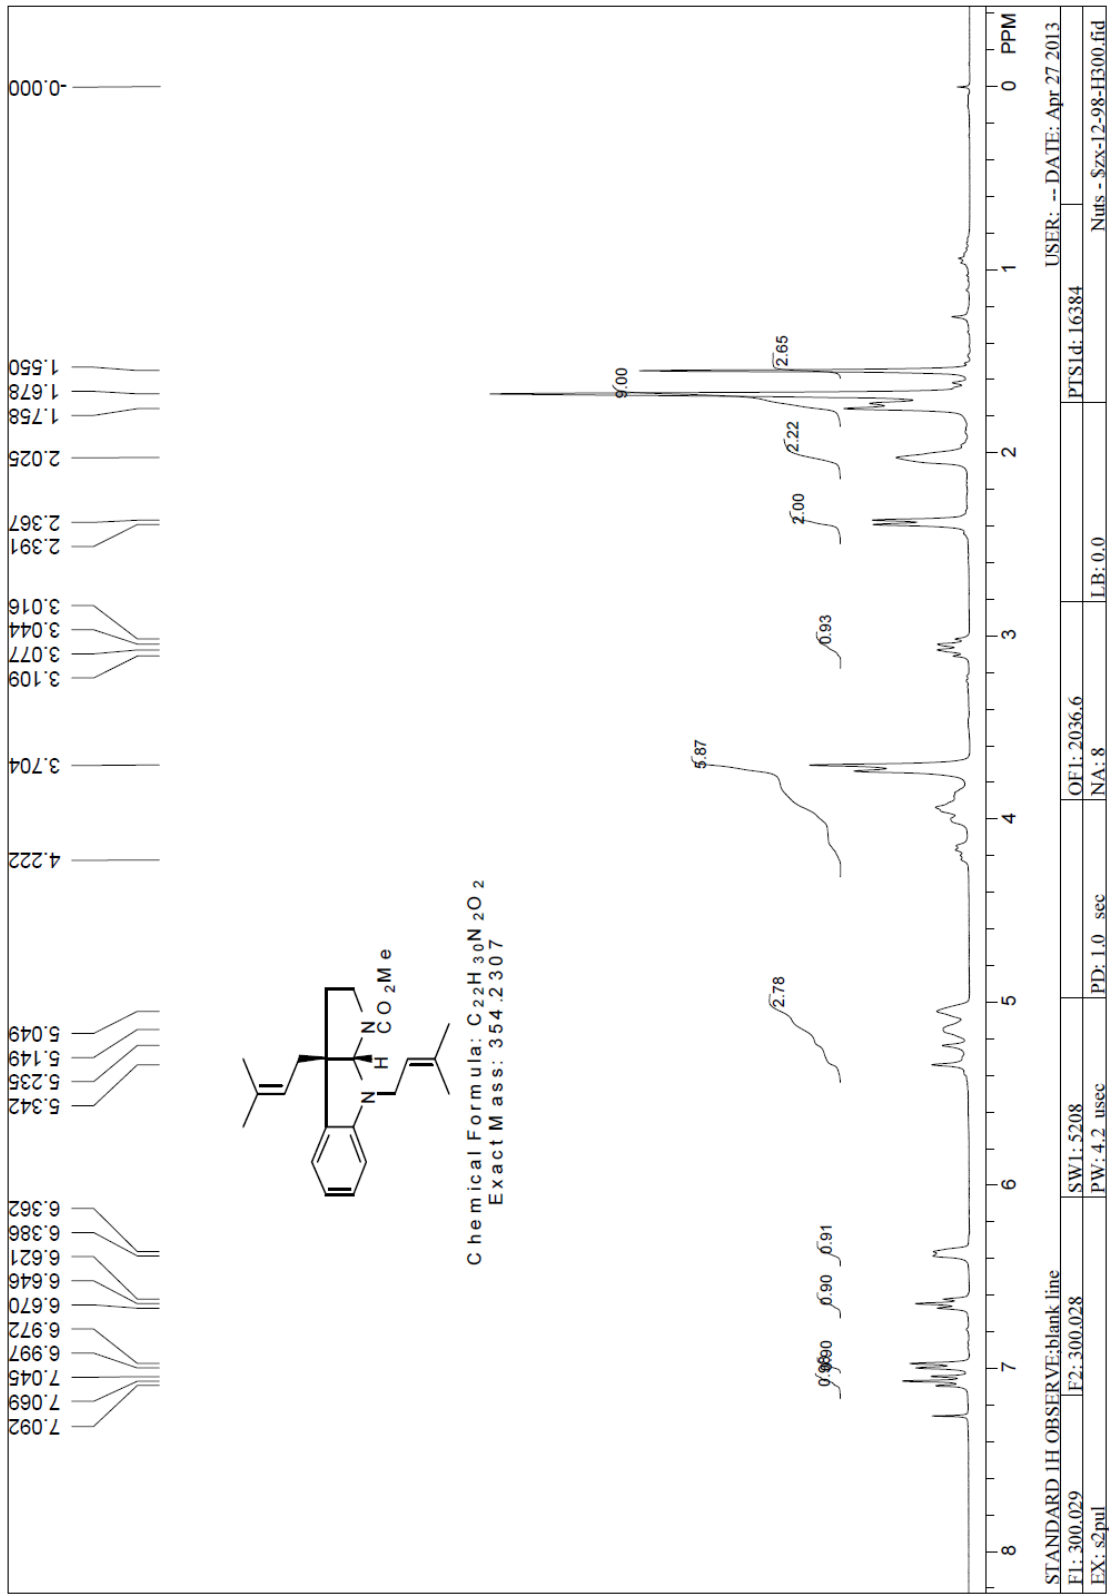



(-)-debromoflustramine B's <sup>1</sup>H NMR Spectra

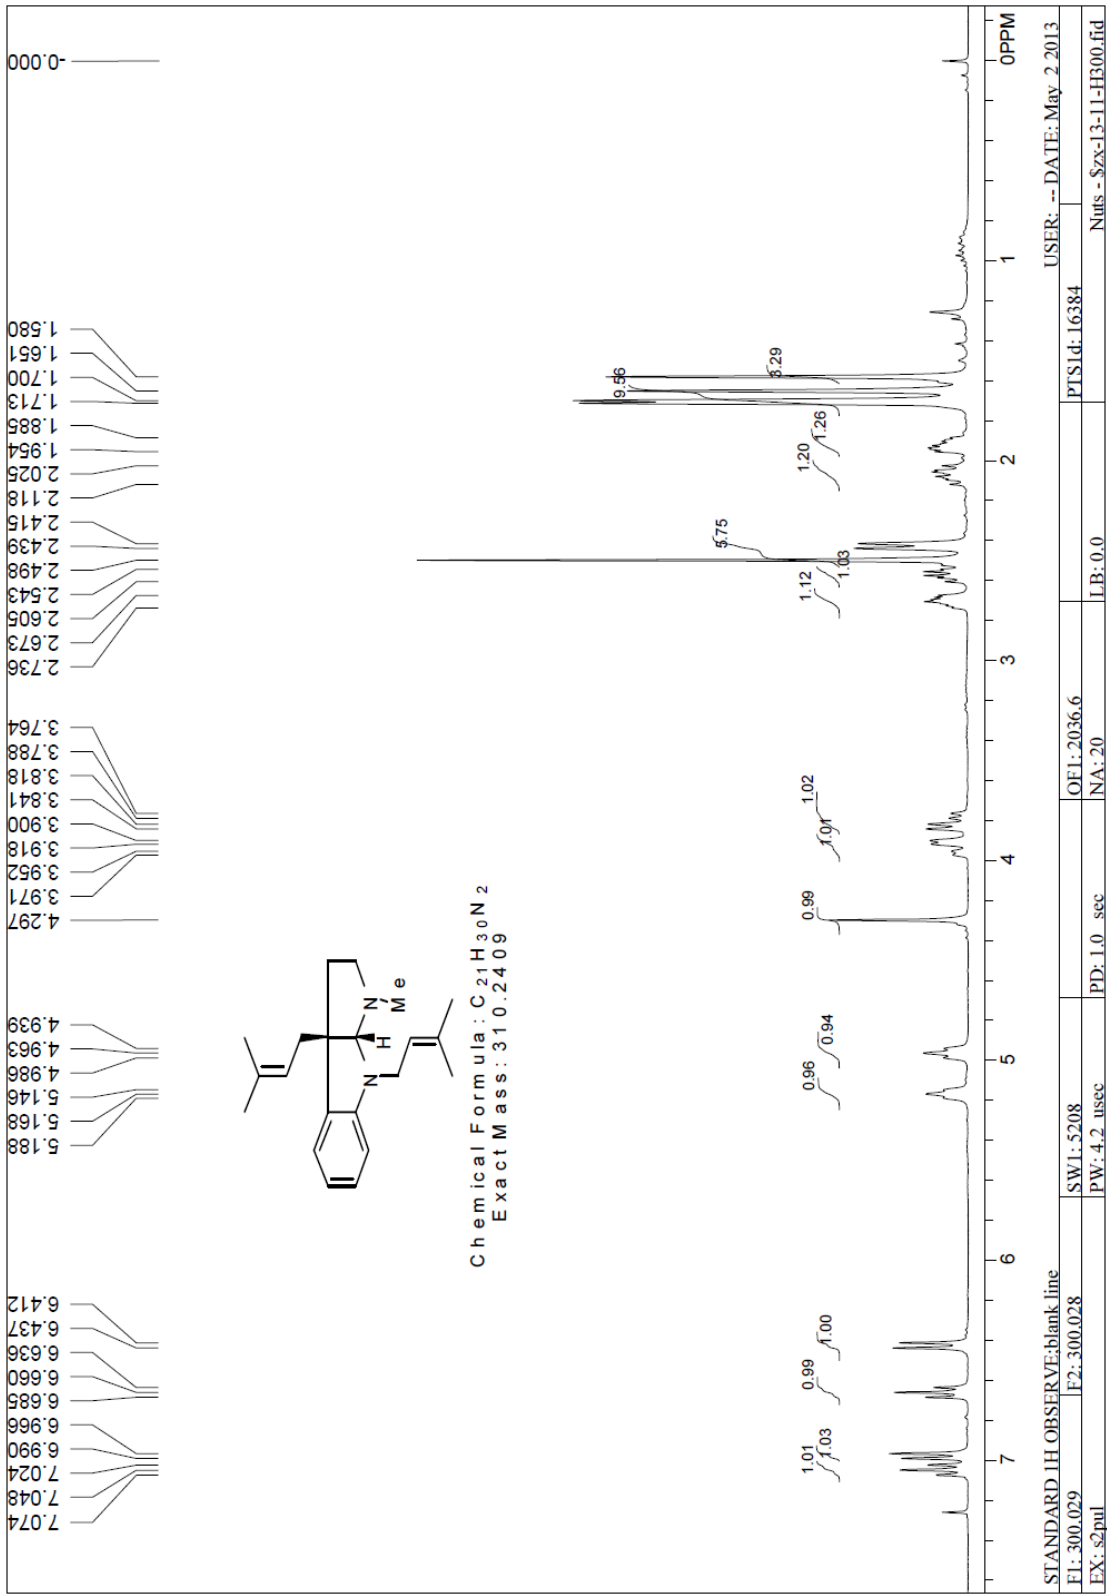

Supplement: c3sc53019a.pdf [file c3sc53019a.pdf]
